# Supplementary material for: LegacyVegetation 1.0: Global reconstruction of vegetation composition and forest cover from pollen archives of the last 50 ka
Source: Copernicus journal article supplement (doi:10.5194/essd-2023-486), 2024-04-02
Supplement: Supplementary file 1 [file essd-2023-486-supplement.pdf]

# Supplementary Material

List of arboreal taxa used for the forest cover reconstruction. Betulaceae was set as arboreal south of 70°N.

|               |                  |                  |
|---------------|------------------|------------------|
| Abies         | Brosimum         | Corylus          |
| Acacia        | Broussonetia     | Cryptomeria      |
| Acer          | Bursera          | Cunninghamia     |
| Aceraceae     | Byrsonima        | Cupania          |
| Aesculus      | Caesalpinia      | Cyclobalanopsis  |
| Aglaia        | Callicarpa       | Cyclocarya       |
| Ailanthus     | Camellia         | Dacrydium        |
| Albizia       | Canotia          | Dendropanax      |
| Aleurites     | Capparaceae      | Didymopanax      |
| Alfaroa       | Carya            | Dipterocarpaceae |
| Alnus         | Caryocar         | Distylium        |
| Altingia      | Caryodendron     | Ebenaceae        |
| Amyris        | Cassia           | Elaeocarpus      |
| Anacardiaceae | Castanea         | Engelhardia      |
| Anacardium    | Castanopsis      | Erythrina        |
| Annona        | Casuarina        | Eucalyptus       |
| Annonaceae    | Catalpa          | Eucommiaceae     |
| Antidesma     | Cathaya          | Eurya            |
| Aphanamixis   | Cecropia         | Excoecaria       |
| Apodytes      | Cedrus           | Exostema         |
| Aporosa       | Celtis           | Fagaceae         |
| Arbutus       | Ceratonia        | Fagus            |
| Arecaceae     | Cercidiphyllum   | Fraxinus         |
| Arenga        | Chamaecyparis    | Genipa           |
| Astronium     | Chamaerops       | Ginkgo           |
| Betula        | Cheirodendron    | Gleditsia        |
| Betulaceae    | Chrysobalanaceae | Glyptostrobus    |
| Bignoniaceae  | Chrysolepis      | Gordonia         |
| Bobea         | Citrus           | Guaiacum         |
| Bombax        | Clausena         | Guarea           |
| Bravaisia     | Clethra          | Guazuma          |

|               |                 |                |
|---------------|-----------------|----------------|
| Guettarda     | Melia           | Pourouma       |
| Gustavia      | Meliaceae       | Pouteria       |
| Gymnanthes    | Meliosma        | Pritchardia    |
| Haematoxylum  | Metasequoia     | Prosopis       |
| Hasseltia     | Metopium        | Protium        |
| Helicia       | Morinda         | Prunus         |
| Heliocarpus   | Morus           | Pseudolarix    |
| Heritiera     | Myrica          | Pseudotsuga    |
| Hevea         | Myricaceae      | Ptelea         |
| Hieronyma     | Nestegis        | Pterocarpus    |
| Hopea         | Nothofagus      | Pterocarya     |
| Hymenaea      | Nyssa           | Pteroceltis    |
| Idesia        | Nyssaceae       | Pygeum         |
| Inga          | Olea            | Pyrus          |
| Iriarteia     | Oleaceae        | Quercus        |
| Juglandaceae  | Ostrya.Carpinus | Randia         |
| Juglans       | Pandanaceae     | Rapanea        |
| Keteleeria    | Pandanus        | Ravenea        |
| Koelreuteria  | Parrotia        | Reevesia       |
| Lagerstroemia | Peltogyne       | Rhizophora     |
| Laguncularia  | Phellodendron   | Robinia        |
| Larix         | Phoenix         | Rutaceae       |
| Lauraceae     | Phyllostylon    | Sabal          |
| Leucaena      | Picea           | Sabiaceae      |
| Liquidambar   | Pinaceae        | Sapindaceae    |
| Liriodendron  | Pinus           | Sapindus       |
| Lithocarpus   | Planera         | Sapotaceae     |
| Maackia       | Platanaceae     | Sassafras      |
| Macaranga     | Platanus        | Schefflera     |
| Maclura       | Platycarya      | Schima         |
| Mallotus      | Platyclusus     | Sciadopitys    |
| Malus         | Podocarpaceae   | Sequoia        |
| Mangifera     | Polyscias       | Sequoiadendron |
| Manilkara     | Populus         | Sideroxylon    |
| Maytenus      | Posoqueria      | Simaroubaceae  |

|                |                  |                 |
|----------------|------------------|-----------------|
| Sloanea        | Alangiaceae      | Pithecellobium  |
| Sonneratia     | Baccaurea        | Roupala         |
| Sophora        | Camptotheca      | Thrinax         |
| Sorbus         | Carallia         | Abatia          |
| Spondias       | Casuarinaceae    | Adenantha       |
| Sterculia      | Choerospondias   | Aextoxicon      |
| Styrax         | Cinnamomum       | Alchorneopsis   |
| Swartzia       | Cleidiocarpon    | Aldina          |
| Swietenia      | Davidia          | Alibertia       |
| Symplocaceae   | Endospermum      | Ampelocera      |
| Symplocos      | Eriobotrya       | Anadenantha     |
| Syzygium       | Gironniera       | Andira          |
| Tapirira       | Gymnocladus      | Anemopaegma     |
| Taxaceae       | Gymnosporia      | Aniba           |
| Taxodium       | Hemiptelea       | Anthodiscus     |
| Taxus          | Lepisanthes      | Aparisthium     |
| Terminalia     | Lumnitzera       | Araucaria       |
| Tetracentron   | Mespilus         | Aspidosperma    |
| Theaceae       | Miliusa          | Astrocaryum     |
| Theobroma      | Pometia          | Attalea         |
| Thuja          | Rhamnoneuron     | Austrocedrus    |
| Thymelaeaceae  | Rhodoleia        | Azara           |
| Tilia          | Schoepfia        | Bactris         |
| Tovomita       | Tetramelaceae    | Balfourodendron |
| Trachycarpus   | Tiliaceae        | Billia          |
| Trichilia      | Toona            | Bocoa           |
| Triplaris      | Trochodendraceae | Bombacaceae     |
| Trochodendron  | Xanthoceras      | Bombacopsis     |
| Tsuga          | Argania          | Bonnetiaceae    |
| Ulmaceae       | Hagenia          | Bowdichia       |
| Ulmus          | Picconia         | Brunellia       |
| Viola          | Chrysophyllum    | Burseraceae     |
| Zelkova        | Hampea           | Cabralea        |
| Zygophyllaceae | Hura             | Calophyllaceae  |
| Aegiceras      | Pachira          | Calophyllum     |

|                  |                |                 |
|------------------|----------------|-----------------|
| Calycolpus       | Elaeagia       | Lepidocaryum    |
| Calycophyllum    | Elaeoluma      | Lithraea        |
| Camptosperma     | Embothrium     | Luehea          |
| Campomanesia     | Endopleura     | Mabea           |
| Campsiandra      | Eriotheca      | Macherium       |
| Carapa           | Erisma         | Macrolobium     |
| Cariniana        | Escalloniaceae | Magonia         |
| Caryocaraceae    | Eschweilera    | Manicaria       |
| Cassipourea      | Esenbeckia     | Maquira         |
| Castilla         | Euterpe        | Margaritaria    |
| Catostemma       | Fitzroya       | Mauritia        |
| Cavanillesia     | Froesiodendron | Mauritiella     |
| Cedrela          | Geoffroea      | Metrosideros    |
| Ceiba            | Gevuina        | Metteniusaceae  |
| Centrolobium     | Godoya         | Micropholis     |
| Ceroxylon        | Gomortega      | Mouriri         |
| Clusia           | Goupia         | Muntingia       |
| Cochlospermaceae | Havardia       | Myracrodruon    |
| Cochlospermum    | Helicostylis   | Myrceugenia     |
| Codia            | Herrania       | Myrcia          |
| Columelliaceae   | Hesperomeles   | Myristicaceae   |
| Connaraceae      | Hippomane      | Myrocarpus      |
| Copaifera        | Hirtella       | Myroxylon       |
| Copernicia       | Hydrogaster    | Nectandra       |
| Couepia          | Hymenobium     | Ochroma         |
| Couratari        | Iriartella     | Ocotea          |
| Crescentia       | Iryanthera     | Oenocarpus      |
| Crudia           | Jacaranda      | Ormosia         |
| Cryosophila      | Kielmeyera     | Panopsis        |
| Cybistax         | Lacmellea      | Parahancornia   |
| Dacryodes        | Laetia         | Parkia          |
| Dialium          | Lafoensia      | Pentaclethra    |
| Dictyocaryum     | Lamanonia      | Peraceae        |
| Dinizia          | Laurelia       | Phytelephas     |
| Drimys           | Lecythidaceae  | Picrodendraceae |

|                |                 |               |
|----------------|-----------------|---------------|
| Pilgerodendron | Vouacapoua      | Carpodetus    |
| Piliostigma    | Wettinia        | Cerberiopsis  |
| Polylepis      | Winteraceae     | Charpentiera  |
| Poraqueiba     | Xylopia         | Cocos         |
| Prumnopitys    | Zeyheria        | Corymbia      |
| Pseudobombax   | Zollernia       | Corynocarpus  |
| Pseudolmedia   | Agathis         | Cupaniopsis   |
| Pseudopanax    | Aidia           | Dacrycarpus   |
| Pterandra      | Alectryon       | Daphniphyllum |
| Pterogyne      | Allocauarina    | Darlingia     |
| Qualea         | Alphitonia      | Dillenia      |
| Quararibea     | Amoora          | Doryphora     |
| Richeria       | Angophora       | Dysoxylum     |
| Rinorea        | Aphananthe      | Elaeodendron  |
| Sacoglottis    | Araucariaceae   | Elattostachys |
| Saxegothaea    | Archidendron    | Emmenosperma  |
| Scheelea       | Archontophoenix | Flindersia    |
| Schinopsis     | Argyrodendron   | Ganophyllum   |
| Schizolobium   | Arytera         | Guioa         |
| Sclerolobium   | Ascarina        | Gymnostoma    |
| Senefeldera    | Atalaya         | Hodgkinsonia  |
| Simarouba      | Atherosperma    | Homalium      |
| Socratea       | Athrotaxis      | Irvingbaileya |
| Spirotheca     | Austrobuxus     | Ixerba        |
| Stemonuraceae  | Balanops        | Kleinhovia    |
| Stereospermum  | Beilschmiedia   | Knightia      |
| Syagrus        | Bischofia       | Lagarostrobos |
| Symmeria       | Brachychiton    | Libocedrus    |
| Symphonia      | Bridelia        | Manoao        |
| Tachigali      | Bruguiera       | Melicytus     |
| Talisia        | Buchanania      | Metroxylon    |
| Unonopsis      | Callitris       | Mida          |
| Vachellia      | Calocedrus      | Mimusops      |
| Vallea         | Camptostemon    | Musgravea     |
| Vochysiaceae   | Cardwellia      | Myristica     |

|                |                 |                  |
|----------------|-----------------|------------------|
| Octomeles      | Bersama         | Faurea           |
| Opiliaceae     | Bismarckia      | Ficalhoa         |
| Oraniopsis     | Blighia         | Fleroya          |
| Palaquium      | Borassus        | Foetidia         |
| Papuacedrus    | Boswellia       | Funtumia         |
| Parinari       | Brachystegia    | Gilbertiodendron |
| Phyllocladus   | Burkea          | Glenniea         |
| Planchonia     | Canarium        | Guibourtia       |
| Pleiogynium    | Catha           | Gyrocarpus       |
| Psydrax        | Catunaregam     | Haematostaphis   |
| Rhopalostylis  | Chytranthus     | Harungana        |
| Sphenostemon   | Cleistanthus    | Hildegardia      |
| Stenocarpus    | Cola            | Holoptelea       |
| Timonius       | Coula           | Hylodendron      |
| Xanthostemon   | Crateva         | Hymenocardia     |
| Xylocarpus     | Cryptosepalum   | Hymenodictyon    |
| Acanthophoenix | Cussonia        | Hymenostegia     |
| Achariaceae    | Cylicodiscus    | Hyophorbe        |
| Adansonia      | Cylicomorpha    | Hyphaene         |
| Afraegle       | Daniellia       | Irvingia         |
| Afzelia        | Delonix         | Isoberlinia      |
| Alstonia       | Detarium        | Julbernardia     |
| Amanoa         | Dictyosperma    | Khaya            |
| Androstachys   | Dombeya         | Kigelia          |
| Anopyxis       | Dracaena        | Kirkia           |
| Anthocleista   | Dyopsis         | Labourdonnaisia  |
| Anthostema     | Ekebergia       | Lannea           |
| Antiaris       | Elaeis          | Lasiodiscus      |
| Antrocaryon    | Entandrophragma | Leptaulus        |
| Aphania        | Eriocoelum      | Leucosidea       |
| Azadirachta    | Erythroocca     | Loesenera        |
| Baikiaea       | Erythrophleum   | Lophira          |
| Balanites      | Euclea          | Lovoa            |
| Barbeya        | Fagaropsis      | Maesopsis        |
| Berlinia       | Faidherbia      | Majidea          |

|                 |               |
|-----------------|---------------|
| Mansonia        | Sorindeia     |
| Maranthes       | Spathodea     |
| Markhamia       | Spirostachys  |
| Martretia       | Tamarindus    |
| Milicia         | Teclea        |
| Mitragyna       | Tieghemella   |
| Musanga         | Treculia      |
| Myrianthus      | Trilepisium   |
| Neoboutonia     | Triplochiton  |
| Neoshirakia     | Trymatococcus |
| Newtonia        | Uapaca        |
| Noronhia        | Vitellaria    |
| Occhthocosmus   | Xylia         |
| Oldfieldia      | Xymalos       |
| Olinia          |               |
| Ozoroa          |               |
| Panda           |               |
| Pappea          |               |
| Pausinystalia   |               |
| Peltophorum     |               |
| Pentadesma      |               |
| Pericopsis      |               |
| Piptadeniastrum |               |
| Piptostigma     |               |
| Psiloxylon      |               |
| Ptaeroxylon     |               |
| Pycnanthus      |               |
| Quassia         |               |
| Rothmannia      |               |
| Santiria        |               |
| Sarcosperma     |               |
| Schrebera       |               |
| Sclerocarya     |               |
| Scorodophloeus  |               |
| Shirakiopsis    |               |
