# Supplementary material for: LegacyVegetation 1.0: Global reconstruction of vegetation composition and forest cover from pollen archives of the last 50 ka
Source: Copernicus journal article supplement (doi:10.5194/essd-2023-486), 2024-04-02
Supplement: Supplementary file [file essd-2023-486-AC3-supplement.pdf]

# Reply to Williams et al.

Laura Schild and Ulrike Herzs Schuh

Dear John Williams and colleagues,

We thank you for your comments on our manuscript and appreciate your special attention towards open science and open data issues.

We apologize for the omission of a reference to Neotoma connected to the LegacyPollen dataset and will of course rectify this oversight. We add citations in the description of LegacyPollen2.0 and expand our acknowledgements. A table listing all included Neotoma records and their DOIs is appended as well. We especially thank you for the helpful inclusion of the *doi()* function in the neotoma2 R package and the example code on github.

Please see our revised passages below.

Best regards

Laura Schild and Ulrike Herzs Schuh

## Revised text at line 76:

The pollen data synthesis LegacyPollen2.0 (Li et al., 2024b) includes 3728 temporally resolved records (time-series) distributed globally. Data were collected from individual publications and the Neotoma Paleoecology Database which includes data from the European Pollen Database, the QUAVIDA data base for Australasia, the Latin American Pollen Database, the African Pollen Database and the North American Pollen database (Flantua et al., 2015; Fyfe et al., 2009; Giesecke et al., 2014; Lézine et al., 2021; Rowe et al., 2007; Whitmore et al., 2005; Williams et al., 2018). An overview of Neotoma records included in LegacyPollen 2.0 can be found in Table S2.

Flantua, S.G.A., Hooghiemstra, H., Grimm, E.C., Behling, H., Bush, M.B., González-Arango, C., Gosling, W.D., Ledru, M.-P., Lozano-García, S., Maldonado, A., Prieto, A.R., Rull, V., Van Boxel, J.H., 2015. Updated site compilation of the Latin American Pollen Database. *Rev. Palaeobot. Palynol.* 223, 104–115. <https://doi.org/10.1016/j.revpalbo.2015.09.008>

Fyfe, R.M., de Beaulieu, J.-L., Binney, H., Bradshaw, R.H.W., Brewer, S., Le Flao, A., Finsinger, W., Gaillard, M.-J., Giesecke, T., Gil-Romera, G., Grimm, E.C., Huntley, B., Kunes, P., Köhl, N., Leydet, M., Lotter, A.F., Tarasov, P.E., Tonkov, S., 2009. The European Pollen Database: past efforts and current activities. *Veg. Hist. Archaeobotany* 18, 417–424. <https://doi.org/10.1007/s00334-009-0215-9>

Giesecke, T., Davis, B., Brewer, S., Finsinger, W., Wolters, S., Blaauw, M., de Beaulieu, J.-L., Binney, H., Fyfe, R.M., Gaillard, M.-J., Gil-Romera, G., van der Knaap, W.O., Kuneš, P., Köhl,

N., van Leeuwen, J.F.N., Leydet, M., Lotter, A.F., Ortu, E., Semmler, M., Bradshaw, R.H.W., 2014. Towards mapping the late Quaternary vegetation change of Europe. *Veg. Hist. Archaeobotany* 23, 75–86. <https://doi.org/10.1007/s00334-012-0390-y>

Lézine, A.-M., Ivory, S.J., Gosling, W.D., Scott, L., 2021. The African Pollen Database (APD) and tracing environmental change: State of the Art, in: *Quaternary Vegetation Dynamics*. CRC Press.

Rowe, C., Fraser, R., Harrison, S., Dodson, J., 2007. The QUAVIDA synergy: quaternary fire, vegetation and climate change in Australasia. *Quat. Int.* 167–168, 355–355. <https://doi.org/10.1016/j.quaint.2007.04.001>

Whitmore, J., Gajewski, K., Sawada, M., Williams, J.W., Shuman, B., Bartlein, P.J., Minckley, T., Viau, A.E., Webb, T., Shafer, S., Anderson, P., Brubaker, L., 2005. Modern pollen data from North America and Greenland for multi-scale paleoenvironmental applications. *Quat. Sci. Rev.* 24, 1828–1848. <https://doi.org/10.1016/j.quascirev.2005.03.005>

Williams, J.W., Grimm, E.C., Blois, J.L., Charles, D.F., Davis, E.B., Goring, S.J., Graham, R.W., Smith, A.J., Anderson, M., Arroyo-Cabrales, J., Ashworth, A.C., Betancourt, J.L., Bills, B.W., Booth, R.K., Buckland, P.I., Curry, B.B., Giesecke, T., Jackson, S.T., Latorre, C., Nichols, J., Purdum, T., Roth, R.E., Stryker, M., Takahara, H., 2018. The Neotoma Paleoecology Database, a multiproxy, international, community-curated data resource. *Quat. Res.* 89, 156–177. <https://doi.org/10.1017/qua.2017.105>

## Revised acknowledgements:

We thank Thomas Böhmer for support with dataset curation and harmonization. The project was supported by the Bundesministerium für Bildung, Wissenschaft, Forschung und Technologie through the German Climate Modeling Initiative PALMOD (grant no. 01LP1510C to UH), the European Union (ERC, GlacialLegacy grant no. 772852 to UH), and the China Scholarship Council (grant no. 201908130165 to CL). Data were partly obtained from the Neotoma Paleoecology Database (<http://www.neotomadb.org>) and its constituent databases (European Pollen Database, QUAVIDA data base for Australasia, Latin American Pollen Database, African Pollen Database and the North American Pollen database). The work of data contributors, data stewards, and the Neotoma community is gratefully acknowledged.

Table S2: List of all Neotoma records included in LegacyPollen 2.0.

| Dataset_ID | doi                |
|------------|--------------------|
| 4363       | 10.21233/00jj-rn55 |
| 22711      | 10.21233/00kz-c576 |
| 20060      | 10.21233/012s-c321 |
| 3923       | 10.21233/01cq-0v25 |
| 19784      | 10.21233/01fk-3b13 |
| 4551       | 10.21233/0471-wz80 |
| 4427       | 10.21233/04mx-dx20 |
| 19814      | 10.21233/04w0-7r18 |
| 3931       | 10.21233/054g-vs09 |
| 20012      | 10.21233/057s-wr75 |
| 26572      | 10.21233/05v5-d378 |
| 45223      | 10.21233/064r-zv51 |
| 48624      | 10.21233/0672-4W61 |
| 47864      | 10.21233/06YB-XK91 |
| 41514      | 10.21233/07ah-4r18 |
| 24330      | 10.21233/0875-yw50 |
| 4062       | 10.21233/08cj-ht50 |
| 46603      | 10.21233/0A8S-FT20 |
| 26518      | 10.21233/0ajk-6m86 |
| 24867      | 10.21233/0ax2-vj66 |
| 4053       | 10.21233/0bx3-kt48 |
| 16264      | 10.21233/0c9y-af32 |
| 45642      | 10.21233/0d1q-p773 |
| 25481      | 10.21233/0dqt-e594 |
| 17947      | 10.21233/0dt6-3493 |
| 40963      | 10.21233/0e66-gt09 |
| 40579      | 10.21233/0ebh-jc93 |
| 41602      | 10.21233/0ew2-sj35 |
| 24386      | 10.21233/0f9n-x142 |
| 24635      | 10.21233/0gh3-dt80 |
| 15211      | 10.21233/0hkg-af34 |
| 24376      | 10.21233/0jfa-j049 |
| 17354      | 10.21233/0jx5-7t71 |
| 20029      | 10.21233/0kgn-j437 |
| 15132      | 10.21233/0kpg-kx30 |
| 22672      | 10.21233/0kqz-j553 |
| 22820      | 10.21233/0kw2-2170 |
| 40572      | 10.21233/0m9v-mq69 |
| 4378       | 10.21233/0mn2-9w85 |
| 14177      | 10.21233/0mss-km04 |
| 15967      | 10.21233/0n3x-5g88 |
| 22817      | 10.21233/0nty-tb40 |
| 16222      | 10.21233/0pre-hx18 |
| 41205      | 10.21233/0rb3-az79 |
| 15207      | 10.21233/0rm4-f986 |
| 46447      | 10.21233/0vhe-5b77 |
| 41448      | 10.21233/0vty-vb30 |
| 21812      | 10.21233/0w0p-my34 |
| 42417      | 10.21233/0wn3-0048 |
| 15732      | 10.21233/0wvv-hb57 |
| 3969       | 10.21233/0xa7-w271 |
| 25427      | 10.21233/0xht-hx92 |
| 24673      | 10.21233/0xky-3a80 |
| 19846      | 10.21233/0xmq-rz62 |
| 22049      | 10.21233/0yan-yj67 |
| 15309      | 10.21233/0ywb-hk24 |
| 16193      | 10.21233/0yz5-ad05 |
| 19937      | 10.21233/0zcx-jb34 |
| 45347      | 10.21233/0zgh-6r09 |
| 24207      | 10.21233/0zqa-9w57 |
| 46512      | 10.21233/102F-CT44 |
| 15586      | 10.21233/108x-ge80 |
| 25843      | 10.21233/10kw-5k34 |
| 19995      | 10.21233/11hj-eq70 |
| 41606      | 10.21233/11ph-mc56 |
| 24164      | 10.21233/13fe-7b21 |
| 3985       | 10.21233/140w-er94 |
| 10981      | 10.21233/149e-e689 |
| 25786      | 10.21233/14rr-c071 |
| 21577      | 10.21233/1627-0v53 |
| 41027      | 10.21233/16gz-mt48 |
| 25408      | 10.21233/17jd-z330 |
| 19323      | 10.21233/17ta-5252 |
| 24542      | 10.21233/19wm-rd42 |
| 42539      | 10.21233/1BDV-YC11 |
| 47669      | 10.21233/1DT1-N648 |
| 45103      | 10.21233/1bnj-jq13 |
| 15420      | 10.21233/1ca9-2k79 |
| 24159      | 10.21233/1cnb-m133 |
| 4183       | 10.21233/1csh-9q73 |

|       |                    |
|-------|--------------------|
| 4393  | 10.21233/1csm-st79 |
| 22822 | 10.21233/1ef3-zj56 |
| 4436  | 10.21233/1f47-fs20 |
| 24086 | 10.21233/1fdm-x235 |
| 4239  | 10.21233/1g98-ct07 |
| 17617 | 10.21233/1gkg-2a65 |
| 45322 | 10.21233/1gmy-d414 |
| 18127 | 10.21233/1jd5-2935 |
| 14612 | 10.21233/1ks0-te29 |
| 24084 | 10.21233/1m09-f532 |
| 22683 | 10.21233/1mc2-sy03 |
| 21675 | 10.21233/1pwg-tx22 |
| 20020 | 10.21233/1r8k-p831 |
| 21533 | 10.21233/1sgv-kf95 |
| 15359 | 10.21233/1t37-sc11 |
| 41127 | 10.21233/1tmp-8264 |
| 25273 | 10.21233/1v4w-a061 |
| 24044 | 10.21233/1v7j-4770 |
| 26448 | 10.21233/1vvt-v868 |
| 4387  | 10.21233/1vxd-hm05 |
| 24412 | 10.21233/1vz8-h207 |
| 14264 | 10.21233/1x1e-yt36 |
| 4542  | 10.21233/1xas-kk11 |
| 24076 | 10.21233/20j0-gk71 |
| 4413  | 10.21233/20v9-7e75 |
| 4369  | 10.21233/20xs-m168 |
| 41619 | 10.21233/216r-7y34 |
| 41657 | 10.21233/22yh-z232 |
| 42542 | 10.21233/234z-6f61 |
| 4472  | 10.21233/26e5-b250 |
| 46290 | 10.21233/26yg-qw36 |
| 24595 | 10.21233/271c-xj09 |
| 22732 | 10.21233/272d-vg02 |
| 14639 | 10.21233/27j0-4960 |
| 24195 | 10.21233/28fw-fa08 |
| 4275  | 10.21233/28gf-4635 |
| 45188 | 10.21233/28zd-fk74 |
| 42421 | 10.21233/298g-zr75 |
| 15344 | 10.21233/29yf-f996 |
| 47618 | 10.21233/2DQ3-6153 |
| 16209 | 10.21233/2ac6-fd67 |
| 4348  | 10.21233/2ahm-tx69 |
| 3977  | 10.21233/2arg-mj55 |

|       |                    |
|-------|--------------------|
| 22805 | 10.21233/2b23-jr62 |
| 4127  | 10.21233/2bma-0p82 |
| 4011  | 10.21233/2c89-ct63 |
| 26512 | 10.21233/2cxq-pb51 |
| 40566 | 10.21233/2dyz-ac37 |
| 17717 | 10.21233/2ecb-3b52 |
| 45186 | 10.21233/2fkg-zq79 |
| 4256  | 10.21233/2gfj-a151 |
| 24555 | 10.21233/2hdq-sr31 |
| 24950 | 10.21233/2jhm-6w05 |
| 42568 | 10.21233/2kj1-jp45 |
| 22669 | 10.21233/2ks0-7d19 |
| 24863 | 10.21233/2kym-q693 |
| 17995 | 10.21233/2m53-f907 |
| 17342 | 10.21233/2p2t-qn32 |
| 41380 | 10.21233/2p95-3654 |
| 14549 | 10.21233/2q3p-8t07 |
| 17832 | 10.21233/2q7v-1454 |
| 25514 | 10.21233/2rha-px75 |
| 24665 | 10.21233/2rhp-py68 |
| 15487 | 10.21233/2s88-n175 |
| 22894 | 10.21233/2sa7-q544 |
| 45385 | 10.21233/2tkh-z079 |
| 4385  | 10.21233/2v5v-v203 |
| 19913 | 10.21233/2vzb-bg61 |
| 42645 | 10.21233/2wvj-4383 |
| 41197 | 10.21233/2wxy-fm50 |
| 19264 | 10.21233/2x38-6j55 |
| 4188  | 10.21233/2xk9-gy52 |
| 14797 | 10.21233/2xrb-wn37 |
| 3988  | 10.21233/2yt1-f536 |
| 24516 | 10.21233/2yv5-0c85 |
| 24513 | 10.21233/2yzn-v779 |
| 24633 | 10.21233/30sd-fp85 |
| 25765 | 10.21233/30sw-xp94 |
| 14794 | 10.21233/314t-a768 |
| 15724 | 10.21233/31ah-kk77 |
| 46451 | 10.21233/32mp-be87 |
| 40317 | 10.21233/32se-yq93 |
| 22316 | 10.21233/33pr-sh52 |
| 24532 | 10.21233/349p-7t96 |
| 3875  | 10.21233/34k1-e825 |
| 21830 | 10.21233/34yd-xm12 |

|       |                    |
|-------|--------------------|
| 21726 | 10.21233/3651-zp81 |
| 20163 | 10.21233/36tb-yy55 |
| 22656 | 10.21233/378b-6586 |
| 45731 | 10.21233/37a7-9h33 |
| 16105 | 10.21233/38ev-4529 |
| 40454 | 10.21233/39k5-ew03 |
| 47595 | 10.21233/3B46-2P68 |
| 46726 | 10.21233/3M1B-H276 |
| 46693 | 10.21233/3NKX-DK96 |
| 22681 | 10.21233/3aeh-hs14 |
| 4415  | 10.21233/3emp-8f59 |
| 40945 | 10.21233/3epn-hs17 |
| 41502 | 10.21233/3fmj-ne26 |
| 13079 | 10.21233/3g0t-1t98 |
| 24155 | 10.21233/3hey-1169 |
| 41589 | 10.21233/3hnm-z839 |
| 24286 | 10.21233/3j3b-qm75 |
| 4501  | 10.21233/3jez-g489 |
| 20065 | 10.21233/3jm4-0r55 |
| 21543 | 10.21233/3jx5-m665 |
| 22358 | 10.21233/3kyv-3k70 |
| 46492 | 10.21233/3mhs-jm74 |
| 40490 | 10.21233/3n0e-0283 |
| 24488 | 10.21233/3nc2-mk25 |
| 15292 | 10.21233/3p7k-v248 |
| 15383 | 10.21233/3pbp-d740 |
| 15201 | 10.21233/3pkd-8685 |
| 4168  | 10.21233/3ppz-sz86 |
| 21917 | 10.21233/3prs-zt23 |
| 45377 | 10.21233/3pzj-0y37 |
| 26319 | 10.21233/3qvt-5e15 |
| 17298 | 10.21233/3r9h-5q68 |
| 4293  | 10.21233/3s1a-0h86 |
| 4092  | 10.21233/3vvs-zb43 |
| 24373 | 10.21233/3y80-dr46 |
| 46464 | 10.21233/3yd7-jc96 |
| 46473 | 10.21233/3zmx-5r44 |
| 24524 | 10.21233/3zs9-w545 |
| 41247 | 10.21233/40c4-rg98 |
| 14948 | 10.21233/414e-k787 |
| 22747 | 10.21233/417v-rg61 |
| 15356 | 10.21233/41a2-9620 |
| 45196 | 10.21233/42f5-8f49 |

|       |                    |
|-------|--------------------|
| 24118 | 10.21233/42qq-a716 |
| 17375 | 10.21233/42z3-5s40 |
| 41018 | 10.21233/43vz-0d54 |
| 15831 | 10.21233/44v8-7p56 |
| 45381 | 10.21233/45g4-ry85 |
| 24530 | 10.21233/46s2-ed45 |
| 15003 | 10.21233/48nv-1h83 |
| 47011 | 10.21233/4974-QC65 |
| 24624 | 10.21233/49j0-se42 |
| 4142  | 10.21233/49qd-q283 |
| 47004 | 10.21233/4BAE-XF23 |
| 48649 | 10.21233/4MXX-C134 |
| 46682 | 10.21233/4QB2-3C42 |
| 14270 | 10.21233/4b1p-c888 |
| 4484  | 10.21233/4b53-ep44 |
| 21798 | 10.21233/4b8r-yv06 |
| 4163  | 10.21233/4c5r-s872 |
| 4373  | 10.21233/4cn4-wj75 |
| 4411  | 10.21233/4cn6-3t90 |
| 20156 | 10.21233/4drc-k617 |
| 3975  | 10.21233/4dxg-aq64 |
| 3994  | 10.21233/4dz1-ny70 |
| 24618 | 10.21233/4fc7-8829 |
| 14537 | 10.21233/4fsm-w415 |
| 25767 | 10.21233/4h6f-tx74 |
| 4389  | 10.21233/4j49-be77 |
| 46457 | 10.21233/4jv3-em45 |
| 25007 | 10.21233/4jwe-5f69 |
| 15035 | 10.21233/4k5g-jx08 |
| 45343 | 10.21233/4k7v-pp08 |
| 24495 | 10.21233/4kdn-gp37 |
| 22628 | 10.21233/4m0f-6v70 |
| 4167  | 10.21233/4mp7-wm75 |
| 42722 | 10.21233/4n0x-dj49 |
| 25466 | 10.21233/4prv-bd15 |
| 41224 | 10.21233/4pxw-bm05 |
| 4445  | 10.21233/4r4q-0m97 |
| 4492  | 10.21233/4r7r-4258 |
| 4301  | 10.21233/4rk9-4w51 |
| 42675 | 10.21233/4t3y-1v17 |
| 41222 | 10.21233/4tx7-3a59 |
| 15819 | 10.21233/4vq0-4494 |
| 24356 | 10.21233/4vzb-6v35 |

|       |                    |
|-------|--------------------|
| 21700 | 10.21233/4ydc-n204 |
| 4025  | 10.21233/4z1g-r833 |
| 3951  | 10.21233/4z7r-k050 |
| 22660 | 10.21233/4zaw-zb28 |
| 4045  | 10.21233/4zbw-2h35 |
| 41627 | 10.21233/4zww-1615 |
| 15408 | 10.21233/502z-2a36 |
| 21816 | 10.21233/5076-5v40 |
| 4524  | 10.21233/5179-fn49 |
| 15580 | 10.21233/51kp-1e53 |
| 4198  | 10.21233/52fh-aq29 |
| 15140 | 10.21233/52qv-3g19 |
| 15781 | 10.21233/52yq-b228 |
| 24499 | 10.21233/536b-mm31 |
| 24317 | 10.21233/538q-0k21 |
| 41278 | 10.21233/53ja-ce75 |
| 4403  | 10.21233/53ys-nt12 |
| 14938 | 10.21233/54cn-0794 |
| 15886 | 10.21233/56k5-ng15 |
| 4161  | 10.21233/56se-gy95 |
| 17363 | 10.21233/56yt-6d14 |
| 22730 | 10.21233/576f-8911 |
| 40486 | 10.21233/57g8-9549 |
| 22087 | 10.21233/58t7-6y73 |
| 20281 | 10.21233/596h-wc50 |
| 42563 | 10.21233/59ks-w850 |
| 14957 | 10.21233/59wz-qx78 |
| 48614 | 10.21233/5P77-ZQ05 |
| 47817 | 10.21233/5VZR-YH26 |
| 48363 | 10.21233/5XXJ-GH64 |
| 15191 | 10.21233/5aes-5y61 |
| 45181 | 10.21233/5ayt-5k20 |
| 15768 | 10.21233/5ct3-qj23 |
| 4352  | 10.21233/5d85-6d65 |
| 14911 | 10.21233/5drb-1282 |
| 12023 | 10.21233/5f1j-ch61 |
| 4386  | 10.21233/5gt0-z402 |
| 41098 | 10.21233/5h6b-ds48 |
| 22709 | 10.21233/5hsv-fx24 |
| 41216 | 10.21233/5j3e-pn82 |
| 40795 | 10.21233/5jx5-2077 |
| 24631 | 10.21233/5m52-nd84 |
| 15627 | 10.21233/5m7p-q097 |

|       |                    |
|-------|--------------------|
| 15013 | 10.21233/5mqf-9723 |
| 26563 | 10.21233/5mtf-w128 |
| 4396  | 10.21233/5pbb-z224 |
| 22883 | 10.21233/5qw0-fa47 |
| 45648 | 10.21233/5rcm-aa91 |
| 25163 | 10.21233/5rh4-5f23 |
| 20027 | 10.21233/5rms-aj77 |
| 25837 | 10.21233/5rsn-hm26 |
| 4489  | 10.21233/5ry3-kt92 |
| 14278 | 10.21233/5tbt-ws69 |
| 46459 | 10.21233/5vs6-sq73 |
| 3910  | 10.21233/5wm6-fj81 |
| 43525 | 10.21233/5wvt-cm23 |
| 24091 | 10.21233/5wwk-v219 |
| 46449 | 10.21233/5x6t-y404 |
| 3930  | 10.21233/5xct-6y32 |
| 16009 | 10.21233/5xje-xg37 |
| 15059 | 10.21233/5yf4-yx81 |
| 15919 | 10.21233/5zt0-g990 |
| 21549 | 10.21233/6032-6p09 |
| 24477 | 10.21233/60v1-q871 |
| 214   | 10.21233/612s-t274 |
| 4186  | 10.21233/6144-2g26 |
| 47580 | 10.21233/61K4-QF84 |
| 24053 | 10.21233/61k6-c182 |
| 16131 | 10.21233/620y-dx14 |
| 15494 | 10.21233/626e-7k44 |
| 15864 | 10.21233/62ad-2r14 |
| 26315 | 10.21233/62sj-zk58 |
| 21794 | 10.21233/6344-nb24 |
| 14951 | 10.21233/636g-9n86 |
| 13069 | 10.21233/638z-xp12 |
| 15306 | 10.21233/63x2-2k06 |
| 22749 | 10.21233/64xb-g250 |
| 14674 | 10.21233/65ar-gd68 |
| 4170  | 10.21233/65fw-bj58 |
| 4181  | 10.21233/66zq-3984 |
| 21551 | 10.21233/675d-as47 |
| 3932  | 10.21233/686e-3e44 |
| 41669 | 10.21233/69nc-5r65 |
| 46995 | 10.21233/6G4D-TF71 |
| 47506 | 10.21233/6M1T-DA61 |
| 4409  | 10.21233/6ag1-k287 |

|       |                    |
|-------|--------------------|
| 15740 | 10.21233/6am1-sj67 |
| 14680 | 10.21233/6ans-w752 |
| 24871 | 10.21233/6av9-jx79 |
| 4428  | 10.21233/6b8p-ke79 |
| 20515 | 10.21233/6beq-4462 |
| 19909 | 10.21233/6bhj-jv09 |
| 41214 | 10.21233/6ejf-rt19 |
| 15678 | 10.21233/6enp-3753 |
| 14963 | 10.21233/6es0-qa61 |
| 15876 | 10.21233/6fad-4339 |
| 16207 | 10.21233/6ftv-h112 |
| 20022 | 10.21233/6hft-x335 |
| 14682 | 10.21233/6hga-6436 |
| 15630 | 10.21233/6j0s-ag87 |
| 24312 | 10.21233/6j41-er97 |
| 15259 | 10.21233/6j8r-1g90 |
| 22835 | 10.21233/6kgm-zr91 |
| 46280 | 10.21233/6n58-k786 |
| 41273 | 10.21233/6n89-7w11 |
| 24469 | 10.21233/6p3k-yh02 |
| 41491 | 10.21233/6pe7-xh17 |
| 22986 | 10.21233/6ppf-y854 |
| 15734 | 10.21233/6pqr-ch60 |
| 17391 | 10.21233/6pz8-g423 |
| 15944 | 10.21233/6q36-sr27 |
| 3966  | 10.21233/6q48-7975 |
| 20001 | 10.21233/6qkv-y767 |
| 4084  | 10.21233/6skg-fz77 |
| 4213  | 10.21233/6ter-nj90 |
| 41909 | 10.21233/6tgg-3a45 |
| 15410 | 10.21233/6tzm-ms82 |
| 18108 | 10.21233/6vn0-1104 |
| 22678 | 10.21233/6w4z-z869 |
| 15783 | 10.21233/6xsz-gv46 |
| 24844 | 10.21233/6y4e-ym34 |
| 3990  | 10.21233/6ys9-2m10 |
| 4469  | 10.21233/6yzy-mc78 |
| 47571 | 10.21233/70S7-C853 |
| 4162  | 10.21233/7144-8c50 |
| 4362  | 10.21233/719p-q753 |
| 4319  | 10.21233/71yz-am65 |
| 20175 | 10.21233/72na-hf75 |
| 22723 | 10.21233/72t1-ep33 |

|       |                    |
|-------|--------------------|
| 13055 | 10.21233/7436-ph05 |
| 41426 | 10.21233/76ay-9f41 |
| 16109 | 10.21233/772k-7s80 |
| 21557 | 10.21233/77j4-vn11 |
| 22944 | 10.21233/77r6-x076 |
| 4527  | 10.21233/793y-2a05 |
| 46521 | 10.21233/7E9R-VP36 |
| 46516 | 10.21233/7F5C-W552 |
| 46514 | 10.21233/7M90-YN39 |
| 46698 | 10.21233/7VE7-FM07 |
| 47590 | 10.21233/7WF1-Z606 |
| 4164  | 10.21233/7aj5-ec03 |
| 32426 | 10.21233/7bhz-n612 |
| 15130 | 10.21233/7bsm-hd67 |
| 45092 | 10.21233/7btd-f613 |
| 4225  | 10.21233/7d1m-t529 |
| 41333 | 10.21233/7d1q-6n57 |
| 4382  | 10.21233/7d6z-6j10 |
| 40584 | 10.21233/7dfq-sj65 |
| 22876 | 10.21233/7dvy-1e52 |
| 13097 | 10.21233/7dx1-dt81 |
| 4375  | 10.21233/7emb-xm28 |
| 4296  | 10.21233/7gv9-gq90 |
| 17406 | 10.21233/7hfv-yz55 |
| 45184 | 10.21233/7hq9-gy29 |
| 15153 | 10.21233/7j16-cj20 |
| 24354 | 10.21233/7jm9-qy50 |
| 14995 | 10.21233/7jqj-6h03 |
| 16214 | 10.21233/7k06-yk60 |
| 45111 | 10.21233/7mpt-6z64 |
| 42716 | 10.21233/7mz3-tp55 |
| 46477 | 10.21233/7ntn-k111 |
| 16189 | 10.21233/7ptd-jy37 |
| 15872 | 10.21233/7q6k-xg57 |
| 41419 | 10.21233/7q7t-v963 |
| 4228  | 10.21233/7qh5-4032 |
| 25370 | 10.21233/7qkc-2q02 |
| 24050 | 10.21233/7qsa-xf22 |
| 4143  | 10.21233/7svf-3s04 |
| 3956  | 10.21233/7t0m-0g70 |
| 25230 | 10.21233/7t1e-5e40 |
| 4028  | 10.21233/7tf3-tt41 |
| 25320 | 10.21233/7v49-sj32 |

|       |                    |
|-------|--------------------|
| 18104 | 10.21233/7vwz-dk77 |
| 3889  | 10.21233/7xbe-9k30 |
| 15700 | 10.21233/7xwd-g592 |
| 41527 | 10.21233/7ys6-6178 |
| 41305 | 10.21233/808h-p562 |
| 43533 | 10.21233/81cx-my82 |
| 24528 | 10.21233/826g-j091 |
| 47520 | 10.21233/82XH-AC60 |
| 14535 | 10.21233/82xk-w954 |
| 42649 | 10.21233/82zt-4874 |
| 16241 | 10.21233/833d-sq44 |
| 26565 | 10.21233/833s-n396 |
| 4215  | 10.21233/8370-j585 |
| 22767 | 10.21233/84x5-sc43 |
| 3940  | 10.21233/85fe-n850 |
| 25349 | 10.21233/860r-wq86 |
| 16113 | 10.21233/86rn-w288 |
| 46490 | 10.21233/87r0-d068 |
| 25769 | 10.21233/87x4-w578 |
| 41646 | 10.21233/889v-rw31 |
| 24509 | 10.21233/88nk-cv26 |
| 22936 | 10.21233/88tp-8469 |
| 24996 | 10.21233/88vy-c298 |
| 47537 | 10.21233/89TB-QN51 |
| 41185 | 10.21233/89nd-vd67 |
| 357   | 10.21233/89x4-b040 |
| 46798 | 10.21233/8MN4-HF50 |
| 47866 | 10.21233/8P6K-2P36 |
| 47683 | 10.21233/8PFX-TC23 |
| 25414 | 10.21233/8b03-jg14 |
| 14678 | 10.21233/8bnm-7r08 |
| 45379 | 10.21233/8c8d-g988 |
| 15061 | 10.21233/8d1p-vk58 |
| 41138 | 10.21233/8d9a-qw75 |
| 24319 | 10.21233/8da7-b493 |
| 42566 | 10.21233/8dix-f954 |
| 17381 | 10.21233/8dpx-sk91 |
| 24850 | 10.21233/8ej4-q047 |
| 41345 | 10.21233/8f77-mr38 |
| 24414 | 10.21233/8gnn-8h69 |
| 15667 | 10.21233/8k2x-tx03 |
| 15702 | 10.21233/8k8v-tq87 |
| 17304 | 10.21233/8mna-yv25 |

|       |                    |
|-------|--------------------|
| 24966 | 10.21233/8mp7-5w52 |
| 14631 | 10.21233/8n1y-1h53 |
| 22367 | 10.21233/8pbq-v525 |
| 4441  | 10.21233/8ph7-sh90 |
| 4147  | 10.21233/8q3r-xv28 |
| 15413 | 10.21233/8q9d-e745 |
| 41181 | 10.21233/8rhg-kr24 |
| 20285 | 10.21233/8s7z-k891 |
| 45298 | 10.21233/8sy1-mp41 |
| 22971 | 10.21233/8t5w-8t95 |
| 15922 | 10.21233/8thg-6w60 |
| 4192  | 10.21233/8vjb-ww55 |
| 22773 | 10.21233/8w6z-7x05 |
| 4355  | 10.21233/8w98-fk51 |
| 24906 | 10.21233/8wkf-an28 |
| 41337 | 10.21233/8xqw-a996 |
| 15750 | 10.21233/8xyz-8886 |
| 3935  | 10.21233/8yhz-ht97 |
| 15709 | 10.21233/8zgx-7708 |
| 41102 | 10.21233/9012-tw18 |
| 4115  | 10.21233/9017-sb34 |
| 22908 | 10.21233/90xr-0g13 |
| 24840 | 10.21233/910a-sq22 |
| 25472 | 10.21233/91x9-5829 |
| 4311  | 10.21233/92cn-k485 |
| 41629 | 10.21233/935p-6302 |
| 20128 | 10.21233/93dm-rp40 |
| 4494  | 10.21233/93pf-0q48 |
| 22775 | 10.21233/93vm-fw90 |
| 45105 | 10.21233/94ex-9803 |
| 16107 | 10.21233/94pt-ya63 |
| 45113 | 10.21233/94x4-yd19 |
| 3501  | 10.21233/956t-ek11 |
| 20304 | 10.21233/959q-kw55 |
| 17873 | 10.21233/95n5-xt46 |
| 17689 | 10.21233/964d-n697 |
| 4397  | 10.21233/96th-h554 |
| 24959 | 10.21233/9703-dw51 |
| 41025 | 10.21233/98b3-ep64 |
| 19842 | 10.21233/98bb-am31 |
| 24229 | 10.21233/98da-sj31 |
| 40642 | 10.21233/98xz-ex68 |
| 4040  | 10.21233/98yq-bv63 |



|       |                    |
|-------|--------------------|
| 20171 | 10.21233/99e6-w772 |
| 22788 | 10.21233/99pm-v778 |
| 46680 | 10.21233/9FDV-XK62 |
| 46720 | 10.21233/9Q9F-B230 |
| 3946  | 10.21233/9a5v-f927 |
| 41191 | 10.21233/9b04-ms27 |
| 25188 | 10.21233/9dch-0a13 |
| 42161 | 10.21233/9de9-am39 |
| 24933 | 10.21233/9dw0-k479 |
| 45713 | 10.21233/9e9x-ff23 |
| 24327 | 10.21233/9efw-e650 |
| 22348 | 10.21233/9ekg-p878 |
| 25234 | 10.21233/9esw-7x29 |
| 14266 | 10.21233/9eyq-n046 |
| 4107  | 10.21233/9jtj-a557 |
| 4463  | 10.21233/9jtj-a557 |
| 4247  | 10.21233/9kr8-8s34 |
| 24339 | 10.21233/9mdv-br36 |
| 41489 | 10.21233/9n20-cc52 |
| 40793 | 10.21233/9na2-9193 |
| 3883  | 10.21233/9p75-y227 |
| 46292 | 10.21233/9pc1-0436 |
| 19997 | 10.21233/9pdf-7072 |
| 45331 | 10.21233/9qac-3n20 |
| 17336 | 10.21233/9qv2-xb92 |
| 24388 | 10.21233/9r0t-vm34 |
| 24539 | 10.21233/9sm0-1589 |
| 24441 | 10.21233/9sy2-nj92 |
| 15101 | 10.21233/9vfj-v497 |
| 46471 | 10.21233/9w17-3k66 |
| 15175 | 10.21233/9wfb-c822 |
| 24294 | 10.21233/9x8s-yg68 |
| 40448 | 10.21233/9y2h-5560 |
| 2393  | 10.21233/9yf5-e111 |
| 4462  | 10.21233/9yk4-5092 |
| 46523 | 10.21233/ACHA-AZ30 |
| 47259 | 10.21233/AEXN-ZW54 |
| 46709 | 10.21233/ARN6-PX17 |
| 47587 | 10.21233/B785-Q362 |
| 46611 | 10.21233/BHM0-3F23 |
| 46702 | 10.21233/BP0P-DN34 |
| 48640 | 10.21233/BS0T-C558 |
| 46716 | 10.21233/BTKV-JS74 |

|       |                    |
|-------|--------------------|
| 46522 | 10.21233/C06D-B533 |
| 48656 | 10.21233/CA6B-D485 |
| 46730 | 10.21233/CBMY-KS16 |
| 47606 | 10.21233/D41E-T729 |
| 46648 | 10.21233/DC6G-0117 |
| 48549 | 10.21233/DTAC-5E13 |
| 46655 | 10.21233/E28H-2K97 |
| 46695 | 10.21233/E43F-HA60 |
| 46687 | 10.21233/EAP4-RF36 |
| 48072 | 10.21233/ET35-P931 |
| 47567 | 10.21233/EVQR-8065 |
| 48633 | 10.21233/F0X4-1H86 |
| 47527 | 10.21233/F7JJ-4741 |
| 46998 | 10.21233/F9QR-CV27 |
| 47673 | 10.21233/FD92-M524 |
| 48621 | 10.21233/FEPD-WS38 |
| 48653 | 10.21233/FHH7-2056 |
| 46544 | 10.21233/FJC1-HS98 |
| 47584 | 10.21233/FXA3-JW42 |
| 46645 | 10.21233/GZGE-Q874 |
| 47685 | 10.21233/H8EZ-FB40 |
| 47769 | 10.21233/HBSK-FB02 |
| 46691 | 10.21233/HGKE-GM81 |
| 46841 | 10.21233/HP7D-SQ69 |
| 46718 | 10.21233/JFQ2-0A48 |
| 46711 | 10.21233/JK1S-VG18 |
| 47666 | 10.21233/JVAY-CW81 |
| 47767 | 10.21233/K06E-RW51 |
| 48645 | 10.21233/KG60-S564 |
| 47557 | 10.21233/KHZZ-1827 |
| 47771 | 10.21233/KM96-3E06 |
| 46684 | 10.21233/KSFK-9704 |
| 46650 | 10.21233/KW2V-X806 |
| 48616 | 10.21233/M5WS-VZ46 |
| 46722 | 10.21233/ME1H-RK46 |
| 48666 | 10.21233/MQMR-FV34 |
| 46630 | 10.21233/MYT8-WA75 |
| 47597 | 10.21233/N0RB-YF14 |
| 47621 | 10.21233/N4NQ-VT31 |
| 47504 | 10.21233/N5KS-1603 |
| 47555 | 10.21233/NQHZ-XW16 |
| 47968 | 10.21233/PKYN-3N83 |
| 46806 | 10.21233/PTPQ-QD21 |

|       |                    |
|-------|--------------------|
| 47497 | 10.21233/RC16-FQ24 |
| 47610 | 10.21233/RP9D-AX89 |
| 47494 | 10.21233/S6W8-ZW12 |
| 47663 | 10.21233/SB5J-M528 |
| 47561 | 10.21233/SF72-GR73 |
| 47814 | 10.21233/SGEJ-6H83 |
| 47535 | 10.21233/SZ9R-Q288 |
| 46689 | 10.21233/T58B-SN37 |
| 47564 | 10.21233/TH2T-9121 |
| 48668 | 10.21233/TP5S-FZ74 |
| 48358 | 10.21233/TS9V-G976 |
| 47599 | 10.21233/TSWK-BC56 |
| 47027 | 10.21233/TVV5-YQ86 |
| 48658 | 10.21233/V1MX-0B83 |
| 47604 | 10.21233/V3G5-VF48 |
| 46535 | 10.21233/V7AX-RV90 |
| 46653 | 10.21233/VC03-9R77 |
| 46724 | 10.21233/VSJM-6E28 |
| 47602 | 10.21233/VW7G-2J12 |
| 48222 | 10.21233/VYYE-G931 |
| 47973 | 10.21233/WZFH-NC77 |
| 48611 | 10.21233/X95S-QX49 |
| 46672 | 10.21233/X9TF-0J97 |
| 47687 | 10.21233/XXP4-Z127 |
| 47110 | 10.21233/XZYB-6819 |
| 46659 | 10.21233/YE3D-FJ80 |
| 47671 | 10.21233/YJWS-JJ96 |
| 47502 | 10.21233/YP84-9451 |
| 47608 | 10.21233/YVFH-5B51 |
| 47681 | 10.21233/YWDS-WD04 |
| 46803 | 10.21233/Z852-D390 |
| 48361 | 10.21233/ZF2K-PA43 |
| 46704 | 10.21233/ZJ6P-GR59 |
| 46728 | 10.21233/ZNAR-CF17 |
| 4031  | 10.21233/a033-7j78 |
| 4326  | 10.21233/a049-xf64 |
| 3865  | 10.21233/a0q7-m868 |
| 16099 | 10.21233/a2e7-ky61 |
| 17285 | 10.21233/a40y-j676 |
| 23015 | 10.21233/a4j6-w793 |
| 21895 | 10.21233/a56z-1027 |
| 21919 | 10.21233/a5et-h994 |
| 20160 | 10.21233/a5ym-ww41 |

|       |                    |
|-------|--------------------|
| 15947 | 10.21233/a6gw-a462 |
| 2620  | 10.21233/a7g7-e649 |
| 14614 | 10.21233/a7se-2c50 |
| 22880 | 10.21233/a8eg-rs67 |
| 4245  | 10.21233/a9hx-nb84 |
| 41189 | 10.21233/a9sm-ma36 |
| 26437 | 10.21233/a9x3-nr55 |
| 21921 | 10.21233/aa9j-yp34 |
| 40321 | 10.21233/abcz-q362 |
| 24456 | 10.21233/actv-bj33 |
| 15286 | 10.21233/ad64-ks29 |
| 15929 | 10.21233/ad82-ja20 |
| 21836 | 10.21233/adjr-q523 |
| 24089 | 10.21233/adra-c679 |
| 4269  | 10.21233/ads2-bk31 |
| 24620 | 10.21233/aeqn-c862 |
| 15624 | 10.21233/aetg-rg52 |
| 45345 | 10.21233/aext-h866 |
| 15492 | 10.21233/ajqc-2p38 |
| 16212 | 10.21233/aktj-rk17 |
| 26514 | 10.21233/amj1-fm78 |
| 13047 | 10.21233/anc4-fp20 |
| 45391 | 10.21233/ap4h-y067 |
| 4257  | 10.21233/apjc-5g08 |
| 15007 | 10.21233/ar0p-hj05 |
| 14933 | 10.21233/arn2-5250 |
| 42652 | 10.21233/aryj-gv14 |
| 42559 | 10.21233/asm4-3r71 |
| 24186 | 10.21233/at68-km35 |
| 4360  | 10.21233/atkr-cs63 |
| 14923 | 10.21233/av5q-6587 |
| 16205 | 10.21233/awkk-cx49 |
| 4251  | 10.21233/axz3-2923 |
| 15591 | 10.21233/az3k-5181 |
| 14684 | 10.21233/azmm-9650 |
| 3938  | 10.21233/b0fw-9e91 |
| 4211  | 10.21233/b18z-e808 |
| 2899  | 10.21233/b2cd-db08 |
| 22862 | 10.21233/b2sa-vs04 |
| 4479  | 10.21233/b3av-3w75 |
| 24161 | 10.21233/b40a-qt66 |
| 4548  | 10.21233/b54b-nw94 |
| 45728 | 10.21233/b5h9-pm78 |

|       |                    |
|-------|--------------------|
| 46466 | 10.21233/b62t-vg05 |
| 15793 | 10.21233/b6rr-8867 |
| 24993 | 10.21233/b706-qn93 |
| 4320  | 10.21233/b71k-3606 |
| 41310 | 10.21233/b7c6-fn54 |
| 46483 | 10.21233/b7g3-vh04 |
| 21603 | 10.21233/b9ma-cv72 |
| 15866 | 10.21233/b9nq-n244 |
| 22687 | 10.21233/bax7-sx63 |
| 4082  | 10.21233/bc5s-nr94 |
| 16275 | 10.21233/bcqk-fe25 |
| 41762 | 10.21233/bdex-mm22 |
| 4241  | 10.21233/begd-z059 |
| 15641 | 10.21233/bepp-gp08 |
| 45704 | 10.21233/bfpc-jd87 |
| 4392  | 10.21233/bgsv-qs98 |
| 15106 | 10.21233/bhxy-pk21 |
| 25839 | 10.21233/bjeh-fe46 |
| 15752 | 10.21233/bjqy-em56 |
| 45639 | 10.21233/bkiz-st84 |
| 45329 | 10.21233/bkyg-et47 |
| 20194 | 10.21233/bm1c-7055 |
| 4443  | 10.21233/bp9d-qh60 |
| 45137 | 10.21233/bpfs-3r48 |
| 22969 | 10.21233/bppw-6791 |
| 21913 | 10.21233/bqfq-4x49 |
| 15392 | 10.21233/bqja-m092 |
| 24116 | 10.21233/brk6-dd51 |
| 3945  | 10.21233/brzb-ev42 |
| 21790 | 10.21233/bsv3-k317 |
| 22630 | 10.21233/bswe-2h73 |
| 20316 | 10.21233/bt6r-4598 |
| 15952 | 10.21233/bt73-3f31 |
| 16083 | 10.21233/bt8w-b647 |
| 16115 | 10.21233/bt94-dq60 |
| 30184 | 10.21233/btw4-bh35 |
| 25221 | 10.21233/bv3d-g466 |
| 41212 | 10.21233/bv7h-dw44 |
| 21537 | 10.21233/bvws-hb34 |
| 17322 | 10.21233/bx4k-0v94 |
| 24321 | 10.21233/bx5f-9y20 |
| 24518 | 10.21233/bxa2-pc38 |
| 3984  | 10.21233/bz4w-kv74 |

|       |                    |
|-------|--------------------|
| 42557 | 10.21233/bzbr-4h48 |
| 14134 | 10.21233/bzy2-pe09 |
| 4078  | 10.21233/c09q-sa29 |
| 46488 | 10.21233/c0s8-4k74 |
| 4418  | 10.21233/c1jz-a477 |
| 24645 | 10.21233/c2gf-2j68 |
| 15146 | 10.21233/c3aa-h411 |
| 41537 | 10.21233/c46j-ka17 |
| 16065 | 10.21233/c49c-z514 |
| 45190 | 10.21233/c52w-kn70 |
| 3876  | 10.21233/c5as-w284 |
| 4338  | 10.21233/c60e-p241 |
| 14889 | 10.21233/c69e-2m65 |
| 41308 | 10.21233/c6jy-0927 |
| 15696 | 10.21233/c6pe-5h03 |
| 17344 | 10.21233/c737-1334 |
| 20050 | 10.21233/c7eh-we69 |
| 4450  | 10.21233/c7fs-kf76 |
| 20034 | 10.21233/c8mz-0061 |
| 3900  | 10.21233/c9ps-vy90 |
| 40803 | 10.21233/ca85-bh57 |
| 3868  | 10.21233/caff-6e80 |
| 17371 | 10.21233/cbz6-xb88 |
| 21818 | 10.21233/cc4x-wz63 |
| 45393 | 10.21233/ccqb-dc70 |
| 21828 | 10.21233/cdq2-qq32 |
| 42687 | 10.21233/cecw-sb96 |
| 4283  | 10.21233/cg36-ty75 |
| 41755 | 10.21233/cg7r-v764 |
| 45202 | 10.21233/ch0p-9286 |
| 41614 | 10.21233/ch26-4s93 |
| 24481 | 10.21233/chjr-t175 |
| 20131 | 10.21233/cjmz-5m20 |
| 17352 | 10.21233/ckz2-ef80 |
| 41187 | 10.21233/cm96-6e64 |
| 20306 | 10.21233/cp60-cs35 |
| 1647  | 10.21233/cpgt-b026 |
| 41435 | 10.21233/cqkb-rx04 |
| 41382 | 10.21233/cqtf-2866 |
| 45698 | 10.21233/cr6x-be86 |
| 4308  | 10.21233/cr8f-k669 |
| 4437  | 10.21233/ct1z-ve54 |
| 15396 | 10.21233/ctpk-r067 |

|       |                    |
|-------|--------------------|
| 45655 | 10.21233/cvyt-k021 |
| 25018 | 10.21233/cwpc-7j59 |
| 4120  | 10.21233/cx8d-d024 |
| 16224 | 10.21233/cxev-3204 |
| 41351 | 10.21233/cxq0-9608 |
| 24363 | 10.21233/cxrf-mp20 |
| 16254 | 10.21233/cznd-fg62 |
| 16133 | 10.21233/d01t-8d61 |
| 15588 | 10.21233/d06n-bw32 |
| 41207 | 10.21233/d148-6h03 |
| 22926 | 10.21233/d2tj-p590 |
| 4482  | 10.21233/d47b-gd35 |
| 15187 | 10.21233/d4xx-zn44 |
| 24454 | 10.21233/d6jx-vy62 |
| 20279 | 10.21233/d73q-6954 |
| 45316 | 10.21233/d7f2-p170 |
| 20298 | 10.21233/d917-2x13 |
| 41329 | 10.21233/d9jn-js49 |
| 26433 | 10.21233/daff-1123 |
| 41631 | 10.21233/dayz-mr34 |
| 26608 | 10.21233/dbv5-q164 |
| 15298 | 10.21233/dcm2-wn02 |
| 41928 | 10.21233/dcqy-3516 |
| 41326 | 10.21233/ddey-hy33 |
| 18100 | 10.21233/dds5-cz13 |
| 24097 | 10.21233/dexk-db41 |
| 3991  | 10.21233/dfs- fr27 |
| 15764 | 10.21233/dfzy-sd04 |
| 42001 | 10.21233/dge8-0c88 |
| 4367  | 10.21233/dj3h-f670 |
| 40799 | 10.21233/djae-0e22 |
| 24190 | 10.21233/djqf-s823 |
| 45117 | 10.21233/dm65-7k56 |
| 21807 | 10.21233/dmvc-9j61 |
| 24507 | 10.21233/dngj-0r02 |
| 24046 | 10.21233/dnjr-rs32 |
| 21600 | 10.21233/dpfx-7555 |
| 14624 | 10.21233/dpjk-nw36 |
| 45107 | 10.21233/dptw-0b10 |
| 41298 | 10.21233/dq5k-vq16 |
| 4558  | 10.21233/dqcs-v558 |
| 22988 | 10.21233/dsrz-5k22 |
| 40452 | 10.21233/dtnh-n631 |

|       |                    |
|-------|--------------------|
| 25110 | 10.21233/dvxn-9g46 |
| 24059 | 10.21233/dwfv-m396 |
| 4431  | 10.21233/dwrs-9h77 |
| 4205  | 10.21233/dx45-we16 |
| 25285 | 10.21233/dz7x-af16 |
| 19834 | 10.21233/dzp4-pv02 |
| 45101 | 10.21233/dztb-ga02 |
| 24641 | 10.21233/dzzf-f817 |
| 14635 | 10.21233/e00p-4q45 |
| 15646 | 10.21233/e0q4-t414 |
| 4376  | 10.21233/e1h1-x270 |
| 19817 | 10.21233/e2ez-ep96 |
| 16199 | 10.21233/e2gb-7a78 |
| 21774 | 10.21233/e2hw-ah76 |
| 17402 | 10.21233/e34c-fp95 |
| 24600 | 10.21233/e387-w812 |
| 3995  | 10.21233/e3cd-bd97 |
| 45349 | 10.21233/e3mw-tc57 |
| 26429 | 10.21233/e4p1-1n07 |
| 14648 | 10.21233/e4z3-5t61 |
| 24547 | 10.21233/e523-zp67 |
| 24869 | 10.21233/e5sr-kd56 |
| 4417  | 10.21233/e5sw-b991 |
| 41653 | 10.21233/e7j2-b618 |
| 22803 | 10.21233/e7v0-v862 |
| 4199  | 10.21233/e8bv-7e06 |
| 14523 | 10.21233/e93w-j223 |
| 41760 | 10.21233/eakm-1a87 |
| 524   | 10.21233/ecm1-wf91 |
| 4402  | 10.21233/ecn2-ak50 |
| 20058 | 10.21233/ef79-v217 |
| 15189 | 10.21233/efy3-6z86 |
| 21665 | 10.21233/egh5-v320 |
| 24904 | 10.21233/ehcd-fw95 |
| 26499 | 10.21233/ehet-7b80 |
| 41525 | 10.21233/ehmm-vm11 |
| 16197 | 10.21233/ehwk-t858 |
| 4401  | 10.21233/ehyh-vn64 |
| 41177 | 10.21233/ejfb-t464 |
| 41864 | 10.21233/ek47-9m35 |
| 4287  | 10.21233/emr2-ry49 |
| 22650 | 10.21233/enk7-n978 |
| 15942 | 10.21233/enmq-kb54 |

|       |                    |
|-------|--------------------|
| 22923 | 10.21233/enr7-wa61 |
| 4148  | 10.21233/enzj-0b81 |
| 4442  | 10.21233/epfd-de13 |
| 45701 | 10.21233/epv2-3m87 |
| 40797 | 10.21233/eqhn-8105 |
| 21792 | 10.21233/eqv0-5067 |
| 25845 | 10.21233/ergd-e171 |
| 22826 | 10.21233/es4m-ew33 |
| 4388  | 10.21233/eye6-zs61 |
| 15778 | 10.21233/ez69-yw85 |
| 4258  | 10.21233/eze7-8418 |
| 22992 | 10.21233/f06a-v762 |
| 22910 | 10.21233/f0a8-d318 |
| 40951 | 10.21233/f1r6-n030 |
| 40443 | 10.21233/f2ee-nj62 |
| 4095  | 10.21233/f2r9-2c53 |
| 20289 | 10.21233/f3ba-6s09 |
| 4012  | 10.21233/f3pc-ac31 |
| 24865 | 10.21233/f3pg-3x04 |
| 15221 | 10.21233/f3va-hs11 |
| 25511 | 10.21233/f533-gn18 |
| 16103 | 10.21233/f5x5-y496 |
| 14946 | 10.21233/f630-mb35 |
| 22849 | 10.21233/f70k-ey12 |
| 45395 | 10.21233/f7qr-f244 |
| 25776 | 10.21233/f86j-0362 |
| 4151  | 10.21233/f903-f525 |
| 4364  | 10.21233/fb1t-1r29 |
| 41285 | 10.21233/fb4s-ds71 |
| 16278 | 10.21233/fb6e-1p18 |
| 15399 | 10.21233/fbm9-6394 |
| 4285  | 10.21233/fbsg-8t36 |
| 4063  | 10.21233/fbw1-p392 |
| 15738 | 10.21233/fcvg-km58 |
| 14560 | 10.21233/fd56-pw63 |
| 41766 | 10.21233/fds1-dt10 |
| 3879  | 10.21233/ff82-3p60 |
| 15136 | 10.21233/ffzs-p571 |
| 26431 | 10.21233/fga9-z080 |
| 22397 | 10.21233/fgen-7074 |
| 4423  | 10.21233/fhj7-pj76 |
| 15142 | 10.21233/fhxr-x596 |
| 41034 | 10.21233/fjnd-v956 |

|       |                    |
|-------|--------------------|
| 41764 | 10.21233/fka8-9069 |
| 24465 | 10.21233/fkht-hr86 |
| 24341 | 10.21233/fkrs-q995 |
| 15925 | 10.21233/fm9a-bm03 |
| 24861 | 10.21233/fnc3-w873 |
| 17400 | 10.21233/fnwr-vt02 |
| 45210 | 10.21233/frtz-w434 |
| 14622 | 10.21233/fs4c-mv83 |
| 4316  | 10.21233/fs8n-ec44 |
| 22644 | 10.21233/fs93-kd09 |
| 25340 | 10.21233/fssx-my06 |
| 16111 | 10.21233/fvhw-s571 |
| 16075 | 10.21233/fvkb-9e77 |
| 41497 | 10.21233/fw3s-ft98 |
| 24055 | 10.21233/fw4s-2605 |
| 22734 | 10.21233/fwh3-s335 |
| 4449  | 10.21233/fwvv-4v86 |
| 24937 | 10.21233/fx7m-a985 |
| 42679 | 10.21233/fy68-3t56 |
| 22101 | 10.21233/g0kj-nd32 |
| 16061 | 10.21233/g17d-2n36 |
| 4259  | 10.21233/g1np-hb58 |
| 42681 | 10.21233/g1wf-0z38 |
| 22667 | 10.21233/g20r-jy78 |
| 15394 | 10.21233/g3pw-gj52 |
| 13051 | 10.21233/g3qv-vs64 |
| 22828 | 10.21233/g4aa-8505 |
| 19901 | 10.21233/g546-j142 |
| 21580 | 10.21233/g56e-8205 |
| 40519 | 10.21233/g5jk-1e91 |
| 15288 | 10.21233/g6vy-4j29 |
| 3898  | 10.21233/g6z1-d641 |
| 20018 | 10.21233/g7c8-hk59 |
| 14525 | 10.21233/g7k0-8d93 |
| 41384 | 10.21233/g7x4-c998 |
| 40577 | 10.21233/g8pp-n508 |
| 40666 | 10.21233/g9hf-1t92 |
| 25435 | 10.21233/g9v8-1z05 |
| 4279  | 10.21233/gar4-ty16 |
| 15099 | 10.21233/gb30-9e28 |
| 15762 | 10.21233/gd2j-5k10 |
| 22623 | 10.21233/gdbt-zp90 |
| 21541 | 10.21233/gdtp-j631 |

|       |                    |
|-------|--------------------|
| 24216 | 10.21233/ge5b-h872 |
| 45351 | 10.21233/geb4-ch43 |
| 22706 | 10.21233/gfg1-ee16 |
| 4137  | 10.21233/gg82-s427 |
| 42683 | 10.21233/ggnn-mk26 |
| 25275 | 10.21233/gh60-9e82 |
| 22636 | 10.21233/gjbn-9951 |
| 25551 | 10.21233/gjvj-6s89 |
| 45695 | 10.21233/gmdn-sh18 |
| 46481 | 10.21233/gmfj-ka45 |
| 22658 | 10.21233/gmht-f823 |
| 22784 | 10.21233/gmhy-nn21 |
| 15955 | 10.21233/gmm9-y553 |
| 23004 | 10.21233/gmp0-vr07 |
| 26505 | 10.21233/gn10-hw94 |
| 25470 | 10.21233/gnb0-9516 |
| 3893  | 10.21233/gp8m-6z07 |
| 14884 | 10.21233/gpa8-an56 |
| 43513 | 10.21233/gpyr-c840 |
| 25368 | 10.21233/gq49-ep38 |
| 22874 | 10.21233/grf4-q917 |
| 46469 | 10.21233/grh1-ap74 |
| 24080 | 10.21233/gsax-vn12 |
| 21938 | 10.21233/gt52-mt02 |
| 24522 | 10.21233/gtyp-4x27 |
| 24298 | 10.21233/gve7-qt51 |
| 14276 | 10.21233/gvk8-r723 |
| 15032 | 10.21233/gw2b-x179 |
| 4410  | 10.21233/gw72-9x54 |
| 41456 | 10.21233/gwdm-cz78 |
| 40450 | 10.21233/gwh3-1a93 |
| 25763 | 10.21233/gwnk-ry08 |
| 4171  | 10.21233/gwts-9s82 |
| 16124 | 10.21233/gxbr-bj21 |
| 14521 | 10.21233/gxdp-2n47 |
| 15935 | 10.21233/gxny-ma10 |
| 4461  | 10.21233/gy1d-0c88 |
| 24570 | 10.21233/gy4b-s732 |
| 17368 | 10.21233/gyh8-pb41 |
| 4358  | 10.21233/gzqy-9x14 |
| 24221 | 10.21233/h1k4-fg42 |
| 20024 | 10.21233/h1s8-8h96 |
| 4531  | 10.21233/h1sz-c208 |

|       |                    |
|-------|--------------------|
| 4136  | 10.21233/h27c-dp97 |
| 22942 | 10.21233/h3bs-6188 |
| 24039 | 10.21233/h3rm-sh19 |
| 40992 | 10.21233/h3x5-xz62 |
| 24479 | 10.21233/h4cf-f980 |
| 40940 | 10.21233/h4gb-ka72 |
| 20295 | 10.21233/h5hf-4g09 |
| 4485  | 10.21233/h5wh-mm89 |
| 22890 | 10.21233/h657-1t24 |
| 41543 | 10.21233/h686-6m80 |
| 17713 | 10.21233/h72j-y982 |
| 4473  | 10.21233/h75a-p298 |
| 4424  | 10.21233/h7g7-g111 |
| 22797 | 10.21233/h8w0-4796 |
| 46131 | 10.21233/h94p-kc68 |
| 4317  | 10.21233/h9er-kf81 |
| 15327 | 10.21233/h9hp-vp69 |
| 22795 | 10.21233/h9zx-zt71 |
| 15331 | 10.21233/haqy-4x05 |
| 22807 | 10.21233/hbv9-4k46 |
| 4184  | 10.21233/hbws-c483 |
| 14274 | 10.21233/hca1-3g26 |
| 41842 | 10.21233/hcna-tv25 |
| 3927  | 10.21233/hd31-6942 |
| 15081 | 10.21233/hdeg-rn31 |
| 16236 | 10.21233/hf5z-sc17 |
| 4421  | 10.21233/hfmb-2e61 |
| 24188 | 10.21233/hfzm-9410 |
| 25384 | 10.21233/hg69-1m77 |
| 22976 | 10.21233/hga1-m504 |
| 24305 | 10.21233/hgah-yb23 |
| 26501 | 10.21233/hgw1-8c70 |
| 4435  | 10.21233/hhdq-x585 |
| 24183 | 10.21233/hhxv-jy21 |
| 4086  | 10.21233/hk80-jj60 |
| 15417 | 10.21233/hkn5-4a59 |
| 21553 | 10.21233/hmq8-hm34 |
| 22400 | 10.21233/hnsc-1p36 |
| 15302 | 10.21233/hpc1-5c65 |
| 44896 | 10.21233/hpgt-nm06 |
| 41264 | 10.21233/hqp0-6z14 |
| 39749 | 10.21233/hr41-mn70 |
| 15776 | 10.21233/hrkc-qm74 |

|       |                    |
|-------|--------------------|
| 20014 | 10.21233/hsdf-hx86 |
| 41235 | 10.21233/htm2-cw28 |
| 15157 | 10.21233/htpm-ac79 |
| 21893 | 10.21233/hvvv-sy31 |
| 15074 | 10.21233/hwnh-8509 |
| 1578  | 10.21233/hxd2-5546 |
| 24157 | 10.21233/hxme-qv81 |
| 22330 | 10.21233/hyt5-1v77 |
| 17326 | 10.21233/j01p-4677 |
| 23008 | 10.21233/j0sm-9z75 |
| 14645 | 10.21233/j0zd-6071 |
| 17396 | 10.21233/j12t-e851 |
| 24143 | 10.21233/j1k9-2922 |
| 14410 | 10.21233/j2hz-1p75 |
| 14626 | 10.21233/j36k-8t44 |
| 40441 | 10.21233/j3jg-qz14 |
| 24848 | 10.21233/j4jk-zw12 |
| 22714 | 10.21233/j5ga-dr77 |
| 24360 | 10.21233/j694-t641 |
| 41499 | 10.21233/j6p7-zb53 |
| 41226 | 10.21233/j71m-0095 |
| 15290 | 10.21233/j8q3-sm07 |
| 24390 | 10.21233/j97k-ds95 |
| 24256 | 10.21233/j9as-rt69 |
| 40861 | 10.21233/ja1n-6b46 |
| 4555  | 10.21233/jact-n751 |
| 15789 | 10.21233/jc66-m526 |
| 20068 | 10.21233/jcdm-8a49 |
| 3926  | 10.21233/jdgv-9y34 |
| 24576 | 10.21233/jdtq-9666 |
| 10967 | 10.21233/je2r-dk10 |
| 25477 | 10.21233/jec9-1e73 |
| 4017  | 10.21233/jf00-3j79 |
| 4138  | 10.21233/jgh0-2062 |
| 3892  | 10.21233/jgxs-ey74 |
| 3941  | 10.21233/jhaq-tk78 |
| 15597 | 10.21233/jhh6-7q75 |
| 16184 | 10.21233/jhwb-y436 |
| 4493  | 10.21233/jjat-b004 |
| 41283 | 10.21233/jjez-hm35 |
| 4071  | 10.21233/jkhn-6f57 |
| 41163 | 10.21233/jky8-1c56 |
| 40958 | 10.21233/jm6d-3395 |

|       |                    |
|-------|--------------------|
| 22642 | 10.21233/jm78-za93 |
| 15931 | 10.21233/jmze-9037 |
| 4156  | 10.21233/jnne-vy86 |
| 21788 | 10.21233/jnyr-4x96 |
| 41467 | 10.21233/jpfc-1908 |
| 19967 | 10.21233/jqgd-sd88 |
| 41389 | 10.21233/jqs1-hj70 |
| 24042 | 10.21233/jrvd-m892 |
| 24526 | 10.21233/jsc2-rn41 |
| 16177 | 10.21233/jsh7-n919 |
| 24034 | 10.21233/jsj1-4861 |
| 40976 | 10.21233/jvxc-rw58 |
| 24461 | 10.21233/jvxq-h196 |
| 22973 | 10.21233/jvze-zx40 |
| 46445 | 10.21233/jw93-c102 |
| 42555 | 10.21233/jwt1-1r97 |
| 22964 | 10.21233/jxea-ce51 |
| 21606 | 10.21233/jxj8-mf14 |
| 20188 | 10.21233/jyp9-k385 |
| 22698 | 10.21233/jyz6-4566 |
| 4306  | 10.21233/k0vt-tc67 |
| 4010  | 10.21233/k0xz-ct85 |
| 23000 | 10.21233/k1e4-xe95 |
| 40111 | 10.21233/k2nt-2b74 |
| 24857 | 10.21233/k38b-1167 |
| 4398  | 10.21233/k41y-rh60 |
| 15489 | 10.21233/k4wy-0k33 |
| 4467  | 10.21233/k4zb-ze21 |
| 15892 | 10.21233/k58q-9d96 |
| 42692 | 10.21233/k65h-1n80 |
| 21762 | 10.21233/k9vz-2659 |
| 14554 | 10.21233/ka3z-1h69 |
| 24842 | 10.21233/kakk-r623 |
| 34553 | 10.21233/kb77-8r67 |
| 19266 | 10.21233/kcep-vj71 |
| 4114  | 10.21233/kdkc-ke07 |
| 41320 | 10.21233/ke7a-vf58 |
| 21744 | 10.21233/kefv-nq34 |
| 22892 | 10.21233/keqf-m247 |
| 25468 | 10.21233/kf0z-p180 |
| 41399 | 10.21233/kfbq-jw42 |
| 24323 | 10.21233/kfxk-5f39 |
| 19906 | 10.21233/khvf-ha85 |

|       |                    |
|-------|--------------------|
| 15185 | 10.21233/kkjd-pf71 |
| 14527 | 10.21233/kkn8-9202 |
| 3953  | 10.21233/kmvh-v620 |
| 45170 | 10.21233/kn4a-fd55 |
| 42689 | 10.21233/kngt-v975 |
| 39364 | 10.21233/kpgn-4r23 |
| 15350 | 10.21233/kph1-ps34 |
| 15970 | 10.21233/kq0a-zm89 |
| 17419 | 10.21233/krp4-jk87 |
| 17387 | 10.21233/krw5-yg76 |
| 40484 | 10.21233/kt03-8t61 |
| 20183 | 10.21233/kts9-1316 |
| 4174  | 10.21233/kvx4-xd52 |
| 17357 | 10.21233/kw77-m233 |
| 15814 | 10.21233/kxff-0a77 |
| 24622 | 10.21233/kzqk-jj13 |
| 15379 | 10.21233/m06f-by70 |
| 41634 | 10.21233/m0yb-sp15 |
| 15242 | 10.21233/m16f-gh96 |
| 24939 | 10.21233/m1n7-n027 |
| 3869  | 10.21233/m1s8-qh32 |
| 14997 | 10.21233/m1ty-fz61 |
| 41243 | 10.21233/m24p-3135 |
| 13032 | 10.21233/m2a2-qq61 |
| 40574 | 10.21233/m2sf-vp33 |
| 25455 | 10.21233/m32v-dn19 |
| 22966 | 10.21233/m3rj-t898 |
| 41161 | 10.21233/m3wr-jd95 |
| 25186 | 10.21233/m4nq-s295 |
| 19812 | 10.21233/m57c-a803 |
| 808   | 10.21233/m5dr-hs85 |
| 22887 | 10.21233/m5mg-k090 |
| 4139  | 10.21233/m5qy-sh73 |
| 21844 | 10.21233/m6at-pw62 |
| 3971  | 10.21233/m7cb-vr77 |
| 46475 | 10.21233/m7cc-0639 |
| 21651 | 10.21233/m7v2-ks06 |
| 22720 | 10.21233/m8cg-s095 |
| 14921 | 10.21233/m8m6-rn46 |
| 26321 | 10.21233/m8qj-bz64 |
| 22726 | 10.21233/m8xc-ez05 |
| 41140 | 10.21233/ma1q-f261 |
| 3972  | 10.21233/ma29-1k87 |

|       |                    |
|-------|--------------------|
| 22322 | 10.21233/mbbn-ff92 |
| 24551 | 10.21233/mbst-4266 |
| 15088 | 10.21233/mce3-kp31 |
| 22376 | 10.21233/mczv-f712 |
| 21903 | 10.21233/me0e-ze15 |
| 22896 | 10.21233/me4r-tx16 |
| 16231 | 10.21233/mf7y-nm83 |
| 4299  | 10.21233/mfht-2e09 |
| 41612 | 10.21233/mgtf-q479 |
| 15829 | 10.21233/mgv7-z770 |
| 14643 | 10.21233/mhdv-6n63 |
| 15005 | 10.21233/mhya-2v27 |
| 17334 | 10.21233/mj04-mx52 |
| 22751 | 10.21233/mjwh-t327 |
| 41262 | 10.21233/mjzm-jv11 |
| 4060  | 10.21233/mk13-rb17 |
| 45311 | 10.21233/mks1-mt36 |
| 40582 | 10.21233/mky9-a533 |
| 41446 | 10.21233/mmtn-dv23 |
| 4133  | 10.21233/mnay-8z91 |
| 25133 | 10.21233/mpd1-a275 |
| 22685 | 10.21233/mqcv-z280 |
| 29236 | 10.21233/mqh5-7z20 |
| 21708 | 10.21233/mqtv-9820 |
| 41199 | 10.21233/mrq9-0a25 |
| 4223  | 10.21233/mtkm-0h07 |
| 4446  | 10.21233/mtmk-d772 |
| 41314 | 10.21233/mw33-kd49 |
| 4201  | 10.21233/mybh-v067 |
| 3996  | 10.21233/mzrc-8w03 |
| 22718 | 10.21233/n0v4-yj40 |
| 25268 | 10.21233/n1n7-ya12 |
| 40634 | 10.21233/n1v6-tq67 |
| 239   | 10.21233/n3002s    |
| 1694  | 10.21233/n3016n    |
| 2328  | 10.21233/n3018d    |
| 3132  | 10.21233/n3020q    |
| 203   | 10.21233/n30302    |
| 2065  | 10.21233/n3036b    |
| 260   | 10.21233/n3040d    |
| 2297  | 10.21233/n30472    |
| 2905  | 10.21233/n3049t    |
| 802   | 10.21233/n3061g    |



|      |                 |
|------|-----------------|
| 1606 | 10.21233/n3064m |
| 1840 | 10.21233/n30650 |
| 225  | 10.21233/n30684 |
| 858  | 10.21233/n3070f |
| 1661 | 10.21233/n3073k |
| 365  | 10.21233/n30896 |
| 1805 | 10.21233/n30938 |
| 11   | 10.21233/n3097s |
| 823  | 10.21233/n3099j |
| 1442 | 10.21233/n30b1v |
| 1860 | 10.21233/n30b3m |
| 2663 | 10.21233/n30b5c |
| 1574 | 10.21233/n30d2x |
| 2054 | 10.21233/n30f3n |
| 332  | 10.21233/n30g64 |
| 1144 | 10.21233/n30g8w |
| 1543 | 10.21233/n30h06 |
| 1769 | 10.21233/n30h1k |
| 790  | 10.21233/n30h6g |
| 1595 | 10.21233/n30h9m |
| 2022 | 10.21233/n30j0j |
| 2627 | 10.21233/n30j29 |
| 298  | 10.21233/n30k65 |
| 518  | 10.21233/n30k7j |
| 1965 | 10.21233/n30m1m |
| 2364 | 10.21233/n30m3c |
| 354  | 10.21233/n30m6h |
| 1563 | 10.21233/n30n0k |
| 2596 | 10.21233/n30n3q |
| 2332 | 10.21233/n30q1n |
| 540  | 10.21233/n30q55 |
| 1987 | 10.21233/n30q9p |
| 2385 | 10.21233/n30r10 |
| 1697 | 10.21233/n30s80 |
| 507  | 10.21233/n30t3f |
| 1133 | 10.21233/n30t6k |
| 230  | 10.21233/n30w34 |
| 1664 | 10.21233/n30w7n |
| 287  | 10.21233/n30x23 |
| 688  | 10.21233/n30x3g |
| 1718 | 10.21233/n30x70 |
| 3558 | 10.21233/n30z2f |
| 1445 | 10.21233/n3106m |

|      |                 |
|------|-----------------|
| 1864 | 10.21233/n31070 |
| 2267 | 10.21233/n3108c |
| 68   | 10.21233/n3110p |
| 1632 | 10.21233/n31358 |
| 1831 | 10.21233/n3136n |
| 850  | 10.21233/n3142g |
| 1886 | 10.21233/n3145m |
| 2289 | 10.21233/n31460 |
| 1598 | 10.21233/n3164x |
| 2025 | 10.21233/n31659 |
| 2630 | 10.21233/n3168f |
| 1434 | 10.21233/n3173w |
| 1852 | 10.21233/n3175n |
| 978  | 10.21233/n3191t |
| 1795 | 10.21233/n3194z |
| 1621 | 10.21233/n31b2j |
| 2650 | 10.21233/n31b62 |
| 3050 | 10.21233/n31b7f |
| 3452 | 10.21233/n31b8t |
| 1566 | 10.21233/n31d1v |
| 2388 | 10.21233/n31d40 |
| 1001 | 10.21233/n31d9w |
| 1819 | 10.21233/n31f2k |
| 2619 | 10.21233/n31f4b |
| 324  | 10.21233/n31g7t |
| 1136 | 10.21233/n31g9k |
| 1587 | 10.21233/n31h9x |
| 510  | 10.21233/n31k6g |
| 691  | 10.21233/n31k7v |
| 1158 | 10.21233/n31m8k |
| 1979 | 10.21233/n31n0w |
| 2588 | 10.21233/n31n31 |
| 1688 | 10.21233/n31p9n |
| 2323 | 10.21233/n31q1z |
| 311  | 10.21233/n31q3q |
| 532  | 10.21233/n31q43 |
| 2955 | 10.21233/n31r32 |
| 3582 | 10.21233/n31r5t |
| 254  | 10.21233/n31s4s |
| 1890 | 10.21233/n31s9p |
| 2292 | 10.21233/n31t10 |
| 496  | 10.21233/n31t44 |
| 1522 | 10.21233/n31t78 |

|      |                 |
|------|-----------------|
| 219  | 10.21233/n31w22 |
| 853  | 10.21233/n31w4t |
| 1254 | 10.21233/n31w6k |
| 1656 | 10.21233/n31w7z |
| 278  | 10.21233/n31x2d |
| 2312 | 10.21233/n31x92 |
| 818  | 10.21233/n3203s |
| 1437 | 10.21233/n3205j |
| 2888 | 10.21233/n3219d |
| 2049 | 10.21233/n3236z |
| 2622 | 10.21233/n32393 |
| 841  | 10.21233/n3242s |
| 3483 | 10.21233/n3250c |
| 1590 | 10.21233/n32647 |
| 2017 | 10.21233/n3265m |
| 1844 | 10.21233/n32736 |
| 2642 | 10.21233/n3277q |
| 1161 | 10.21233/n3290r |
| 1786 | 10.21233/n3293w |
| 2591 | 10.21233/n3295n |
| 993  | 10.21233/n32995 |
| 1611 | 10.21233/n32b1g |
| 3042 | 10.21233/n32b50 |
| 314  | 10.21233/n32c8g |
| 535  | 10.21233/n32c9v |
| 1982 | 10.21233/n32d3x |
| 369  | 10.21233/n32d8t |
| 772  | 10.21233/n32d96 |
| 1810 | 10.21233/n32f38 |
| 2611 | 10.21233/n32f51 |
| 720  | 10.21233/n32g8h |
| 2348 | 10.21233/n32h3z |
| 336  | 10.21233/n32h63 |
| 1773 | 10.21233/n32j05 |
| 2579 | 10.21233/n32j4p |
| 281  | 10.21233/n32k5d |
| 1149 | 10.21233/n32m8w |
| 1547 | 10.21233/n32m98 |
| 1969 | 10.21233/n32n06 |
| 2368 | 10.21233/n32n1k |
| 1679 | 10.21233/n32p9z |
| 303  | 10.21233/n32q4d |
| 32   | 10.21233/n32s3q |

|      |                 |
|------|-----------------|
| 267  | 10.21233/n32t32 |
| 488  | 10.21233/n32t4f |
| 1701 | 10.21233/n32t7k |
| 210  | 10.21233/n32w2c |
| 1648 | 10.21233/n32w78 |
| 1847 | 10.21233/n32w8n |
| 672  | 10.21233/n32x33 |
| 9    | 10.21233/n3301b |
| 1615 | 10.21233/n33067 |
| 2645 | 10.21233/n33109 |
| 1450 | 10.21233/n33156 |
| 1868 | 10.21233/n3317z |
| 2614 | 10.21233/n33381 |
| 2061 | 10.21233/n33457 |
| 3468 | 10.21233/n3350p |
| 1581 | 10.21233/n33635 |
| 1776 | 10.21233/n3364j |
| 2006 | 10.21233/n3365x |
| 339  | 10.21233/n33894 |
| 525  | 10.21233/n33902 |
| 1153 | 10.21233/n3392t |
| 2371 | 10.21233/n3396b |
| 2583 | 10.21233/n3397q |
| 306  | 10.21233/n33c7d |
| 361  | 10.21233/n33d7r |
| 2603 | 10.21233/n33f5b |
| 1704 | 10.21233/n33h1h |
| 2340 | 10.21233/n33h38 |
| 328  | 10.21233/n33h51 |
| 271  | 10.21233/n33k63 |
| 675  | 10.21233/n33k8v |
| 514  | 10.21233/n33m6f |
| 3775 | 10.21233/n33n6s |
| 238  | 10.21233/n33p4c |
| 1671 | 10.21233/n33p98 |
| 294  | 10.21233/n33q4q |
| 1107 | 10.21233/n33q7v |
| 2327 | 10.21233/n33r1x |
| 835  | 10.21233/n33s5s |
| 2673 | 10.21233/n33t1m |
| 259  | 10.21233/n33t20 |
| 2904 | 10.21233/n33v1z |
| 202  | 10.21233/n33w32 |

|      |                 |
|------|-----------------|
| 2637 | 10.21233/n33x21 |
| 857  | 10.21233/n33x55 |
| 1894 | 10.21233/n33x9p |
| 3500 | 10.21233/n33z3r |
| 801  | 10.21233/n3403d |
| 224  | 10.21233/n3410m |
| 1441 | 10.21233/n34144 |
| 1859 | 10.21233/n3415h |
| 364  | 10.21233/n34309 |
| 1804 | 10.21233/n34356 |
| 1010 | 10.21233/n34411 |
| 1628 | 10.21233/n3443s |
| 2053 | 10.21233/n34445 |
| 3060 | 10.21233/n34479 |
| 331  | 10.21233/n3460b |
| 1768 | 10.21233/n3464v |
| 2396 | 10.21233/n34670 |
| 788  | 10.21233/n34712 |
| 1594 | 10.21233/n34746 |
| 1826 | 10.21233/n3475k |
| 2626 | 10.21233/n3477b |
| 517  | 10.21233/n3489f |
| 1542 | 10.21233/n3493h |
| 1964 | 10.21233/n3494w |
| 2363 | 10.21233/n34958 |
| 352  | 10.21233/n3498d |
| 974  | 10.21233/n34b0q |
| 1791 | 10.21233/n34b2g |
| 1111 | 10.21233/n34c9g |
| 1733 | 10.21233/n34d25 |
| 539  | 10.21233/n34d72 |
| 1562 | 10.21233/n34f14 |
| 1986 | 10.21233/n34f2h |
| 2384 | 10.21233/n34f3w |
| 1696 | 10.21233/n34h1t |
| 318  | 10.21233/n34h6q |
| 1755 | 10.21233/n34j15 |
| 860  | 10.21233/n34k85 |
| 285  | 10.21233/n34m6r |
| 506  | 10.21233/n34m74 |
| 2352 | 10.21233/n34n2k |
| 3557 | 10.21233/n34n63 |
| 1444 | 10.21233/n34p7t |

|      |                 |
|------|-----------------|
| 1663 | 10.21233/n34p86 |
| 1862 | 10.21233/n34p9k |
| 2319 | 10.21233/n34r0v |
| 1631 | 10.21233/n34s87 |
| 2266 | 10.21233/n34t0j |
| 2665 | 10.21233/n34t29 |
| 250  | 10.21233/n34t3p |
| 1684 | 10.21233/n34t76 |
| 1885 | 10.21233/n34t8k |
| 792  | 10.21233/n34w54 |
| 2629 | 10.21233/n34x1z |
| 215  | 10.21233/n34x3q |
| 849  | 10.21233/n34x5g |
| 977  | 10.21233/n3503q |
| 1794 | 10.21233/n3506v |
| 1433 | 10.21233/n3515t |
| 2649 | 10.21233/n3518z |
| 356  | 10.21233/n35310 |
| 543  | 10.21233/n3532c |
| 2598 | 10.21233/n35391 |
| 1000 | 10.21233/n3542q |
| 1818 | 10.21233/n3545v |
| 2045 | 10.21233/n35467 |
| 1135 | 10.21233/n3562d |
| 2013 | 10.21233/n3574h |
| 2618 | 10.21233/n3577n |
| 509  | 10.21233/n3589r |
| 2355 | 10.21233/n3595k |
| 343  | 10.21233/n3597b |
| 966  | 10.21233/n35993 |
| 1157 | 10.21233/n35b01 |
| 2587 | 10.21233/n35b4j |
| 531  | 10.21233/n35d8r |
| 3790 | 10.21233/n35f83 |
| 253  | 10.21233/n35g6p |
| 1687 | 10.21233/n35h14 |
| 495  | 10.21233/n35h7d |
| 715  | 10.21233/n35h8s |
| 2954 | 10.21233/n35j50 |
| 852  | 10.21233/n35k73 |
| 1655 | 10.21233/n35m0s |
| 1889 | 10.21233/n35m15 |
| 679  | 10.21233/n35m5p |

|      |                 |
|------|-----------------|
| 1709 | 10.21233/n35m96 |
| 2922 | 10.21233/n35n38 |
| 3149 | 10.21233/n35n4n |
| 1854 | 10.21233/n35q0t |
| 2652 | 10.21233/n35q4b |
| 873  | 10.21233/n35q7g |
| 2311 | 10.21233/n35r2x |
| 1003 | 10.21233/n35s6s |
| 1623 | 10.21233/n35s8j |
| 2048 | 10.21233/n35s9x |
| 27   | 10.21233/n35t17 |
| 782  | 10.21233/n35w3p |
| 2016 | 10.21233/n35w8k |
| 206  | 10.21233/n35x18 |
| 1028 | 10.21233/n35x4d |
| 2068 | 10.21233/n35x7j |
| 3482 | 10.21233/n35z20 |
| 346  | 10.21233/n3602n |
| 969  | 10.21233/n3604d |
| 2590 | 10.21233/n36099 |
| 805  | 10.21233/n36120 |
| 1610 | 10.21233/n36154 |
| 1843 | 10.21233/n3616h |
| 3041 | 10.21233/n3620k |
| 534  | 10.21233/n36319 |
| 1160 | 10.21233/n3634f |
| 1981 | 10.21233/n36366 |
| 2378 | 10.21233/n3637k |
| 1391 | 10.21233/n3643d |
| 1809 | 10.21233/n3644s |
| 2610 | 10.21233/n3647x |
| 313  | 10.21233/n36591 |
| 719  | 10.21233/n3660z |
| 1524 | 10.21233/n36633 |
| 1577 | 10.21233/n3673f |
| 2001 | 10.21233/n3674t |
| 2347 | 10.21233/n3695w |
| 335  | 10.21233/n36981 |
| 1148 | 10.21233/n36b0b |
| 1546 | 10.21233/n36b23 |
| 1772 | 10.21233/n36b3g |
| 1968 | 10.21233/n36b4v |
| 2578 | 10.21233/n36b6m |

|      |                 |
|------|-----------------|
| 682  | 10.21233/n36c93 |
| 876  | 10.21233/n36d01 |
| 2314 | 10.21233/n36d5x |
| 302  | 10.21233/n36d82 |
| 2367 | 10.21233/n36f4w |
| 245  | 10.21233/n36g60 |
| 1880 | 10.21233/n36h1f |
| 2335 | 10.21233/n36j25 |
| 31   | 10.21233/n36k5n |
| 209  | 10.21233/n36k61 |
| 843  | 10.21233/n36k8s |
| 671  | 10.21233/n36m6c |
| 1904 | 10.21233/n36n0f |
| 8    | 10.21233/n36p49 |
| 2644 | 10.21233/n36q38 |
| 234  | 10.21233/n36q51 |
| 1667 | 10.21233/n36q9j |
| 2303 | 10.21233/n36r1v |
| 995  | 10.21233/n36s5q |
| 1397 | 10.21233/n36s63 |
| 1448 | 10.21233/n36t7t |
| 1867 | 10.21233/n36t86 |
| 2669 | 10.21233/n36v0h |
| 3074 | 10.21233/n36v28 |
| 774  | 10.21233/n36w5r |
| 1580 | 10.21233/n36w7h |
| 2005 | 10.21233/n36w8w |
| 1635 | 10.21233/n36x6g |
| 1152 | 10.21233/n3704q |
| 1775 | 10.21233/n3706g |
| 796  | 10.21233/n3713p |
| 1601 | 10.21233/n3715f |
| 2633 | 10.21233/n3719z |
| 3033 | 10.21233/n3720w |
| 1549 | 10.21233/n3734r |
| 1972 | 10.21233/n3736h |
| 490  | 10.21233/n3761n |
| 547  | 10.21233/n37710 |
| 1569 | 10.21233/n37744 |
| 1763 | 10.21233/n3775h |
| 269  | 10.21233/n37880 |
| 1703 | 10.21233/n3793f |
| 327  | 10.21233/n3797z |

|      |                 |
|------|-----------------|
| 513  | 10.21233/n3798b |
| 1139 | 10.21233/n37b0n |
| 1959 | 10.21233/n37b2d |
| 3774 | 10.21233/n37b92 |
| 867  | 10.21233/n37c9d |
| 1670 | 10.21233/n37d23 |
| 699  | 10.21233/n37d70 |
| 1105 | 10.21233/n37d9r |
| 1725 | 10.21233/n37f12 |
| 3565 | 10.21233/n37f7b |
| 20   | 10.21233/n37g69 |
| 2326 | 10.21233/n37j47 |
| 3130 | 10.21233/n37j60 |
| 834  | 10.21233/n37k7q |
| 1639 | 10.21233/n37m0d |
| 2063 | 10.21233/n37m1s |
| 258  | 10.21233/n37m4x |
| 2903 | 10.21233/n37n48 |
| 1604 | 10.21233/n37p9h |
| 1837 | 10.21233/n37q0f |
| 856  | 10.21233/n37q6q |
| 1659 | 10.21233/n37q9v |
| 3499 | 10.21233/n37r5p |
| 363  | 10.21233/n37s4n |
| 987  | 10.21233/n37s6d |
| 1803 | 10.21233/n37s85 |
| 821  | 10.21233/n37t40 |
| 1440 | 10.21233/n37t6r |
| 1627 | 10.21233/n37t74 |
| 2262 | 10.21233/n37v0t |
| 2661 | 10.21233/n37v16 |
| 550  | 10.21233/n37w39 |
| 1572 | 10.21233/n37w7t |
| 2395 | 10.21233/n37w9k |
| 1008 | 10.21233/n37x41 |
| 2625 | 10.21233/n37x9x |
| 330  | 10.21233/n3801w |
| 1142 | 10.21233/n3803n |
| 1541 | 10.21233/n3805d |
| 973  | 10.21233/n38130 |
| 3840 | 10.21233/n3822z |
| 516  | 10.21233/n38329 |
| 1732 | 10.21233/n3835f |

|      |                 |
|------|-----------------|
| 2362 | 10.21233/n38376 |
| 351  | 10.21233/n3840w |
| 2594 | 10.21233/n3848x |
| 317  | 10.21233/n3870x |
| 538  | 10.21233/n38719 |
| 1754 | 10.21233/n3874f |
| 261  | 10.21233/n38889 |
| 1695 | 10.21233/n3892c |
| 1897 | 10.21233/n3893r |
| 723  | 10.21233/n3898n |
| 2351 | 10.21233/n38b4g |
| 2962 | 10.21233/n38b67 |
| 226  | 10.21233/n38c8b |
| 1716 | 10.21233/n38f2r |
| 1443 | 10.21233/n38h12 |
| 2265 | 10.21233/n38h3t |
| 880  | 10.21233/n38h93 |
| 1683 | 10.21233/n38j1d |
| 2318 | 10.21233/n38j35 |
| 1013 | 10.21233/n38k71 |
| 1630 | 10.21233/n38k9s |
| 1829 | 10.21233/n38m0q |
| 847  | 10.21233/n38m5m |
| 2287 | 10.21233/n38n02 |
| 791  | 10.21233/n38p72 |
| 2023 | 10.21233/n38q0r |
| 1432 | 10.21233/n38q7d |
| 1651 | 10.21233/n38q8s |
| 1850 | 10.21233/n38q95 |
| 355  | 10.21233/n38s3k |
| 976  | 10.21233/n38s5b |
| 1793 | 10.21233/n38s8g |
| 813  | 10.21233/n38t5p |
| 3048 | 10.21233/n38v2w |
| 1564 | 10.21233/n38w6r |
| 1758 | 10.21233/n38w74 |
| 375  | 10.21233/n38x16 |
| 778  | 10.21233/n38x2k |
| 999  | 10.21233/n38x3z |
| 1817 | 10.21233/n38x63 |
| 2617 | 10.21233/n38x8v |
| 321  | 10.21233/n3902k |
| 1780 | 10.21233/n3917t |

|      |                 |
|------|-----------------|
| 3611 | 10.21233/n39228 |
| 3830 | 10.21233/n3923n |
| 1719 | 10.21233/n3935r |
| 342  | 10.21233/n39398 |
| 530  | 10.21233/n39406 |
| 1156 | 10.21233/n3942z |
| 1553 | 10.21233/n3943b |
| 1976 | 10.21233/n3944q |
| 2586 | 10.21233/n3947v |
| 69   | 10.21233/n3959z |
| 309  | 10.21233/n39699 |
| 2953 | 10.21233/n3977w |
| 252  | 10.21233/n39890 |
| 1888 | 10.21233/n3994f |
| 2290 | 10.21233/n3995t |
| 1520 | 10.21233/n39b21 |
| 2343 | 10.21233/n39b55 |
| 1654 | 10.21233/n39d2q |
| 275  | 10.21233/n39d67 |
| 678  | 10.21233/n39d80 |
| 2920 | 10.21233/n39f6k |
| 816  | 10.21233/n39g8p |
| 1435 | 10.21233/n39h00 |
| 1622 | 10.21233/n39h1c |
| 2047 | 10.21233/n39h34 |
| 2651 | 10.21233/n39h5w |
| 872  | 10.21233/n39h81 |
| 1674 | 10.21233/n39j1q |
| 381  | 10.21233/n39k6z |
| 1002 | 10.21233/n39k8q |
| 1820 | 10.21233/n39m01 |
| 25   | 10.21233/n39m4j |
| 3081 | 10.21233/n39n4w |
| 968  | 10.21233/n39p7c |
| 2015 | 10.21233/n39q1f |
| 205  | 10.21233/n39q4k |
| 1842 | 10.21233/n39q9g |
| 345  | 10.21233/n39s3w |
| 1783 | 10.21233/n39s7d |
| 1980 | 10.21233/n39s8s |
| 804  | 10.21233/n39t37 |
| 1390 | 10.21233/n39t6c |
| 3040 | 10.21233/n39v1t |

|      |                 |
|------|-----------------|
| 312  | 10.21233/n39w3x |
| 2377 | 10.21233/n39w96 |
| 1807 | 10.21233/n39x6d |
| 2609 | 10.21233/n39x9j |
| 497  | 10.21233/n3b02w |
| 1523 | 10.21233/n3b07s |
| 1771 | 10.21233/n3b16r |
| 279  | 10.21233/n3b305 |
| 681  | 10.21233/n3b31j |
| 1711 | 10.21233/n3b34p |
| 1545 | 10.21233/n3b441 |
| 1967 | 10.21233/n3b45d |
| 3781 | 10.21233/n3b517 |
| 1114 | 10.21233/n3b729 |
| 1736 | 10.21233/n3b742 |
| 2945 | 10.21233/n3b78k |
| 1879 | 10.21233/n3b94r |
| 7    | 10.21233/n3bc7k |
| 208  | 10.21233/n3bc8z |
| 1030 | 10.21233/n3bd08 |
| 1646 | 10.21233/n3bd21 |
| 1845 | 10.21233/n3bd3d |
| 2643 | 10.21233/n3bh56 |
| 16   | 10.21233/n3bh6k |
| 232  | 10.21233/n3bh7z |
| 1447 | 10.21233/n3bj0n |
| 1666 | 10.21233/n3bj11 |
| 1866 | 10.21233/n3bj2d |
| 773  | 10.21233/n3bk68 |
| 994  | 10.21233/n3bk7n |
| 1393 | 10.21233/n3bk9d |
| 2612 | 10.21233/n3bm23 |
| 829  | 10.21233/n3bm6m |
| 2270 | 10.21233/n3bn0p |
| 1579 | 10.21233/n3bp82 |
| 2004 | 10.21233/n3bq0c |
| 2632 | 10.21233/n3br0q |
| 3032 | 10.21233/n3br2g |
| 337  | 10.21233/n3bs4k |
| 523  | 10.21233/n3bs5z |
| 1970 | 10.21233/n3bs9g |
| 2369 | 10.21233/n3bt1s |
| 2580 | 10.21233/n3bt25 |

|      |                 |
|------|-----------------|
| 982  | 10.21233/n3bt6p |
| 304  | 10.21233/n3bw2v |
| 1171 | 10.21233/n3bx4z |
| 1568 | 10.21233/n3bx5b |
| 2391 | 10.21233/n3bx8g |
| 489  | 10.21233/n3c026 |
| 1513 | 10.21233/n3c05b |
| 2338 | 10.21233/n3c09v |
| 1138 | 10.21233/n3c149 |
| 1762 | 10.21233/n3c162 |
| 268  | 10.21233/n3c31v |
| 673  | 10.21233/n3c33m |
| 1906 | 10.21233/n3c36r |
| 1724 | 10.21233/n3c45q |
| 1958 | 10.21233/n3c463 |
| 2358 | 10.21233/n3c48v |
| 236  | 10.21233/n3c59k |
| 866  | 10.21233/n3c61w |
| 693  | 10.21233/n3c70v |
| 1104 | 10.21233/n3c717 |
| 19   | 10.21233/n3c887 |
| 1451 | 10.21233/n3c929 |
| 1637 | 10.21233/n3c93p |
| 2671 | 10.21233/n3c976 |
| 1691 | 10.21233/n3cb31 |
| 2902 | 10.21233/n3cb65 |
| 200  | 10.21233/n3cc88 |
| 1836 | 10.21233/n3cd3q |
| 2635 | 10.21233/n3cd6v |
| 1658 | 10.21233/n3cf2p |
| 1892 | 10.21233/n3cf32 |
| 3497 | 10.21233/n3cf8z |
| 799  | 10.21233/n3cg89 |
| 986  | 10.21233/n3cg9p |
| 1603 | 10.21233/n3ch2c |
| 2030 | 10.21233/n3ch3r |
| 1439 | 10.21233/n3cj0z |
| 1857 | 10.21233/n3cj1b |
| 2476 | 10.21233/n3cj33 |
| 2660 | 10.21233/n3cj4g |
| 1571 | 10.21233/n3ck8b |
| 1802 | 10.21233/n3ck9q |
| 820  | 10.21233/n3cm5j |

|      |                 |
|------|-----------------|
| 1626 | 10.21233/n3cm92 |
| 3058 | 10.21233/n3cn34 |
| 329  | 10.21233/n3cp57 |
| 549  | 10.21233/n3cp6m |
| 1766 | 10.21233/n3cq0p |
| 785  | 10.21233/n3cq6z |
| 1592 | 10.21233/n3cq8q |
| 1824 | 10.21233/n3cq93 |
| 2624 | 10.21233/n3cr2s |
| 3839 | 10.21233/n3cr69 |
| 1141 | 10.21233/n3cs6n |
| 1961 | 10.21233/n3cs9s |
| 2361 | 10.21233/n3ct0q |
| 350  | 10.21233/n3ct3v |
| 1789 | 10.21233/n3ct8r |
| 2593 | 10.21233/n3cv1f |
| 701  | 10.21233/n3cw3j |
| 537  | 10.21233/n3cx14 |
| 1984 | 10.21233/n3cx61 |
| 2382 | 10.21233/n3cx7d |
| 316  | 10.21233/n3d12v |
| 2961 | 10.21233/n3d20f |
| 1715 | 10.21233/n3d451 |
| 2317 | 10.21233/n3d752 |
| 1883 | 10.21233/n3db4q |
| 1650 | 10.21233/n3df07 |
| 2286 | 10.21233/n3df20 |
| 3488 | 10.21233/n3df7w |
| 1849 | 10.21233/n3dj08 |
| 2647 | 10.21233/n3dj21 |
| 3047 | 10.21233/n3dj3d |
| 998  | 10.21233/n3dm80 |
| 1815 | 10.21233/n3dn1p |
| 374  | 10.21233/n3dq34 |
| 777  | 10.21233/n3dq5w |
| 2011 | 10.21233/n3dq81 |
| 341  | 10.21233/n3dt35 |
| 1155 | 10.21233/n3dt69 |
| 1778 | 10.21233/n3dt82 |
| 3610 | 10.21233/n3dv4w |
| 527  | 10.21233/n3dx36 |
| 2373 | 10.21233/n3dz0d |
| 308  | 10.21233/n3f11s |

|      |                 |
|------|-----------------|
| 493  | 10.21233/n3f125 |
| 2342 | 10.21233/n3f172 |
| 677  | 10.21233/n3f40f |
| 1707 | 10.21233/n3f45b |
| 2919 | 10.21233/n3f48g |
| 871  | 10.21233/n3f71v |
| 24   | 10.21233/n3f97t |
| 240  | 10.21233/n3f986 |
| 2885 | 10.21233/n3fb75 |
| 204  | 10.21233/n3fd53 |
| 1024 | 10.21233/n3fd87 |
| 1642 | 10.21233/n3ff1x |
| 3080 | 10.21233/n3ff5f |
| 803  | 10.21233/n3fh88 |
| 1607 | 10.21233/n3fj0k |
| 1841 | 10.21233/n3fj1z |
| 3039 | 10.21233/n3fj5g |
| 1806 | 10.21233/n3fn0m |
| 333  | 10.21233/n3ft4v |
| 1770 | 10.21233/n3ft8c |
| 1966 | 10.21233/n3ft9r |
| 2576 | 10.21233/n3fv12 |
| 299  | 10.21233/n3fx24 |
| 519  | 10.21233/n3fx3h |
| 1735 | 10.21233/n3fx71 |
| 2944 | 10.21233/n3g194 |
| 3138 | 10.21233/n3g202 |
| 1698 | 10.21233/n3g45n |
| 15   | 10.21233/n3g974 |
| 828  | 10.21233/n3g99w |
| 2268 | 10.21233/n3gb4b |
| 1633 | 10.21233/n3gf17 |
| 1832 | 10.21233/n3gf2m |
| 1599 | 10.21233/n3gh9z |
| 2026 | 10.21233/n3gj0w |
| 2631 | 10.21233/n3gj2n |
| 3031 | 10.21233/n3gj4d |
| 1796 | 10.21233/n3gn0x |
| 1137 | 10.21233/n3gt6x |
| 3563 | 10.21233/n3gz35 |
| 2324 | 10.21233/n3h182 |
| 3126 | 10.21233/n3h20c |
| 256  | 10.21233/n3h402 |

|      |                 |
|------|-----------------|
| 1891 | 10.21233/n3h45z |
| 2293 | 10.21233/n3h46b |
| 2901 | 10.21233/n3h49g |
| 221  | 10.21233/n3h68s |
| 1255 | 10.21233/n3h72v |
| 1438 | 10.21233/n3h737 |
| 1657 | 10.21233/n3h74m |
| 1856 | 10.21233/n3hb38 |
| 2050 | 10.21233/n3hb4n |
| 2654 | 10.21233/n3hb6d |
| 3056 | 10.21233/n3hb7s |
| 784  | 10.21233/n3hd97 |
| 1006 | 10.21233/n3hf05 |
| 2623 | 10.21233/n3hf52 |
| 971  | 10.21233/n3hh7h |
| 1591 | 10.21233/n3hj06 |
| 1162 | 10.21233/n3hm8x |
| 1559 | 10.21233/n3hm99 |
| 1788 | 10.21233/n3hn07 |
| 315  | 10.21233/n3hq32 |
| 536  | 10.21233/n3hq4f |
| 2381 | 10.21233/n3hr08 |
| 2960 | 10.21233/n3hr3d |
| 501  | 10.21233/n3ht33 |
| 684  | 10.21233/n3hx4h |
| 878  | 10.21233/n3j13g |
| 1680 | 10.21233/n3j157 |
| 33   | 10.21233/n3j39f |
| 1882 | 10.21233/n3j458 |
| 3487 | 10.21233/n3j50q |
| 212  | 10.21233/n3j69g |
| 1033 | 10.21233/n3j71s |
| 811  | 10.21233/n3j99h |
| 1617 | 10.21233/n3jb1t |
| 2646 | 10.21233/n3jb4z |
| 3046 | 10.21233/n3jb6q |
| 3861 | 10.21233/n3jb8g |
| 776  | 10.21233/n3jd85 |
| 997  | 10.21233/n3jd9j |
| 1814 | 10.21233/n3jf27 |
| 2615 | 10.21233/n3jf40 |
| 2007 | 10.21233/n3jj28 |
| 340  | 10.21233/n3jm53 |



|      |                 |
|------|-----------------|
| 1154 | 10.21233/n3jm87 |
| 1551 | 10.21233/n3jm9m |
| 1974 | 10.21233/n3jn0j |
| 307  | 10.21233/n3jq3c |
| 2951 | 10.21233/n3jr2b |
| 492  | 10.21233/n3jt55 |
| 1705 | 10.21233/n3jt89 |
| 2341 | 10.21233/n3jv10 |
| 272  | 10.21233/n3jx1p |
| 2884 | 10.21233/n3k18p |
| 3079 | 10.21233/n3k493 |
| 3473 | 10.21233/n3k501 |
| 2943 | 10.21233/n3kr31 |
| 3067 | 10.21233/n3m49d |
| 3561 | 10.21233/n3mn6f |
| 3771 | 10.21233/n3mn7t |
| 3125 | 10.21233/n3mv20 |
| 3494 | 10.21233/n3mz21 |
| 3054 | 10.21233/n3n48b |
| 2959 | 10.21233/n3nj5b |
| 2892 | 10.21233/n3nv29 |
| 3486 | 10.21233/n3nz2b |
| 2882 | 10.21233/n3pv17 |
| 3078 | 10.21233/n3pv2m |
| 3471 | 10.21233/n3pz18 |
| 2907 | 10.21233/n3qn37 |
| 3029 | 10.21233/n3r20j |
| 3493 | 10.21233/n3rr5b |
| 3454 | 10.21233/n3rv3m |
| 2925 | 10.21233/n3sf5j |
| 2890 | 10.21233/n3sj5k |
| 3485 | 10.21233/n3sn5m |
| 3859 | 10.21233/n3sv49 |
| 2949 | 10.21233/n3t77j |
| 3077 | 10.21233/n3tn4j |
| 3568 | 10.21233/n3v51w |
| 2906 | 10.21233/n3vb7w |
| 3559 | 10.21233/n3w516 |
| 3492 | 10.21233/n3wf8m |
| 3051 | 10.21233/n3wj5h |
| 3583 | 10.21233/n3wz3w |
| 2956 | 10.21233/n3x203 |
| 3484 | 10.21233/n3xf7j |

|       |                    |
|-------|--------------------|
| 3043  | 10.21233/n3xj4f    |
| 3858  | 10.21233/n3xj8z    |
| 2948  | 10.21233/n3z183    |
| 2880  | 10.21233/n3zb6f    |
| 3076  | 10.21233/n3zb7t    |
| 3035  | 10.21233/n3zj54    |
| 40875 | 10.21233/n4bq-p922 |
| 40997 | 10.21233/n4sd-es14 |
| 23006 | 10.21233/n4x8-0k74 |
| 41366 | 10.21233/n4xw-kd72 |
| 21535 | 10.21233/n4y2-m886 |
| 20495 | 10.21233/n5d1-mq43 |
| 26446 | 10.21233/n5nj-5q34 |
| 4087  | 10.21233/n6bg-kc41 |
| 20167 | 10.21233/n7jz-0g74 |
| 24236 | 10.21233/n87r-7a39 |
| 14999 | 10.21233/n8dz-y640 |
| 24590 | 10.21233/n8w1-xz08 |
| 4347  | 10.21233/n8z7-nx69 |
| 4216  | 10.21233/n9a0-fk75 |
| 24467 | 10.21233/n9vy-3c22 |
| 15415 | 10.21233/na70-nc19 |
| 4377  | 10.21233/nbg7-rk14 |
| 26507 | 10.21233/nbnz-tz48 |
| 14637 | 10.21233/nc0w-mk91 |
| 4081  | 10.21233/nc7w-an65 |
| 2069  | 10.21233/nda9-aw65 |
| 4173  | 10.21233/ndhk-ws14 |
| 24325 | 10.21233/nep1-3z35 |
| 24900 | 10.21233/nf08-bn61 |
| 24534 | 10.21233/nfah-4t91 |
| 41146 | 10.21233/ngxf-6p79 |
| 4057  | 10.21233/nkzg-w156 |
| 15115 | 10.21233/nm9j-w372 |
| 24559 | 10.21233/nmwt-fc53 |
| 15366 | 10.21233/nn1h-xp19 |
| 16269 | 10.21233/nn2g-qt23 |
| 4169  | 10.21233/nnyx-kj31 |
| 14494 | 10.21233/npm2-8d68 |
| 17859 | 10.21233/npmk-6h16 |
| 4481  | 10.21233/nq7x-mx79 |
| 22373 | 10.21233/nqb2-na71 |
| 22693 | 10.21233/nrd3-gj67 |

|       |                    |
|-------|--------------------|
| 15772 | 10.21233/nre4-q408 |
| 16086 | 10.21233/nrq0-e757 |
| 41201 | 10.21233/nrvm-5m89 |
| 21838 | 10.21233/nryw-9765 |
| 3890  | 10.21233/nsm3-eh40 |
| 25217 | 10.21233/nssh-az33 |
| 40999 | 10.21233/nt4c-9462 |
| 22982 | 10.21233/nt73-cr73 |
| 4502  | 10.21233/nvn7-f141 |
| 41604 | 10.21233/nwfm-st50 |
| 45629 | 10.21233/nwgq-s472 |
| 45281 | 10.21233/ny4b-e654 |
| 15635 | 10.21233/ny7s-f780 |
| 45383 | 10.21233/p0mn-7534 |
| 41230 | 10.21233/p1h4-4v17 |
| 22786 | 10.21233/p1tb-df93 |
| 4021  | 10.21233/p28f-qv78 |
| 15250 | 10.21233/p37m-jn82 |
| 41252 | 10.21233/p39d-rd93 |
| 25213 | 10.21233/p3md-9032 |
| 14529 | 10.21233/p4mc-9f34 |
| 20180 | 10.21233/p4nw-2d17 |
| 4549  | 10.21233/p4zh-1534 |
| 24281 | 10.21233/p5jz-zk41 |
| 4055  | 10.21233/p76r-3q63 |
| 16081 | 10.21233/p7fp-g179 |
| 22810 | 10.21233/p83k-v204 |
| 45200 | 10.21233/p8ac-sf20 |
| 24218 | 10.21233/p8jv-nx13 |
| 17340 | 10.21233/p96n-6v19 |
| 24846 | 10.21233/p9bs-0686 |
| 15649 | 10.21233/paxn-mh26 |
| 15746 | 10.21233/pbbn-5h88 |
| 24929 | 10.21233/pbc8-c366 |
| 25287 | 10.21233/pbmw-9s02 |
| 24626 | 10.21233/pbq8-yy15 |
| 16251 | 10.21233/pbwt-b156 |
| 15296 | 10.21233/pck3-ct03 |
| 16271 | 10.21233/pcmd-m560 |
| 25283 | 10.21233/pe6c-pb93 |
| 24277 | 10.21233/pegh-gp75 |
| 16063 | 10.21233/pfsb-bc85 |
| 24671 | 10.21233/pgj9-5v59 |

|       |                    |
|-------|--------------------|
| 32258 | 10.21233/pgwj-9f54 |
| 24348 | 10.21233/ph7f-8b78 |
| 25078 | 10.21233/ph7n-8m49 |
| 16217 | 10.21233/phdj-h055 |
| 4103  | 10.21233/phdz-hs08 |
| 44941 | 10.21233/phqc-me73 |
| 25344 | 10.21233/pht8-mj95 |
| 4504  | 10.21233/pj9k-qg05 |
| 45097 | 10.21233/pkhx-pf62 |
| 16179 | 10.21233/pkt4-am12 |
| 15371 | 10.21233/pn5c-9x40 |
| 18123 | 10.21233/pnbx-1e72 |
| 14928 | 10.21233/pps9-sn76 |
| 45636 | 10.21233/pr2m-cc37 |
| 14556 | 10.21233/ps1x-es22 |
| 15811 | 10.21233/psnq-xv46 |
| 14446 | 10.21233/ptaw-4d96 |
| 14768 | 10.21233/ptjw-d867 |
| 40439 | 10.21233/ptq6-q055 |
| 14930 | 10.21233/ptx4-dz18 |
| 4286  | 10.21233/pvn2-a273 |
| 25386 | 10.21233/pvpd-tm53 |
| 45219 | 10.21233/pwgs-4g85 |
| 22851 | 10.21233/pxem-ce07 |
| 15342 | 10.21233/pyjt-xa38 |
| 41280 | 10.21233/pys7-k313 |
| 4047  | 10.21233/q057-d355 |
| 19993 | 10.21233/q20r-m406 |
| 22847 | 10.21233/q2tc-z758 |
| 4523  | 10.21233/q36c-4q49 |
| 21545 | 10.21233/q6p2-kw54 |
| 17292 | 10.21233/q744-pp22 |
| 42570 | 10.21233/q95g-2x92 |
| 41421 | 10.21233/q9sk-t894 |
| 45192 | 10.21233/q9wh-hq41 |
| 14104 | 10.21233/qaht-6745 |
| 14935 | 10.21233/qamn-c462 |
| 25400 | 10.21233/qbf7-hn56 |
| 21770 | 10.21233/qbkz-hz40 |
| 32260 | 10.21233/qd2q-5c39 |
| 24553 | 10.21233/qdx7-af11 |
| 4135  | 10.21233/qem1-6q63 |
| 13029 | 10.21233/qf6p-8j75 |

|       |                    |
|-------|--------------------|
| 4209  | 10.21233/qf8f-me80 |
| 22648 | 10.21233/qf8f-wb97 |
| 4470  | 10.21233/qfrx-zf42 |
| 42547 | 10.21233/qg8e-np07 |
| 45173 | 10.21233/qgv1-sv24 |
| 45164 | 10.21233/qh50-8208 |
| 15377 | 10.21233/qhtr-fk23 |
| 41183 | 10.21233/qjda-f561 |
| 4085  | 10.21233/qjjs-h634 |
| 4116  | 10.21233/qjxn-st60 |
| 44723 | 10.21233/qk2b-8b38 |
| 22904 | 10.21233/qka4-j483 |
| 46479 | 10.21233/qkmf-dk52 |
| 41417 | 10.21233/qmke-wg69 |
| 14558 | 10.21233/qmy5-xr61 |
| 4483  | 10.21233/qp8c-4854 |
| 22344 | 10.21233/qphx-cn83 |
| 4197  | 10.21233/qq1x-zk02 |
| 41476 | 10.21233/qqk2-fy61 |
| 15612 | 10.21233/qrjk-gj85 |
| 24100 | 10.21233/qrwc-m362 |
| 22814 | 10.21233/qtf9-zf76 |
| 24300 | 10.21233/qtfz-0018 |
| 41237 | 10.21233/qx7x-1245 |
| 24250 | 10.21233/qx94-hx64 |
| 4330  | 10.21233/qxv2-w585 |
| 40949 | 10.21233/qyrx-tz10 |
| 42685 | 10.21233/qzek-wp34 |
| 24956 | 10.21233/r08t-2829 |
| 15294 | 10.21233/r0cq-9083 |
| 20397 | 10.21233/r0kz-yt78 |
| 20311 | 10.21233/r0mg-q111 |
| 41339 | 10.21233/r11j-mj44 |
| 4058  | 10.21233/r27w-7c93 |
| 4532  | 10.21233/r2nw-6c72 |
| 23019 | 10.21233/r37v-gx98 |
| 24193 | 10.21233/r3mj-5588 |
| 15704 | 10.21233/r4mc-tc72 |
| 25127 | 10.21233/r4xz-v815 |
| 16238 | 10.21233/r5wm-z686 |
| 26516 | 10.21233/r6kr-hg54 |
| 4351  | 10.21233/r749-6141 |
| 25318 | 10.21233/r7dr-q154 |

|       |                     |
|-------|---------------------|
| 22842 | 10.21233/r8zp-ww92  |
| 4102  | 10.21233/r9pn-tx36  |
| 17338 | 10.21233/r9wb-gz24  |
| 22646 | 10.21233/rahy-8590  |
| 4203  | 10.21233/raph-rb39  |
| 41753 | 10.21233/rarx-fe28  |
| 26425 | 10.21233/rb09-6144  |
| 15325 | 10.21233/rb6f-1g25  |
| 15368 | 10.21233/rc8q-je06  |
| 4154  | 10.21233/rce2-en21  |
| 41746 | 10.21233/rd01-0v56  |
| 22757 | 10.21233/rd1y-0x62  |
| 45716 | 10.21233/rfek-5a50  |
| 14650 | 10.21233/rg17-hr80  |
| 42663 | 10.21233/rgr7-f616  |
| 15020 | 10.21233/rgvz-gj38  |
| 42677 | 10.21233/rhm6-pc30  |
| 15009 | 10.21233/rhs1-wt07  |
| 45324 | 10.21233/rj4f-fn81  |
| 13060 | 10.21233/rja4-q512  |
| 4420  | 10.21233/rmkd-2162  |
| 41411 | 10.21233/rmpn-9878  |
| 24931 | 10.21233/rn1j-tb02  |
| 25404 | 10.21233/rn65-2k02  |
| 4490  | 10.21233/rnkp-2723  |
| 15680 | 10.21233/rp2w-0753  |
| 15785 | 10.21233/rp8s-2k53  |
| 41750 | 10.21233/rpzt-3p58  |
| 15909 | 10.21233/rqzm-ma95  |
| 24574 | 10.21233/rrows-7771 |
| 41521 | 10.21233/rrzj-sp79  |
| 24944 | 10.21233/rsdg-ep81  |
| 20042 | 10.21233/rt31-zw12  |
| 45207 | 10.21233/rt3s-g752  |
| 45327 | 10.21233/rtcq-kn47  |
| 22761 | 10.21233/rw25-2v24  |
| 25372 | 10.21233/rwdw-1852  |
| 21418 | 10.21233/rwpj-e158  |
| 24952 | 10.21233/ryar-ev70  |
| 22689 | 10.21233/rybb-mp20  |
| 4134  | 10.21233/ryfa-y280  |
| 45725 | 10.21233/s0pq-6335  |
| 4545  | 10.21233/s1ae-ar89  |

|       |                    |
|-------|--------------------|
| 40627 | 10.21233/s1va-qn28 |
| 3913  | 10.21233/s1x4-mq32 |
| 46485 | 10.21233/s2j6-5w36 |
| 17597 | 10.21233/s3er-nf45 |
| 15284 | 10.21233/s3ma-a925 |
| 18106 | 10.21233/s4jg-yh87 |
| 22119 | 10.21233/s4k3-4429 |
| 14370 | 10.21233/s4yh-p034 |
| 22738 | 10.21233/s54m-1k85 |
| 16073 | 10.21233/s6jx-f115 |
| 42673 | 10.21233/s6my-6052 |
| 45387 | 10.21233/s6wg-4d92 |
| 4288  | 10.21233/s7rb-ap65 |
| 41220 | 10.21233/s7t1-hx33 |
| 24520 | 10.21233/s85f-3f36 |
| 24837 | 10.21233/s8ht-3z18 |
| 4517  | 10.21233/s8kk-y022 |
| 17383 | 10.21233/s9wz-1g21 |
| 25013 | 10.21233/sa5v-5h89 |
| 24102 | 10.21233/sa88-mb64 |
| 14972 | 10.21233/sam2-cd21 |
| 45314 | 10.21233/sb36-c222 |
| 24284 | 10.21233/sbes-jp06 |
| 46462 | 10.21233/sc2f-5d04 |
| 24197 | 10.21233/sc9n-2r53 |
| 24578 | 10.21233/scew-1h82 |
| 45168 | 10.21233/scrs-nq43 |
| 4118  | 10.21233/sczz-2g33 |
| 22763 | 10.21233/sd3z-7v27 |
| 4554  | 10.21233/sdqe-ky81 |
| 3884  | 10.21233/sewp-vp39 |
| 25027 | 10.21233/sf2s-x915 |
| 4543  | 10.21233/sfsk-ej53 |
| 21422 | 10.21233/sg70-ew74 |
| 4150  | 10.21233/shhz-0f61 |
| 4005  | 10.21233/sj04-8c24 |
| 22793 | 10.21233/sjqw-qa18 |
| 15511 | 10.21233/sk02-jh34 |
| 17672 | 10.21233/skp4-td45 |
| 15713 | 10.21233/sn81-zc38 |
| 22753 | 10.21233/snt9-p808 |
| 20293 | 10.21233/snyf-b526 |
| 4030  | 10.21233/sq17-8k63 |

|       |                    |
|-------|--------------------|
| 24110 | 10.21233/sq7c-9a90 |
| 25232 | 10.21233/sqtj-fr11 |
| 15381 | 10.21233/ss13-7n86 |
| 17880 | 10.21233/ssg9-gk36 |
| 40955 | 10.21233/stpw-ta17 |
| 24497 | 10.21233/sxfw-2b43 |
| 24181 | 10.21233/sxhe-sa20 |
| 24227 | 10.21233/sxhx-j135 |
| 22824 | 10.21233/sy1b-py46 |
| 41245 | 10.21233/syjt-3739 |
| 4002  | 10.21233/szbb-8k05 |
| 18159 | 10.21233/t00e-b616 |
| 22342 | 10.21233/t052-s807 |
| 22674 | 10.21233/t0ea-cd42 |
| 4383  | 10.21233/t0t5-0w85 |
| 24108 | 10.21233/t1ba-1q15 |
| 4032  | 10.21233/t1n7-cq82 |
| 45406 | 10.21233/t1p9-n569 |
| 41030 | 10.21233/t2fv-s268 |
| 41453 | 10.21233/t318-2y34 |
| 42712 | 10.21233/t318-n046 |
| 20223 | 10.21233/t3c4-7x23 |
| 45221 | 10.21233/t3tp-6180 |
| 16129 | 10.21233/t4b6-ax18 |
| 24669 | 10.21233/t4ct-mw46 |
| 24493 | 10.21233/t4n0-6s83 |
| 41210 | 10.21233/t55e-8g66 |
| 3973  | 10.21233/t57v-4b19 |
| 45144 | 10.21233/t6dq-4b03 |
| 24753 | 10.21233/t7ne-1h11 |
| 4117  | 10.21233/tab2-ts04 |
| 15462 | 10.21233/tadv-5c57 |
| 24145 | 10.21233/tbav-4v25 |
| 21415 | 10.21233/tbhk-kw62 |
| 3866  | 10.21233/tcav-fn36 |
| 20046 | 10.21233/td9p-m745 |
| 14676 | 10.21233/te1p-he56 |
| 24859 | 10.21233/te66-cy52 |
| 20512 | 10.21233/tegf-sg62 |
| 42745 | 10.21233/tekc-rz82 |
| 17398 | 10.21233/teyv-5z70 |
| 14510 | 10.21233/tfq7-s408 |
| 22955 | 10.21233/tgd4-nk81 |

|       |                    |
|-------|--------------------|
| 3872  | 10.21233/tk7w-th94 |
| 26435 | 10.21233/tktg-sh56 |
| 4518  | 10.21233/tkzz-2t77 |
| 14641 | 10.21233/tmdc-mj73 |
| 1147  | 10.21233/tp4a-h605 |
| 4529  | 10.21233/tphv-z798 |
| 45722 | 10.21233/tpvk-wa79 |
| 24112 | 10.21233/tq8x-5z45 |
| 17328 | 10.21233/tr2m-fm40 |
| 25410 | 10.21233/ts6e-h593 |
| 22938 | 10.21233/tt6f-9c78 |
| 15825 | 10.21233/ttaf-pc16 |
| 22771 | 10.21233/ttjd-w232 |
| 15665 | 10.21233/twkp-hz46 |
| 45204 | 10.21233/tx0m-hk41 |
| 15323 | 10.21233/txns-sv58 |
| 19931 | 10.21233/txpr-cb18 |
| 25131 | 10.21233/tz5g-8d59 |
| 4294  | 10.21233/v088-1d37 |
| 17359 | 10.21233/v0wk-b742 |
| 24048 | 10.21233/v1dw-9x16 |
| 15363 | 10.21233/v2kw-6697 |
| 24061 | 10.21233/v3yx-9c11 |
| 22640 | 10.21233/v4mx-q473 |
| 22662 | 10.21233/v7ky-p784 |
| 17711 | 10.21233/v7nq-4w81 |
| 24343 | 10.21233/v8jm-v785 |
| 1582  | 10.21233/v98s-4073 |
| 4405  | 10.21233/v9em-3b09 |
| 25406 | 10.21233/vbwz-tg22 |
| 41401 | 10.21233/vc1n-v894 |
| 14955 | 10.21233/vcma-8k37 |
| 4533  | 10.21233/vdpe-dp57 |
| 15403 | 10.21233/vds5-pf58 |
| 14803 | 10.21233/ve01-y167 |
| 40990 | 10.21233/ve15-mn82 |
| 24279 | 10.21233/veqa-0n52 |
| 14619 | 10.21233/vf6b-8k35 |
| 16016 | 10.21233/vffp-x175 |
| 41460 | 10.21233/vg3e-tx36 |
| 41485 | 10.21233/vgxh-qv84 |
| 4207  | 10.21233/vh8n-2090 |
| 22664 | 10.21233/vhkm-se51 |

|       |                    |
|-------|--------------------|
| 4468  | 10.21233/vhxz-9969 |
| 24032 | 10.21233/vj9n-bt57 |
| 22960 | 10.21233/vjdb-ec95 |
| 22845 | 10.21233/vkd7-vh44 |
| 22652 | 10.21233/vmeh-gz58 |
| 15766 | 10.21233/vmwe-g130 |
| 15276 | 10.21233/vmxy-3004 |
| 22745 | 10.21233/vn5f-tz80 |
| 4200  | 10.21233/vpnw-pv89 |
| 24410 | 10.21233/vq9d-x874 |
| 45410 | 10.21233/vqfq-2n70 |
| 16054 | 10.21233/vqnc-sx41 |
| 4020  | 10.21233/vqqw-nc29 |
| 15633 | 10.21233/vr5d-4130 |
| 1782  | 10.21233/vrv9-4t45 |
| 45115 | 10.21233/vs9g-8428 |
| 41770 | 10.21233/vsfm-xz32 |
| 24902 | 10.21233/vtmh-9d28 |
| 15882 | 10.21233/vx1h-dj04 |
| 4056  | 10.21233/vxzv-9k94 |
| 4452  | 10.21233/vy6k-x487 |
| 15022 | 10.21233/w03f-sr85 |
| 14498 | 10.21233/w0ab-4w11 |
| 42671 | 10.21233/w0c2-k512 |
| 45719 | 10.21233/w0j3-9h31 |
| 17296 | 10.21233/w2gd-mz79 |
| 43295 | 10.21233/w4n6-qv07 |
| 3999  | 10.21233/w4z8-3q21 |
| 14564 | 10.21233/w4zt-yj57 |
| 25308 | 10.21233/w5qv-sv92 |
| 15214 | 10.21233/w5rw-qd24 |
| 25157 | 10.21233/w61s-9827 |
| 4069  | 10.21233/w63t-nf61 |
| 3896  | 10.21233/w6j3-gn15 |
| 17324 | 10.21233/w72d-bx06 |
| 41469 | 10.21233/w7bt-xr68 |
| 45194 | 10.21233/w88p-xj69 |
| 41532 | 10.21233/w9z1-fn16 |
| 19933 | 10.21233/watr-af89 |
| 24637 | 10.21233/wb8q-wk43 |
| 4476  | 10.21233/wbfp-6424 |
| 22638 | 10.21233/wc9m-v912 |
| 41233 | 10.21233/wefk-sp33 |

|       |                    |
|-------|--------------------|
| 4097  | 10.21233/weqb-ef25 |
| 4380  | 10.21233/whjz-0k24 |
| 45710 | 10.21233/wjmk-7376 |
| 4510  | 10.21233/wkz1-sd64 |
| 41323 | 10.21233/wm29-be77 |
| 15103 | 10.21233/wn4z-7521 |
| 26510 | 10.21233/wnfe-f385 |
| 41587 | 10.21233/wp2z-kt38 |
| 17320 | 10.21233/wq2v-5053 |
| 3882  | 10.21233/wq2x-c027 |
| 26520 | 10.21233/wqej-0r45 |
| 14897 | 10.21233/wrb3-qd23 |
| 14959 | 10.21233/wrt5-qc27 |
| 45389 | 10.21233/ws4c-an72 |
| 22962 | 10.21233/wvsb-6130 |
| 21796 | 10.21233/wwa4-0236 |
| 13073 | 10.21233/wwc5-6x04 |
| 4466  | 10.21233/wwj8-s239 |
| 25382 | 10.21233/wxyd-q154 |
| 16181 | 10.21233/wy62-rm78 |
| 15385 | 10.21233/wy8b-3e83 |
| 3934  | 10.21233/wyaq-1b97 |
| 25003 | 10.21233/x0ba-j040 |
| 15594 | 10.21233/x0c3-ed21 |
| 41228 | 10.21233/x0cd-0q06 |
| 17404 | 10.21233/x0jy-tp30 |
| 24259 | 10.21233/x0z2-py02 |
| 4304  | 10.21233/x11h-5275 |
| 4059  | 10.21233/x17y-bb18 |
| 21706 | 10.21233/x19k-0e45 |
| 15878 | 10.21233/x1bk-ra92 |
| 3894  | 10.21233/x1s2-s723 |
| 15138 | 10.21233/x1ts-qh05 |
| 18110 | 10.21233/x2md-aj39 |
| 4024  | 10.21233/x2v2-4v32 |
| 14110 | 10.21233/x34r-6x54 |
| 14633 | 10.21233/x35d-q248 |
| 4041  | 10.21233/x43j-z193 |
| 4083  | 10.21233/x49t-wj37 |
| 42655 | 10.21233/x4x4-tg29 |
| 3986  | 10.21233/x4xa-1k90 |
| 24593 | 10.21233/x6et-gw35 |
| 26442 | 10.21233/x6sj-rv93 |

|       |                    |
|-------|--------------------|
| 24463 | 10.21233/x7a5-2c36 |
| 45816 | 10.21233/x7et-qe66 |
| 15719 | 10.21233/x7hq-ts05 |
| 41758 | 10.21233/x8p5-xp81 |
| 19820 | 10.21233/x8y7-re14 |
| 24927 | 10.21233/x90a-8v66 |
| 41171 | 10.21233/x91r-1a30 |
| 4145  | 10.21233/x9b0-z153 |
| 24616 | 10.21233/x9jq-my02 |
| 4332  | 10.21233/xa3s-kj49 |
| 40914 | 10.21233/xa6z-jh17 |
| 24639 | 10.21233/xadk-1x55 |
| 24941 | 10.21233/xb5c-wb44 |
| 14512 | 10.21233/xc0y-6b19 |
| 4314  | 10.21233/xe1b-tf19 |
| 32262 | 10.21233/xe3h-wb42 |
| 22953 | 10.21233/xeev-fr63 |
| 41203 | 10.21233/xeke-2h87 |
| 41506 | 10.21233/xett-n046 |
| 41911 | 10.21233/xfh1-6085 |
| 41582 | 10.21233/xfrs-q084 |
| 4391  | 10.21233/xj85-7c26 |
| 22801 | 10.21233/xm08-vp32 |
| 26439 | 10.21233/xmbg-mz72 |
| 41269 | 10.21233/xn7x-eb17 |
| 3870  | 10.21233/xnjz-z143 |
| 21702 | 10.21233/xp8e-bd49 |
| 40844 | 10.21233/xpy2-m222 |
| 4042  | 10.21233/xq55-z804 |
| 15904 | 10.21233/xqhj-c782 |
| 22791 | 10.21233/xraa-re03 |
| 17417 | 10.21233/xrzb-zq82 |
| 22691 | 10.21233/xsdn-cx54 |
| 41479 | 10.21233/xsk9-bx90 |
| 24964 | 10.21233/xss2-e959 |
| 15406 | 10.21233/xstm-aq61 |
| 24572 | 10.21233/xsrx-ky48 |
| 4004  | 10.21233/xw05-mj88 |
| 25402 | 10.21233/xw8c-gq46 |
| 3937  | 10.21233/xwhx-v671 |
| 3874  | 10.21233/xwk9-q426 |
| 15244 | 10.21233/xyf7-9v15 |
| 14491 | 10.21233/xyvh-px20 |

|       |                    |
|-------|--------------------|
| 22736 | 10.21233/xyxq-gr38 |
| 15950 | 10.21233/xz5z-pr53 |
| 3928  | 10.21233/y0cr-gc25 |
| 20308 | 10.21233/y0pj-8d71 |
| 22352 | 10.21233/y1ej-xh18 |
| 24563 | 10.21233/y1f4-bz49 |
| 14125 | 10.21233/y28m-nq05 |
| 18051 | 10.21233/y3mq-m120 |
| 24106 | 10.21233/y42f-6218 |
| 3878  | 10.21233/y4e7-me97 |
| 16186 | 10.21233/y4mj-v434 |
| 44951 | 10.21233/y4ss-7811 |
| 41276 | 10.21233/y554-yd92 |
| 25835 | 10.21233/y5bx-3n98 |
| 22238 | 10.21233/y6je-9a17 |
| 4189  | 10.21233/y7b7-5a72 |
| 24759 | 10.21233/ya3m-xh05 |
| 24057 | 10.21233/ya53-0561 |
| 22346 | 10.21233/yb97-px46 |
| 24238 | 10.21233/ycfn-p887 |
| 14289 | 10.21233/yczc-8b58 |
| 4541  | 10.21233/yd8b-wb47 |
| 14925 | 10.21233/ydnc-0495 |
| 4249  | 10.21233/ye9x-z889 |
| 4539  | 10.21233/yeg0-6p54 |
| 24852 | 10.21233/yfcd-n026 |
| 25083 | 10.21233/yfwj-f753 |
| 40569 | 10.21233/ygbz-tf05 |
| 15939 | 10.21233/yhre-qg42 |
| 4187  | 10.21233/yj5d-ej18 |
| 24954 | 10.21233/yjbz-h684 |
| 15209 | 10.21233/yjhg-b425 |
| 41397 | 10.21233/yktz-5q37 |
| 14944 | 10.21233/ym56-bk43 |
| 21915 | 10.21233/ymye-gn96 |
| 41218 | 10.21233/yp3p-5z78 |
| 22931 | 10.21233/yp88-eq30 |
| 24166 | 10.21233/yr7f-7517 |
| 41562 | 10.21233/ysrz-ve64 |
| 15223 | 10.21233/yt10-kv93 |
| 24491 | 10.21233/ytdh-rq41 |
| 24358 | 10.21233/yvzf-7m50 |
| 15205 | 10.21233/yw2g-1t26 |

|       |                    |
|-------|--------------------|
| 16175 | 10.21233/ywa8-4h38 |
| 15976 | 10.21233/ywkn-vk84 |
| 41580 | 10.21233/ywn4-f081 |
| 21772 | 10.21233/yxa5-7p09 |
| 14291 | 10.21233/yxsc-gf06 |
| 41121 | 10.21233/yxxp-as21 |
| 45707 | 10.21233/yxzd-xn66 |
| 22812 | 10.21233/yy4y-0p72 |
| 4340  | 10.21233/yys3-qz47 |
| 14792 | 10.21233/yzwy-0p89 |
| 17945 | 10.21233/yzzz-aa38 |
| 17377 | 10.21233/z08c-rb24 |
| 21766 | 10.21233/z256-fh92 |
| 15197 | 10.21233/z377-nz81 |
| 24611 | 10.21233/z3vf-sk02 |
| 17385 | 10.21233/z5j4-8v57 |
| 17366 | 10.21233/z627-yk93 |
| 41159 | 10.21233/z7gy-mw75 |
| 15247 | 10.21233/z7yn-c813 |
| 4323  | 10.21233/z80c-sf19 |
| 17347 | 10.21233/z81b-ch22 |
| 25289 | 10.21233/z8a8-vz94 |
| 4272  | 10.21233/z913-g676 |
| 3887  | 10.21233/z9wq-cc18 |
| 24030 | 10.21233/za1e-fb06 |
| 15730 | 10.21233/zakg-m595 |
| 20287 | 10.21233/zc0w-ge65 |
| 14539 | 10.21233/zcrn-2h47 |
| 4497  | 10.21233/zcst-x145 |
| 15660 | 10.21233/zd0z-ve57 |
| 24854 | 10.21233/zd47-af67 |
| 14941 | 10.21233/zdh7-r634 |
| 45398 | 10.21233/zdqt-kr34 |
| 41926 | 10.21233/zdyp-3t68 |
| 15796 | 10.21233/ze2y-2e90 |
| 15715 | 10.21233/zedd-cm35 |
| 2028  | 10.21233/zesr-6507 |
| 4309  | 10.21233/zf76-3490 |
| 16079 | 10.21233/zh76-mx93 |
| 14799 | 10.21233/zhp9-cm48 |
| 4359  | 10.21233/zhsh-zr85 |
| 14629 | 10.21233/zjqh-j697 |
| 22831 | 10.21233/zjr5-v667 |

|       |                    |
|-------|--------------------|
| 4374  | 10.21233/zjtz-k726 |
| 20165 | 10.21233/zk15-wq18 |
| 40791 | 10.21233/zkeb-rj50 |
| 15933 | 10.21233/zkg7-4840 |
| 4505  | 10.21233/zkna-r256 |
| 15902 | 10.21233/zn7m-gc31 |
| 12    | 10.21233/znex-sp94 |
| 15682 | 10.21233/zpe5-s053 |
| 40168 | 10.21233/zq7z-7471 |
| 24078 | 10.21233/zqez-kr13 |
| 41335 | 10.21233/zqj0-ma56 |
| 24149 | 10.21233/zqk8-aa65 |
| 4372  | 10.21233/zqse-ep64 |
| 4507  | 10.21233/zr55-9j43 |
| 42714 | 10.21233/zspv-ta39 |
| 24243 | 10.21233/zvcd-yn53 |
| 13053 | 10.21233/zvn7-m788 |
| 24302 | 10.21233/zw4f-ce58 |
| 13071 | 10.21233/zw81-nc35 |
| 20372 | 10.21233/zwdj-4e50 |
| 4404  | 10.21233/zwpy-vk55 |
| 4498  | 10.21233/zx8x-vj28 |
| 4050  | 10.21233/zxz5-q261 |
