# Supplementary material for: LegacyVegetation 1.0: Global reconstruction of vegetation composition and forest cover from pollen archives of the last 50 ka
Source: Copernicus journal article supplement (doi:10.5194/essd-2023-486), 2024-04-02
Supplement: Supplementary file [file essd-2023-486-AC4-supplement.pdf]

# Reply to Giesecke

Laura Schild and Ulrike Herzschuh

## General reply

Dear Thomas Giesecke,

Thank you for your careful review of our manuscript. While you welcome our effort to conduct a global pollen-based vegetation reconstruction you raise some concerns. We are confident that these can be resolved quickly and easily and will ultimately underline the validity and usability of our reconstruction.

We addressed connectivity of published data to original Neotoma records by adding citations and DOIs and we are keen to add revised chronologies and taxonomic harmonizations to existing Neotoma records. We acknowledge that manuscripts such as ours would not be possible without the considerable effort toward the Neotoma Paleoecological Database and include this in our acknowledgments. Added clarification of how we envision the data set to be used is indeed needed and we will expand on this in the manuscript and provide an additional R script for dynamic rasterization. We agree with the high uncertainty connected to the reconstructions in the Southern Hemisphere and have decided to omit these reconstructions from our data set. Additionally, we will change the name of our calculated source area and will include only reconstructed forest cover in our data set connected to the optimized reconstruction.

We are certain that these adjustments are feasible and have already been able to implement several of them. In our detailed response below, we have addressed your general and specific comments in more detail.

Best regards

Laura Schild and Ulrike Herzschuh

## Detailed replies

### General comments

#### Original comment

Before looking more closely at the manuscript I like to extend on the comment by Williams et al. of developing the underlying Legacy Pollen Dataset. Branching of a large dataset from Neotoma

into the Legacy Pollen Dataset with vetting and adding metadata, results in the additional work not being linked back to Neotoma. In the spirit of open science it would be better practice to contribute to Neotoma by uploading additional datasets and correcting or adding metadata. Look up tables for taxonomic harmonization or new chronologies could then be linked to the data in Neotoma. Republishing Neotoma derived data makes scientists using that data ignore the original data source. This also means that Neotoma loses recognition for the work of the data stewards and support for acquiring funding to maintain and develop the database.

## Reply

We have added citations to Neotoma and constituent data bases and revised our acknowledgements. Additionally we provide a list of Neotoma records included in the LegacyPollen2.0 data set and their DOIs (see attached at the end of this reply). We are also open to expanding Neotoma's records by adding revised chronologies and taxonomic harmonizations, but would require assistance from the Neotoma team to train one of our team members.

### Revised text at line 76:

The pollen data synthesis LegacyPollen2.0 (Li et al., 2024b) includes 3728 temporally resolved records (time-series) distributed globally. Data were collected from individual publications and the Neotoma Paleoeology Database which includes data from the European Pollen Database, the QUAVIDA data base for Australasia, the Latin American Pollen Database, the African Pollen Database and the North American Pollen database (Flantua et al., 2015; Fyfe et al., 2009; Giesecke et al., 2014; Lézine et al., 2021; Rowe et al., 2007; Whitmore et al., 2005; Williams et al., 2018). An overview of Neotoma records included in LegacyPollen 2.0 can be found in Table S2.

Flantua, S.G.A., Hooghiemstra, H., Grimm, E.C., Behling, H., Bush, M.B., González-Arango, C., Gosling, W.D., Ledru, M.-P., Lozano-García, S., Maldonado, A., Prieto, A.R., Rull, V., Van Boxel, J.H., 2015. Updated site compilation of the Latin American Pollen Database. *Rev. Palaeobot. Palynol.* 223, 104–115. <https://doi.org/10.1016/j.revpalbo.2015.09.008>

Fyfe, R.M., de Beaulieu, J.-L., Binney, H., Bradshaw, R.H.W., Brewer, S., Le Flao, A., Finsinger, W., Gaillard, M.-J., Giesecke, T., Gil-Romera, G., Grimm, E.C., Huntley, B., Kunes, P., Köhl, N., Leydet, M., Lotter, A.F., Tarasov, P.E., Tonkov, S., 2009. The European Pollen Database: past efforts and current activities. *Veg. Hist. Archaeobotany* 18, 417–424. <https://doi.org/10.1007/s00334-009-0215-9>

Giesecke, T., Davis, B., Brewer, S., Finsinger, W., Wolters, S., Blaauw, M., de Beaulieu, J.-L., Binney, H., Fyfe, R.M., Gaillard, M.-J., Gil-Romera, G., van der Knaap, W.O., Kuneš, P., Köhl, N., van Leeuwen, J.F.N., Leydet, M., Lotter, A.F., Ortu, E., Semmler, M., Bradshaw, R.H.W., 2014. Towards mapping the late Quaternary vegetation change of Europe. *Veg. Hist. Archaeobotany* 23, 75–86. <https://doi.org/10.1007/s00334-012-0390-y>

Lézine, A.-M., Ivory, S.J., Gosling, W.D., Scott, L., 2021. The African Pollen Database (APD) and tracing environmental change: State of the Art, in: *Quaternary Vegetation Dynamics*. CRC Press.

Rowe, C., Fraser, R., Harrison, S., Dodson, J., 2007. The QUAVIDA synergy: quaternary fire, vegetation and climate change in Australasia. *Quat. Int.* 167–168, 355–355.

<https://doi.org/10.1016/j.quaint.2007.04.001>

Whitmore, J., Gajewski, K., Sawada, M., Williams, J.W., Shuman, B., Bartlein, P.J., Minckley, T., Viau, A.E., Webb, T., Shafer, S., Anderson, P., Brubaker, L., 2005. Modern pollen data from North America and Greenland for multi-scale paleoenvironmental applications. *Quat. Sci. Rev.* 24, 1828–1848.

<https://doi.org/10.1016/j.quascirev.2005.03.005>

Williams, J.W., Grimm, E.C., Blois, J.L., Charles, D.F., Davis, E.B., Goring, S.J., Graham, R.W., Smith, A.J., Anderson, M., Arroyo-Cabrales, J., Ashworth, A.C., Betancourt, J.L., Bills, B.W., Booth, R.K., Buckland, P.I., Curry, B.B., Giesecke, T., Jackson, S.T., Latorre, C., Nichols, J., Purdum, T., Roth, R.E., Stryker, M., Takahara, H., 2018. The Neotoma Paleoecology Database, a multiproxy, international, community-curated data resource. *Quat. Res.* 89, 156–177. <https://doi.org/10.1017/qua.2017.105>

## Original comment

Regarding the here presented manuscript by Schild et al. I see several problems and directions of how to address them. I generally agree with the comments by Marie-Jose Gaillard and Michela Mariani regarding technical shortcomings, definition of the source area of pollen (NOT “relevant source area”) and the recommendation to restrict a REVEALS application to the northern hemisphere. If attempting to include the southern hemisphere the authors should reduce the unrealistic assumptions as some more information could be gained. Fall speeds could be estimated using the size of pollen grains and initial guesses of RPPEs could have been made by inviting experts working on the different continents and including recent publications on RPPEs.

## Reply

We will adjust our terminology to refer to the parameter calculated by us as the “80% pollen source area.” This term describes the area from which the median relative influx of all taxa reaches 80%. This calculation uses the lake deposition model described in Theuerkauf et al.'s REVEALSinR. Initially, pollen deposition is calculated per taxon from  $z_{max}$ , representing the maximum depth. While this assumes that each taxon deposits all its pollen, it simplifies the reality where pollen can originate from farther distances, and fluvial inputs into lakes are inevitable. Nonetheless, this assumption aligns with REVEALS. Through a stepwise process, the radius around the basin is incrementally expanded, and the relative influx of deposited pollen for each taxon is calculated relative to the total influx at  $z_{max}$ . We define our 80% pollen source radius as the radius at which the median relative influx of all taxa reaches 80%. This calculation primarily serves to provide a sense of the source area's scale to users unfamiliar with pollen data. It underscores the regional nature of lacustrine pollen data and illustrates how lake size influences this source area. We will include this detailed explanation in the manuscript.

We agree that uncertainties in Southern Hemispheric reconstructions are considerable due to limited regional RPP values and have decided to exclude them from our dataset.

We thank you for the suggestion to calculate missing fall speed values. We will implement this for taxa with known pollen grain sizes in the Northern Hemisphere, where other fall speed values are not available.

## Original comment

My concerns are particularly related to the aim of the authors to publish the data resulting from the analysis. REVEALS results not only provide information on past woodland cover, but also on bias reduced abundance of the major plant genera or families. Given the way the authors used RPPEs and fall speeds for the southern hemisphere such estimates are unlikely to improve the bias in pollen percentage data. However, they may invite researchers not understanding the limitations to misuse such data. This is particularly the case where the authors adjusted RPPEs to obtain an overall better fit with modern tree cover globally. Here the authors admit that the adjusted RPPEs are ecologically meaningless, and I therefore urge the authors not to publish the resulting vegetation reconstructions as they will also be meaningless. If the authors are convinced that the resulting tree cover is meaningful, they could restrict the data publication to that.

## Reply

We consider the optimized RPP and the related reconstruction not as the most relevant outcome from this manuscript but rather an addition to the reconstruction using a synthesis of published RPP. Therefore, we will remove taxonomic reconstructions and only include forest cover for the optimized RPP data set and move optimized RPP from the manuscript body to the appendix. In the reconstruction using synthesized RPP values, we will highlight which taxa had RPP available and which used standardized RPP values.

As stated above, we intend to remove the Southern Hemisphere from the data set as we agree with the notable uncertainties.

## Original comment

If a data publication is pursued, the authors should explain in which way they envision the data to be used. Is the attempt to estimate the source area of 80% of pollen to then relate the information on tree cover to that area, and if so how shall that be implemented? Also, how will overlapping areas be treated? Even on the northern hemisphere the gained information is not continuous and I therefore wonder how the results will be used in climate modelling. Moreover, I did not find anything in the manuscript of how the obtained data informs on the position of northern or southern forest or tree limits, that are difficult to estimate from percentage pollen data.

## Reply

We mainly include the calculation of the 80% source area to give an idea of the scale of source area to users not familiar with pollen data. This emphasizes the regional scale of pollen data from large basins, when reconstructions are used at site-level.

Site-wise reconstructions using large lakes are valid alone and their information can be used in gridded versions of this data set as well. We recognize that reconstructions from small lakes and peatland sites should not be used alone as site-wise reconstructions. Our aim is for the data set to be used flexibly, meaning that users can set their own temporal and spatial resolution for rasterization. This is why we did not prepare a set rasterization. To highlight this use case we will provide a script to rasterize the dataset dynamically and classify grid cell reliability by record availability (<https://github.com/lauraschild/rasterization/tree/main>). Additionally, we will expand on this in our data usability section and clarify how we intend the data set to be used reliably. Small sites and peatland will also receive an additional flag in the data set as “unfit to be used on site-level” .

Even though using REVEALS improves the reconstruction of vegetation compared to pollen data, we will highlight the difficulty of detecting tree lines with compositional data in our manuscript.

## Original comment

Retaining all the current aspects of the manuscript I would recommend to revise the manuscript and publish it in a disciplinary journal to discuss aspects of this analysis which yield new insights. If continuing with the modern comparison I would suggest to use available surface sample data or core tops marked as modern. Using top samples as old as 500 years in the comparison with modern woodland cover introduces a huge bias.

## Reply

Thank you for your suggestion. We do believe that it is more useful to validate with the data set instead of using independent surface samples. We agree that 500 years constitute a large age bin, we decided to use this in order to include as many records as possible. We are happy to include a validation using a smaller age bin in the manuscript. You can find a comparison of validations using the different age bins in the figures below. Using smaller bins changes mean absolute errors only marginally.

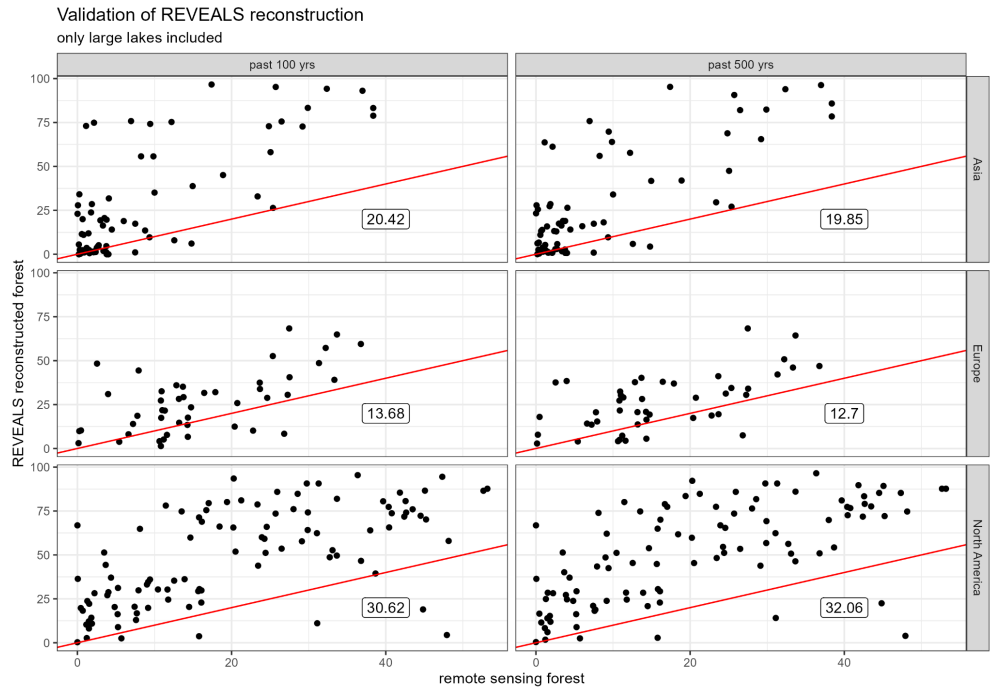

Fig 1: Site-wise validation of REVEALS reconstructed forest cover using only large lakes for two different age bins as modern forest cover.

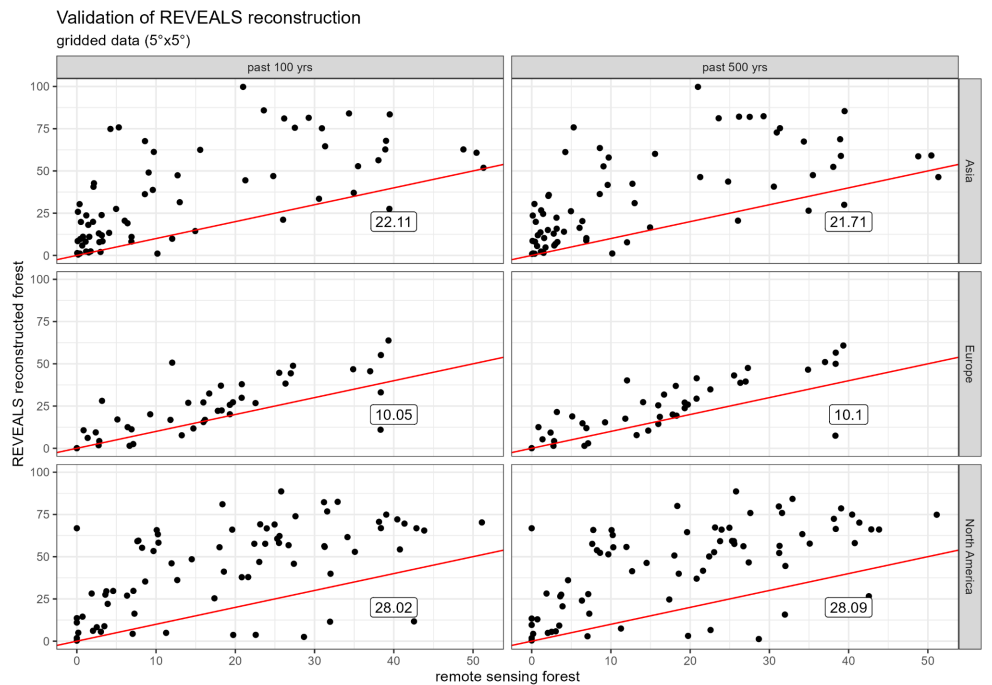

Fig 2: Grid-cell based validation of REVEALS reconstructed forest based on aggregated grid cell values for two different age bins as modern forest cover. Errors are smaller compared to site-wise validations (Fig 1) with the exception of Asia. The smaller age bin has virtually no effect on MAE.

## Original comment

In summary, I don't recommend the publication of the data from the current analysis and suggest restricting the analysis to the northern hemisphere with a publication of the findings in a topical journal.

## Reply

The reviewers and commenters unanimously express interest in our dataset and acknowledge its potential usefulness. They also recognize the inherent challenges and uncertainties. A data publication allows for the thorough exploration and discussion of these limitations. This accurate documentation is especially necessary in the context of a PhD thesis. Publishing in a topical journal would be counterproductive as it might not allow the space or focus needed for comprehensive discussion of the data. The data have also significantly been altered compared to the original pollen data which justifies the new dataset.

## Detailed comments

17: The uncertainties introduced here will not make the results invaluable for the investigation of past vegetation dynamics.

We'll rephrase this statement. But we do believe that usefulness is a given as we exclude the Southern Hemisphere and show a clear improvement of forest cover reconstructions compared to Pollen data in our validations.

28: The study is on vegetation cover not climate.

We will clarify that we are not providing past climate data.

34: Fyfe et al. 2009 is not in the reference list.

We added Fyfe et al. 2009 to the reference list and cite it at line 76 (revised).

The pollen data synthesis LegacyPollen2.0 (Li et al., 2024b) includes 3728 temporally resolved records (time-series) distributed globally. Data were collected from individual publications and the Neotoma Paleoecology Database which includes data from the European Pollen Database, the QUAVIDA data base for Australasia, the Latin American Pollen Database, the African Pollen Database and the North American Pollen database (Flantua et al., 2015; Fyfe et al., 2009; Giesecke et al., 2014; Lézine et al., 2021; Rowe et al., 2007; Whitmore et al., 2005; Williams et al., 2018). An overview of Neotoma records included in LegacyPollen 2.0 can be found in Table S2.

36-38: This is not allowing for a broader but a more restricted application of pollen data as some aspects may not be possible to investigate with a reduced taxonomic depth. Please reword.

We will reword this section to highlight the improved comparability as a trade-off with taxonomic depth.

49: “relevant” pollen source area is well defined, but this is not meant here.

As described above we will change this to be named “80% pollen source area”.

50: Nielsen and Odgaard 2010 are a good example of applying the full Landscape Reconstruction Algorithm with a focus on LOVE not so much REVEALS.

We will remove Nielsen and Odgaard from the citations here.

51: “ability” rather than “accuracy”

We will change “ability” to “accuracy”.

105: No information is given where the RPPEs are coming from for the southern hemisphere if they are not set to 1 and not used from the northern Hemisphere. Please provide references.

We have decided to omit reconstructions for the Southern Hemisphere from the data set.

106: Fall speeds can be easily estimated based on the size of pollen grains.

Thank you for this suggestion. We will calculate missing fall speed for Northern Hemispheric taxa when grain size data is available.

111: Not “relevant source area”

We changed the name of this value to “80% pollen source area”.

118: How was that latitudinal limit used or derived for the past?

It is constant in time.

120: In most situations the forest cover has changed dramatically over the last 500 years. Why did you not use surface sample datasets for this exercise or sites with the top sample marked as modern?

We reduced the size of the age bin for validation to the past 100 years as illustrated in Fig. 1 and 2 above.

168: Chenopodiaceae are an old classification and now included in Amaranthaceae. Why do they have such different RPPEs in Europe?



Chenopodiaceae are included in Amaranthaceae in our input data. They have the same RPP in Europe. The next RPP in this sentence refers to Australia and Oceania (now void). Rephrasing of this sentence will hopefully resolve this confusion.

189: Particularly in the southern hemisphere one would expect that the adjustments lead to improvements. It would be interesting to explore the reasons why that is not the case e.g. the low pollen productivity of many tropical trees. I cannot see that low data availability is a reason here.

We decided to exclude reconstructions from the Southern Hemisphere in our data set.

195: Starting with initial values different from 1 may also be a way to explore this further.

Thank you for this interesting idea. We will try this and include results in the manuscript.

201: It would be interesting to look at these trends for different continents. If a first approximation of forest cover could be made by adjusting arboreal pollen percentages on a continental scale that could be used by modelers as a first order estimate. Again such comparisons should better be done using the modern analogue approach.

We can also supply this trend on a continental scale. That this could provide a rough estimate of potential error and its direction is true and could indeed be useful for modelers. We agree that the modern analogue technique is also a valid reconstruction method for past vegetation. However, REVEALS has been used for several large-scale and continental scale reconstructions in the past, which is why we think it is valid as well (see for example Githumbi et al. 2021, Dawson et al. 2024, Serge et al. 2023).

Dawson, Andria, John W. Williams, Marie-José Gaillard, Simon J. Goring, Behnaz Pirzamanbein, Johan Lindstrom, R. Scott Anderson, u. a. „Holocene Land Cover Change in North America: Continental Trends, Regional Drivers, and Implications for Vegetation-Atmosphere Feedbacks“. *Climate of the Past Discussions*, 20. Februar 2024, 1–52. <https://doi.org/10.5194/cp-2024-6>.

Githumbi, Esther, Ralph Fyfe, Marie-Jose Gaillard, Anna-Kari Trondman, Florence Mazier, Anne-Birgitte Nielsen, Anneli Poska, u. a. „European Pollen-Based REVEALS Land-Cover Reconstructions for the Holocene: Methodology, Mapping and Potentials“. *Earth System Science Data* 14, Nr. 4 (8. April 2022): 1581–1619. <https://doi.org/10.5194/essd-14-1581-2022>.

Serge, M. A., F. Mazier, R. Fyfe, M.-J. Gaillard, T. Klein, A. Lagnoux, D. Galop, u. a. „Testing the Effect of Relative Pollen Productivity on the REVEALS Model: A Validated Reconstruction of Europe-Wide Holocene Vegetation“. *Land* 12, Nr. 5 (Mai 2023): 986. <https://doi.org/10.3390/land12050986>.

289-296: I strongly disagree with these statements. Particularly regarding the northern and southern tree limits the manuscript is not demonstrating how their detection has improved.

We will relativize these statements. However, the validations show a clear improvement of forest cover reconstruction compared to pollen data which, at the very least, now constitutes a **better** reconstruction product. Due to the potentially high temporal and spatial variability of pollen data we cannot (and may not ever) be able to reconstruct true past vegetation (something that a modern analogue is also not able to do). Still we see that we reconstruct modern vegetation better than before.

Data: I looked at the resulting data for a few sites in northern Patagonia where I am familiar with the vegetation. First of all I could not find where the RPPE for *Nothofagus* comes from. For a site in the steppe (Lago Mosquito) with *Austrocedrus* on its western shore, REVEALS estimated Holocene values around 60 % forest cover, which is too high. The adjusted run did indeed lower the forest cover to between 40 and 20 %. However, this reconstruction returned the lowest forest cover for the time that *Austrocedrus* woodlands were present on its western shore and tree cover was highest. This may be due to the fact that Cupressaceae was not part of the taxa used for optimization. Thus, while the amount of forest cover is more realistic in the adjusted run the reconstructed Holocene trend is the reverse of what was interpreted by the authors of the site based data. Moreover, the only tree growing abundantly near the site for the last 3000 years is not part of the reconstructed vegetation in the adjusted run. This is of course just a single example, but it does illustrate my earlier points.

We have decided to omit reconstructions from the Southern Hemisphere from our data set.

Table S2: List of all Neotoma records included in LegacyPollen 2.0.

| Dataset_ID | doi                |
|------------|--------------------|
| 4363       | 10.21233/00jj-rn55 |
| 22711      | 10.21233/00kz-c576 |
| 20060      | 10.21233/012s-c321 |
| 3923       | 10.21233/01cq-0v25 |
| 19784      | 10.21233/01fk-3b13 |
| 4551       | 10.21233/0471-wz80 |
| 4427       | 10.21233/04mx-dx20 |
| 19814      | 10.21233/04w0-7r18 |
| 3931       | 10.21233/054g-vs09 |
| 20012      | 10.21233/057s-wr75 |
| 26572      | 10.21233/05v5-d378 |
| 45223      | 10.21233/064r-zv51 |
| 48624      | 10.21233/0672-4W61 |
| 47864      | 10.21233/06YB-XK91 |
| 41514      | 10.21233/07ah-4r18 |
| 24330      | 10.21233/0875-yw50 |
| 4062       | 10.21233/08cj-ht50 |
| 46603      | 10.21233/0A8S-FT20 |
| 26518      | 10.21233/0ajk-6m86 |
| 24867      | 10.21233/0ax2-vj66 |
| 4053       | 10.21233/0bx3-kt48 |
| 16264      | 10.21233/0c9y-af32 |
| 45642      | 10.21233/0d1q-p773 |
| 25481      | 10.21233/0dqt-e594 |
| 17947      | 10.21233/0dt6-3493 |
| 40963      | 10.21233/0e66-gt09 |
| 40579      | 10.21233/0ebh-jc93 |
| 41602      | 10.21233/0ew2-sj35 |
| 24386      | 10.21233/0f9n-x142 |
| 24635      | 10.21233/0gh3-dt80 |
| 15211      | 10.21233/0hkg-af34 |
| 24376      | 10.21233/0jfa-j049 |
| 17354      | 10.21233/0jx5-7t71 |
| 20029      | 10.21233/0kgn-j437 |
| 15132      | 10.21233/0kpg-kx30 |
| 22672      | 10.21233/0kqz-j553 |
| 22820      | 10.21233/0kw2-2170 |
| 40572      | 10.21233/0m9v-mq69 |
| 4378       | 10.21233/0mn2-9w85 |
| 14177      | 10.21233/0mss-km04 |
| 15967      | 10.21233/0n3x-5g88 |
| 22817      | 10.21233/0nty-tb40 |
| 16222      | 10.21233/0pre-hx18 |
| 41205      | 10.21233/0rb3-az79 |
| 15207      | 10.21233/0rm4-f986 |
| 46447      | 10.21233/0vhe-5b77 |
| 41448      | 10.21233/0vty-vb30 |
| 21812      | 10.21233/0w0p-my34 |
| 42417      | 10.21233/0wn3-0048 |
| 15732      | 10.21233/0wvv-hb57 |
| 3969       | 10.21233/0xa7-w271 |
| 25427      | 10.21233/0xht-hx92 |
| 24673      | 10.21233/0xky-3a80 |
| 19846      | 10.21233/0xmq-rz62 |
| 22049      | 10.21233/0yan-yj67 |
| 15309      | 10.21233/0ywb-hk24 |
| 16193      | 10.21233/0yz5-ad05 |
| 19937      | 10.21233/0zcx-jb34 |
| 45347      | 10.21233/0zgh-6r09 |
| 24207      | 10.21233/0zqa-9w57 |
| 46512      | 10.21233/102F-CT44 |
| 15586      | 10.21233/108x-ge80 |
| 25843      | 10.21233/10kw-5k34 |
| 19995      | 10.21233/11hj-eq70 |
| 41606      | 10.21233/11ph-mc56 |
| 24164      | 10.21233/13fe-7b21 |
| 3985       | 10.21233/140w-er94 |
| 10981      | 10.21233/149e-e689 |
| 25786      | 10.21233/14rr-c071 |
| 21577      | 10.21233/1627-0v53 |
| 41027      | 10.21233/16gz-mt48 |
| 25408      | 10.21233/17jd-z330 |
| 19323      | 10.21233/17ta-5252 |
| 24542      | 10.21233/19wm-rd42 |
| 42539      | 10.21233/1BDV-YC11 |
| 47669      | 10.21233/1DT1-N648 |
| 45103      | 10.21233/1bnj-jq13 |
| 15420      | 10.21233/1ca9-2k79 |
| 24159      | 10.21233/1cnb-m133 |
| 4183       | 10.21233/1csh-9q73 |

|       |                    |
|-------|--------------------|
| 4393  | 10.21233/1csm-st79 |
| 22822 | 10.21233/1ef3-zj56 |
| 4436  | 10.21233/1f47-fs20 |
| 24086 | 10.21233/1fdm-x235 |
| 4239  | 10.21233/1g98-ct07 |
| 17617 | 10.21233/1gkg-2a65 |
| 45322 | 10.21233/1gmy-d414 |
| 18127 | 10.21233/1jd5-2935 |
| 14612 | 10.21233/1ks0-te29 |
| 24084 | 10.21233/1m09-f532 |
| 22683 | 10.21233/1mc2-sy03 |
| 21675 | 10.21233/1pwg-tx22 |
| 20020 | 10.21233/1r8k-p831 |
| 21533 | 10.21233/1sgv-kf95 |
| 15359 | 10.21233/1t37-sc11 |
| 41127 | 10.21233/1tmp-8264 |
| 25273 | 10.21233/1v4w-a061 |
| 24044 | 10.21233/1v7j-4770 |
| 26448 | 10.21233/1vvt-v868 |
| 4387  | 10.21233/1vxd-hm05 |
| 24412 | 10.21233/1vz8-h207 |
| 14264 | 10.21233/1x1e-yt36 |
| 4542  | 10.21233/1xas-kk11 |
| 24076 | 10.21233/20j0-gk71 |
| 4413  | 10.21233/20v9-7e75 |
| 4369  | 10.21233/20xs-m168 |
| 41619 | 10.21233/216r-7y34 |
| 41657 | 10.21233/22yh-z232 |
| 42542 | 10.21233/234z-6f61 |
| 4472  | 10.21233/26e5-b250 |
| 46290 | 10.21233/26yg-qw36 |
| 24595 | 10.21233/271c-xj09 |
| 22732 | 10.21233/272d-vg02 |
| 14639 | 10.21233/27j0-4960 |
| 24195 | 10.21233/28fw-fa08 |
| 4275  | 10.21233/28gf-4635 |
| 45188 | 10.21233/28zd-fk74 |
| 42421 | 10.21233/298g-zr75 |
| 15344 | 10.21233/29yf-f996 |
| 47618 | 10.21233/2DQ3-6153 |
| 16209 | 10.21233/2ac6-fd67 |
| 4348  | 10.21233/2ahm-tx69 |
| 3977  | 10.21233/2arg-mj55 |

|       |                    |
|-------|--------------------|
| 22805 | 10.21233/2b23-jr62 |
| 4127  | 10.21233/2bma-0p82 |
| 4011  | 10.21233/2c89-ct63 |
| 26512 | 10.21233/2cxq-pb51 |
| 40566 | 10.21233/2dyz-ac37 |
| 17717 | 10.21233/2ecb-3b52 |
| 45186 | 10.21233/2fkg-zq79 |
| 4256  | 10.21233/2gfj-a151 |
| 24555 | 10.21233/2hdq-sr31 |
| 24950 | 10.21233/2jhm-6w05 |
| 42568 | 10.21233/2kj1-jp45 |
| 22669 | 10.21233/2ks0-7d19 |
| 24863 | 10.21233/2kym-q693 |
| 17995 | 10.21233/2m53-f907 |
| 17342 | 10.21233/2p2t-qn32 |
| 41380 | 10.21233/2p95-3654 |
| 14549 | 10.21233/2q3p-8t07 |
| 17832 | 10.21233/2q7v-1454 |
| 25514 | 10.21233/2rha-px75 |
| 24665 | 10.21233/2rhp-py68 |
| 15487 | 10.21233/2s88-n175 |
| 22894 | 10.21233/2sa7-q544 |
| 45385 | 10.21233/2tkh-z079 |
| 4385  | 10.21233/2v5v-v203 |
| 19913 | 10.21233/2vzb-bg61 |
| 42645 | 10.21233/2wvj-4383 |
| 41197 | 10.21233/2wxy-fm50 |
| 19264 | 10.21233/2x38-6j55 |
| 4188  | 10.21233/2xk9-gy52 |
| 14797 | 10.21233/2xrb-wn37 |
| 3988  | 10.21233/2yt1-f536 |
| 24516 | 10.21233/2yv5-0c85 |
| 24513 | 10.21233/2yzn-v779 |
| 24633 | 10.21233/30sd-fp85 |
| 25765 | 10.21233/30sw-xp94 |
| 14794 | 10.21233/314t-a768 |
| 15724 | 10.21233/31ah-kk77 |
| 46451 | 10.21233/32mp-be87 |
| 40317 | 10.21233/32se-yq93 |
| 22316 | 10.21233/33pr-sh52 |
| 24532 | 10.21233/349p-7t96 |
| 3875  | 10.21233/34k1-e825 |
| 21830 | 10.21233/34yd-xm12 |

|       |                    |
|-------|--------------------|
| 21726 | 10.21233/3651-zp81 |
| 20163 | 10.21233/36tb-yy55 |
| 22656 | 10.21233/378b-6586 |
| 45731 | 10.21233/37a7-9h33 |
| 16105 | 10.21233/38ev-4529 |
| 40454 | 10.21233/39k5-ew03 |
| 47595 | 10.21233/3B46-2P68 |
| 46726 | 10.21233/3M1B-H276 |
| 46693 | 10.21233/3NKX-DK96 |
| 22681 | 10.21233/3aeh-hs14 |
| 4415  | 10.21233/3emp-8f59 |
| 40945 | 10.21233/3epn-hs17 |
| 41502 | 10.21233/3fmj-ne26 |
| 13079 | 10.21233/3g0t-1t98 |
| 24155 | 10.21233/3hey-1169 |
| 41589 | 10.21233/3hnm-z839 |
| 24286 | 10.21233/3j3b-qm75 |
| 4501  | 10.21233/3jez-g489 |
| 20065 | 10.21233/3jm4-0r55 |
| 21543 | 10.21233/3jx5-m665 |
| 22358 | 10.21233/3kyv-3k70 |
| 46492 | 10.21233/3mhs-jm74 |
| 40490 | 10.21233/3n0e-0283 |
| 24488 | 10.21233/3nc2-mk25 |
| 15292 | 10.21233/3p7k-v248 |
| 15383 | 10.21233/3pbp-d740 |
| 15201 | 10.21233/3pkd-8685 |
| 4168  | 10.21233/3ppz-sz86 |
| 21917 | 10.21233/3prs-zt23 |
| 45377 | 10.21233/3pzj-0y37 |
| 26319 | 10.21233/3qvt-5e15 |
| 17298 | 10.21233/3r9h-5q68 |
| 4293  | 10.21233/3s1a-0h86 |
| 4092  | 10.21233/3vvs-zb43 |
| 24373 | 10.21233/3y80-dr46 |
| 46464 | 10.21233/3yd7-jc96 |
| 46473 | 10.21233/3zmx-5r44 |
| 24524 | 10.21233/3zs9-w545 |
| 41247 | 10.21233/40c4-rg98 |
| 14948 | 10.21233/414e-k787 |
| 22747 | 10.21233/417v-rg61 |
| 15356 | 10.21233/41a2-9620 |
| 45196 | 10.21233/42f5-8f49 |

|       |                    |
|-------|--------------------|
| 24118 | 10.21233/42qq-a716 |
| 17375 | 10.21233/42z3-5s40 |
| 41018 | 10.21233/43vz-0d54 |
| 15831 | 10.21233/44v8-7p56 |
| 45381 | 10.21233/45g4-ry85 |
| 24530 | 10.21233/46s2-ed45 |
| 15003 | 10.21233/48nv-1h83 |
| 47011 | 10.21233/4974-QC65 |
| 24624 | 10.21233/49j0-se42 |
| 4142  | 10.21233/49qd-q283 |
| 47004 | 10.21233/4BAE-XF23 |
| 48649 | 10.21233/4MXX-C134 |
| 46682 | 10.21233/4QB2-3C42 |
| 14270 | 10.21233/4b1p-c888 |
| 4484  | 10.21233/4b53-ep44 |
| 21798 | 10.21233/4b8r-yv06 |
| 4163  | 10.21233/4c5r-s872 |
| 4373  | 10.21233/4cn4-wj75 |
| 4411  | 10.21233/4cn6-3t90 |
| 20156 | 10.21233/4drc-k617 |
| 3975  | 10.21233/4dxg-aq64 |
| 3994  | 10.21233/4dz1-ny70 |
| 24618 | 10.21233/4fc7-8829 |
| 14537 | 10.21233/4fsm-w415 |
| 25767 | 10.21233/4h6f-tx74 |
| 4389  | 10.21233/4j49-be77 |
| 46457 | 10.21233/4jv3-em45 |
| 25007 | 10.21233/4jwe-5f69 |
| 15035 | 10.21233/4k5g-jx08 |
| 45343 | 10.21233/4k7v-pp08 |
| 24495 | 10.21233/4kdn-gp37 |
| 22628 | 10.21233/4m0f-6v70 |
| 4167  | 10.21233/4mp7-wm75 |
| 42722 | 10.21233/4n0x-dj49 |
| 25466 | 10.21233/4prv-bd15 |
| 41224 | 10.21233/4pxw-bm05 |
| 4445  | 10.21233/4r4q-0m97 |
| 4492  | 10.21233/4r7r-4258 |
| 4301  | 10.21233/4rk9-4w51 |
| 42675 | 10.21233/4t3y-1v17 |
| 41222 | 10.21233/4tx7-3a59 |
| 15819 | 10.21233/4vq0-4494 |
| 24356 | 10.21233/4vzb-6v35 |

|       |                    |
|-------|--------------------|
| 21700 | 10.21233/4ydc-n204 |
| 4025  | 10.21233/4z1g-r833 |
| 3951  | 10.21233/4z7r-k050 |
| 22660 | 10.21233/4zaw-zb28 |
| 4045  | 10.21233/4zbw-2h35 |
| 41627 | 10.21233/4zww-1615 |
| 15408 | 10.21233/502z-2a36 |
| 21816 | 10.21233/5076-5v40 |
| 4524  | 10.21233/5179-fn49 |
| 15580 | 10.21233/51kp-1e53 |
| 4198  | 10.21233/52fh-aq29 |
| 15140 | 10.21233/52qv-3g19 |
| 15781 | 10.21233/52yq-b228 |
| 24499 | 10.21233/536b-mm31 |
| 24317 | 10.21233/538q-0k21 |
| 41278 | 10.21233/53ja-ce75 |
| 4403  | 10.21233/53ys-nt12 |
| 14938 | 10.21233/54cn-0794 |
| 15886 | 10.21233/56k5-ng15 |
| 4161  | 10.21233/56se-gy95 |
| 17363 | 10.21233/56yt-6d14 |
| 22730 | 10.21233/576f-8911 |
| 40486 | 10.21233/57g8-9549 |
| 22087 | 10.21233/58t7-6y73 |
| 20281 | 10.21233/596h-wc50 |
| 42563 | 10.21233/59ks-w850 |
| 14957 | 10.21233/59wz-qx78 |
| 48614 | 10.21233/5P77-ZQ05 |
| 47817 | 10.21233/5VZR-YH26 |
| 48363 | 10.21233/5XXJ-GH64 |
| 15191 | 10.21233/5aes-5y61 |
| 45181 | 10.21233/5ayt-5k20 |
| 15768 | 10.21233/5ct3-qj23 |
| 4352  | 10.21233/5d85-6d65 |
| 14911 | 10.21233/5drb-1282 |
| 12023 | 10.21233/5f1j-ch61 |
| 4386  | 10.21233/5gt0-z402 |
| 41098 | 10.21233/5h6b-ds48 |
| 22709 | 10.21233/5hsv-fx24 |
| 41216 | 10.21233/5j3e-pn82 |
| 40795 | 10.21233/5jx5-2077 |
| 24631 | 10.21233/5m52-nd84 |
| 15627 | 10.21233/5m7p-q097 |

|       |                    |
|-------|--------------------|
| 15013 | 10.21233/5mqf-9723 |
| 26563 | 10.21233/5mtf-w128 |
| 4396  | 10.21233/5pbb-z224 |
| 22883 | 10.21233/5qw0-fa47 |
| 45648 | 10.21233/5rcm-aa91 |
| 25163 | 10.21233/5rh4-5f23 |
| 20027 | 10.21233/5rms-aj77 |
| 25837 | 10.21233/5rsn-hm26 |
| 4489  | 10.21233/5ry3-kt92 |
| 14278 | 10.21233/5tbt-ws69 |
| 46459 | 10.21233/5vs6-sq73 |
| 3910  | 10.21233/5wm6-fj81 |
| 43525 | 10.21233/5wvt-cm23 |
| 24091 | 10.21233/5wwk-v219 |
| 46449 | 10.21233/5x6t-y404 |
| 3930  | 10.21233/5xct-6y32 |
| 16009 | 10.21233/5xje-xg37 |
| 15059 | 10.21233/5yf4-yx81 |
| 15919 | 10.21233/5zt0-g990 |
| 21549 | 10.21233/6032-6p09 |
| 24477 | 10.21233/60v1-q871 |
| 214   | 10.21233/612s-t274 |
| 4186  | 10.21233/6144-2g26 |
| 47580 | 10.21233/61K4-QF84 |
| 24053 | 10.21233/61k6-c182 |
| 16131 | 10.21233/620y-dx14 |
| 15494 | 10.21233/626e-7k44 |
| 15864 | 10.21233/62ad-2r14 |
| 26315 | 10.21233/62sj-zk58 |
| 21794 | 10.21233/6344-nb24 |
| 14951 | 10.21233/636g-9n86 |
| 13069 | 10.21233/638z-xp12 |
| 15306 | 10.21233/63x2-2k06 |
| 22749 | 10.21233/64xb-g250 |
| 14674 | 10.21233/65ar-gd68 |
| 4170  | 10.21233/65fw-bj58 |
| 4181  | 10.21233/66zq-3984 |
| 21551 | 10.21233/675d-as47 |
| 3932  | 10.21233/686e-3e44 |
| 41669 | 10.21233/69nc-5r65 |
| 46995 | 10.21233/6G4D-TF71 |
| 47506 | 10.21233/6M1T-DA61 |
| 4409  | 10.21233/6ag1-k287 |

|       |                    |
|-------|--------------------|
| 15740 | 10.21233/6am1-sj67 |
| 14680 | 10.21233/6ans-w752 |
| 24871 | 10.21233/6av9-jx79 |
| 4428  | 10.21233/6b8p-ke79 |
| 20515 | 10.21233/6beq-4462 |
| 19909 | 10.21233/6bhj-jv09 |
| 41214 | 10.21233/6ejf-rt19 |
| 15678 | 10.21233/6enp-3753 |
| 14963 | 10.21233/6es0-qa61 |
| 15876 | 10.21233/6fad-4339 |
| 16207 | 10.21233/6ftv-h112 |
| 20022 | 10.21233/6hft-x335 |
| 14682 | 10.21233/6hga-6436 |
| 15630 | 10.21233/6j0s-ag87 |
| 24312 | 10.21233/6j41-er97 |
| 15259 | 10.21233/6j8r-1g90 |
| 22835 | 10.21233/6kgm-zr91 |
| 46280 | 10.21233/6n58-k786 |
| 41273 | 10.21233/6n89-7w11 |
| 24469 | 10.21233/6p3k-yh02 |
| 41491 | 10.21233/6pe7-xh17 |
| 22986 | 10.21233/6ppf-y854 |
| 15734 | 10.21233/6pqr-ch60 |
| 17391 | 10.21233/6pz8-g423 |
| 15944 | 10.21233/6q36-sr27 |
| 3966  | 10.21233/6q48-7975 |
| 20001 | 10.21233/6qkv-y767 |
| 4084  | 10.21233/6skg-fz77 |
| 4213  | 10.21233/6ter-nj90 |
| 41909 | 10.21233/6tgg-3a45 |
| 15410 | 10.21233/6tzm-ms82 |
| 18108 | 10.21233/6vn0-1104 |
| 22678 | 10.21233/6w4z-z869 |
| 15783 | 10.21233/6xsz-gv46 |
| 24844 | 10.21233/6y4e-ym34 |
| 3990  | 10.21233/6ys9-2m10 |
| 4469  | 10.21233/6yzy-mc78 |
| 47571 | 10.21233/70S7-C853 |
| 4162  | 10.21233/7144-8c50 |
| 4362  | 10.21233/719p-q753 |
| 4319  | 10.21233/71yz-am65 |
| 20175 | 10.21233/72na-hf75 |
| 22723 | 10.21233/72t1-ep33 |

|       |                    |
|-------|--------------------|
| 13055 | 10.21233/7436-ph05 |
| 41426 | 10.21233/76ay-9f41 |
| 16109 | 10.21233/772k-7s80 |
| 21557 | 10.21233/77j4-vn11 |
| 22944 | 10.21233/77r6-x076 |
| 4527  | 10.21233/793y-2a05 |
| 46521 | 10.21233/7E9R-VP36 |
| 46516 | 10.21233/7F5C-W552 |
| 46514 | 10.21233/7M90-YN39 |
| 46698 | 10.21233/7VE7-FM07 |
| 47590 | 10.21233/7WF1-Z606 |
| 4164  | 10.21233/7aj5-ec03 |
| 32426 | 10.21233/7bhz-n612 |
| 15130 | 10.21233/7bsm-hd67 |
| 45092 | 10.21233/7btd-f613 |
| 4225  | 10.21233/7d1m-t529 |
| 41333 | 10.21233/7d1q-6n57 |
| 4382  | 10.21233/7d6z-6j10 |
| 40584 | 10.21233/7dfq-sj65 |
| 22876 | 10.21233/7dvy-1e52 |
| 13097 | 10.21233/7dx1-dt81 |
| 4375  | 10.21233/7emb-xm28 |
| 4296  | 10.21233/7gv9-gq90 |
| 17406 | 10.21233/7hjh-yz55 |
| 45184 | 10.21233/7hq9-gy29 |
| 15153 | 10.21233/7j16-cj20 |
| 24354 | 10.21233/7jm9-qy50 |
| 14995 | 10.21233/7jqj-6h03 |
| 16214 | 10.21233/7k06-yk60 |
| 45111 | 10.21233/7mpt-6z64 |
| 42716 | 10.21233/7mz3-tp55 |
| 46477 | 10.21233/7ntn-k111 |
| 16189 | 10.21233/7ptd-jy37 |
| 15872 | 10.21233/7q6k-xg57 |
| 41419 | 10.21233/7q7t-v963 |
| 4228  | 10.21233/7qh5-4032 |
| 25370 | 10.21233/7qkc-2q02 |
| 24050 | 10.21233/7qsa-xf22 |
| 4143  | 10.21233/7svf-3s04 |
| 3956  | 10.21233/7t0m-0g70 |
| 25230 | 10.21233/7t1e-5e40 |
| 4028  | 10.21233/7tf3-tt41 |
| 25320 | 10.21233/7v49-sj32 |

|       |                    |
|-------|--------------------|
| 18104 | 10.21233/7vwz-dk77 |
| 3889  | 10.21233/7xbe-9k30 |
| 15700 | 10.21233/7xwd-g592 |
| 41527 | 10.21233/7ys6-6178 |
| 41305 | 10.21233/808h-p562 |
| 43533 | 10.21233/81cx-my82 |
| 24528 | 10.21233/826g-j091 |
| 47520 | 10.21233/82XH-AC60 |
| 14535 | 10.21233/82xk-w954 |
| 42649 | 10.21233/82zt-4874 |
| 16241 | 10.21233/833d-sq44 |
| 26565 | 10.21233/833s-n396 |
| 4215  | 10.21233/8370-j585 |
| 22767 | 10.21233/84x5-sc43 |
| 3940  | 10.21233/85fe-n850 |
| 25349 | 10.21233/860r-wq86 |
| 16113 | 10.21233/86rn-w288 |
| 46490 | 10.21233/87r0-d068 |
| 25769 | 10.21233/87x4-w578 |
| 41646 | 10.21233/889v-rw31 |
| 24509 | 10.21233/88nk-cv26 |
| 22936 | 10.21233/88tp-8469 |
| 24996 | 10.21233/88vy-c298 |
| 47537 | 10.21233/89TB-QN51 |
| 41185 | 10.21233/89nd-vd67 |
| 357   | 10.21233/89x4-b040 |
| 46798 | 10.21233/8MN4-HF50 |
| 47866 | 10.21233/8P6K-2P36 |
| 47683 | 10.21233/8PFX-TC23 |
| 25414 | 10.21233/8b03-jg14 |
| 14678 | 10.21233/8bnm-7r08 |
| 45379 | 10.21233/8c8d-g988 |
| 15061 | 10.21233/8d1p-vk58 |
| 41138 | 10.21233/8d9a-qw75 |
| 24319 | 10.21233/8da7-b493 |
| 42566 | 10.21233/8djx-f954 |
| 17381 | 10.21233/8dpm-sk91 |
| 24850 | 10.21233/8ej4-q047 |
| 41345 | 10.21233/8f77-mr38 |
| 24414 | 10.21233/8gmn-8h69 |
| 15667 | 10.21233/8k2x-tx03 |
| 15702 | 10.21233/8k8v-tq87 |
| 17304 | 10.21233/8mna-yv25 |

|       |                    |
|-------|--------------------|
| 24966 | 10.21233/8mp7-5w52 |
| 14631 | 10.21233/8n1y-1h53 |
| 22367 | 10.21233/8pbq-v525 |
| 4441  | 10.21233/8ph7-sh90 |
| 4147  | 10.21233/8q3r-xv28 |
| 15413 | 10.21233/8q9d-e745 |
| 41181 | 10.21233/8rhg-kr24 |
| 20285 | 10.21233/8s7z-k891 |
| 45298 | 10.21233/8sy1-mp41 |
| 22971 | 10.21233/8t5w-8t95 |
| 15922 | 10.21233/8thg-6w60 |
| 4192  | 10.21233/8vjb-ww55 |
| 22773 | 10.21233/8w6z-7x05 |
| 4355  | 10.21233/8w98-fk51 |
| 24906 | 10.21233/8wkf-an28 |
| 41337 | 10.21233/8xqw-a996 |
| 15750 | 10.21233/8xyz-8886 |
| 3935  | 10.21233/8yhz-ht97 |
| 15709 | 10.21233/8zgx-7708 |
| 41102 | 10.21233/9012-tw18 |
| 4115  | 10.21233/9017-sb34 |
| 22908 | 10.21233/90xr-0g13 |
| 24840 | 10.21233/910a-sq22 |
| 25472 | 10.21233/91x9-5829 |
| 4311  | 10.21233/92cn-k485 |
| 41629 | 10.21233/935p-6302 |
| 20128 | 10.21233/93dm-rp40 |
| 4494  | 10.21233/93pf-0q48 |
| 22775 | 10.21233/93vm-fw90 |
| 45105 | 10.21233/94ex-9803 |
| 16107 | 10.21233/94pt-ya63 |
| 45113 | 10.21233/94x4-yd19 |
| 3501  | 10.21233/956t-ek11 |
| 20304 | 10.21233/959q-kw55 |
| 17873 | 10.21233/95n5-xt46 |
| 17689 | 10.21233/964d-n697 |
| 4397  | 10.21233/96th-h554 |
| 24959 | 10.21233/9703-dw51 |
| 41025 | 10.21233/98b3-ep64 |
| 19842 | 10.21233/98bb-am31 |
| 24229 | 10.21233/98da-sj31 |
| 40642 | 10.21233/98xz-ex68 |
| 4040  | 10.21233/98yq-bv63 |



|       |                    |
|-------|--------------------|
| 20171 | 10.21233/99e6-w772 |
| 22788 | 10.21233/99pm-v778 |
| 46680 | 10.21233/9FDV-XK62 |
| 46720 | 10.21233/9Q9F-B230 |
| 3946  | 10.21233/9a5v-f927 |
| 41191 | 10.21233/9b04-ms27 |
| 25188 | 10.21233/9dch-0a13 |
| 42161 | 10.21233/9de9-am39 |
| 24933 | 10.21233/9dw0-k479 |
| 45713 | 10.21233/9e9x-ff23 |
| 24327 | 10.21233/9efw-e650 |
| 22348 | 10.21233/9ekg-p878 |
| 25234 | 10.21233/9esw-7x29 |
| 14266 | 10.21233/9eyq-n046 |
| 4107  | 10.21233/9jtj-a557 |
| 4463  | 10.21233/9jtj-a557 |
| 4247  | 10.21233/9kr8-8s34 |
| 24339 | 10.21233/9mdv-br36 |
| 41489 | 10.21233/9n20-cc52 |
| 40793 | 10.21233/9na2-9193 |
| 3883  | 10.21233/9p75-y227 |
| 46292 | 10.21233/9pc1-0436 |
| 19997 | 10.21233/9pdf-7072 |
| 45331 | 10.21233/9qac-3n20 |
| 17336 | 10.21233/9qv2-xb92 |
| 24388 | 10.21233/9r0t-vm34 |
| 24539 | 10.21233/9sm0-1589 |
| 24441 | 10.21233/9sy2-nj92 |
| 15101 | 10.21233/9vfj-v497 |
| 46471 | 10.21233/9w17-3k66 |
| 15175 | 10.21233/9wfb-c822 |
| 24294 | 10.21233/9x8s-yg68 |
| 40448 | 10.21233/9y2h-5560 |
| 2393  | 10.21233/9yf5-e111 |
| 4462  | 10.21233/9yk4-5092 |
| 46523 | 10.21233/ACHA-AZ30 |
| 47259 | 10.21233/AEXN-ZW54 |
| 46709 | 10.21233/ARN6-PX17 |
| 47587 | 10.21233/B785-Q362 |
| 46611 | 10.21233/BHM0-3F23 |
| 46702 | 10.21233/BP0P-DN34 |
| 48640 | 10.21233/BS0T-C558 |
| 46716 | 10.21233/BTKV-JS74 |

|       |                    |
|-------|--------------------|
| 46522 | 10.21233/C06D-B533 |
| 48656 | 10.21233/CA6B-D485 |
| 46730 | 10.21233/CBMY-KS16 |
| 47606 | 10.21233/D41E-T729 |
| 46648 | 10.21233/DC6G-0117 |
| 48549 | 10.21233/DTAC-5E13 |
| 46655 | 10.21233/E28H-2K97 |
| 46695 | 10.21233/E43F-HA60 |
| 46687 | 10.21233/EAP4-RF36 |
| 48072 | 10.21233/ET35-P931 |
| 47567 | 10.21233/EVQR-8065 |
| 48633 | 10.21233/F0X4-1H86 |
| 47527 | 10.21233/F7JJ-4741 |
| 46998 | 10.21233/F9QR-CV27 |
| 47673 | 10.21233/FD92-M524 |
| 48621 | 10.21233/FEPD-WS38 |
| 48653 | 10.21233/FHH7-2056 |
| 46544 | 10.21233/FJC1-HS98 |
| 47584 | 10.21233/FXA3-JW42 |
| 46645 | 10.21233/GZGE-Q874 |
| 47685 | 10.21233/H8EZ-FB40 |
| 47769 | 10.21233/HBSK-FB02 |
| 46691 | 10.21233/HGKE-GM81 |
| 46841 | 10.21233/HP7D-SQ69 |
| 46718 | 10.21233/JFQ2-0A48 |
| 46711 | 10.21233/JK1S-VG18 |
| 47666 | 10.21233/JVAY-CW81 |
| 47767 | 10.21233/K06E-RW51 |
| 48645 | 10.21233/KG60-S564 |
| 47557 | 10.21233/KHZZ-1827 |
| 47771 | 10.21233/KM96-3E06 |
| 46684 | 10.21233/KSFK-9704 |
| 46650 | 10.21233/KW2V-X806 |
| 48616 | 10.21233/M5WS-VZ46 |
| 46722 | 10.21233/ME1H-RK46 |
| 48666 | 10.21233/MQMR-FV34 |
| 46630 | 10.21233/MYT8-WA75 |
| 47597 | 10.21233/N0RB-YF14 |
| 47621 | 10.21233/N4NQ-VT31 |
| 47504 | 10.21233/N5KS-1603 |
| 47555 | 10.21233/NQHZ-XW16 |
| 47968 | 10.21233/PKYN-3N83 |
| 46806 | 10.21233/PTPQ-QD21 |

|       |                    |
|-------|--------------------|
| 47497 | 10.21233/RC16-FQ24 |
| 47610 | 10.21233/RP9D-AX89 |
| 47494 | 10.21233/S6W8-ZW12 |
| 47663 | 10.21233/SB5J-M528 |
| 47561 | 10.21233/SF72-GR73 |
| 47814 | 10.21233/SGEJ-6H83 |
| 47535 | 10.21233/SZ9R-Q288 |
| 46689 | 10.21233/T58B-SN37 |
| 47564 | 10.21233/TH2T-9121 |
| 48668 | 10.21233/TP5S-FZ74 |
| 48358 | 10.21233/TS9V-G976 |
| 47599 | 10.21233/TSWK-BC56 |
| 47027 | 10.21233/TVV5-YQ86 |
| 48658 | 10.21233/V1MX-0B83 |
| 47604 | 10.21233/V3G5-VF48 |
| 46535 | 10.21233/V7AX-RV90 |
| 46653 | 10.21233/VC03-9R77 |
| 46724 | 10.21233/VSJM-6E28 |
| 47602 | 10.21233/VW7G-2J12 |
| 48222 | 10.21233/VYYE-G931 |
| 47973 | 10.21233/WZFH-NC77 |
| 48611 | 10.21233/X95S-QX49 |
| 46672 | 10.21233/X9TF-0J97 |
| 47687 | 10.21233/XXP4-Z127 |
| 47110 | 10.21233/XZYB-6819 |
| 46659 | 10.21233/YE3D-FJ80 |
| 47671 | 10.21233/YJWS-JJ96 |
| 47502 | 10.21233/YP84-9451 |
| 47608 | 10.21233/YVFH-5B51 |
| 47681 | 10.21233/YWDS-WD04 |
| 46803 | 10.21233/Z852-D390 |
| 48361 | 10.21233/ZF2K-PA43 |
| 46704 | 10.21233/ZJ6P-GR59 |
| 46728 | 10.21233/ZNAR-CF17 |
| 4031  | 10.21233/a033-7j78 |
| 4326  | 10.21233/a049-xf64 |
| 3865  | 10.21233/a0q7-m868 |
| 16099 | 10.21233/a2e7-ky61 |
| 17285 | 10.21233/a40y-j676 |
| 23015 | 10.21233/a4j6-w793 |
| 21895 | 10.21233/a56z-1027 |
| 21919 | 10.21233/a5et-h994 |
| 20160 | 10.21233/a5ym-ww41 |

|       |                    |
|-------|--------------------|
| 15947 | 10.21233/a6gw-a462 |
| 2620  | 10.21233/a7g7-e649 |
| 14614 | 10.21233/a7se-2c50 |
| 22880 | 10.21233/a8eg-rs67 |
| 4245  | 10.21233/a9hx-nb84 |
| 41189 | 10.21233/a9sm-ma36 |
| 26437 | 10.21233/a9x3-nr55 |
| 21921 | 10.21233/aa9j-yp34 |
| 40321 | 10.21233/abcz-q362 |
| 24456 | 10.21233/actv-bj33 |
| 15286 | 10.21233/ad64-ks29 |
| 15929 | 10.21233/ad82-ja20 |
| 21836 | 10.21233/adjr-q523 |
| 24089 | 10.21233/adra-c679 |
| 4269  | 10.21233/ads2-bk31 |
| 24620 | 10.21233/aeqn-c862 |
| 15624 | 10.21233/aetg-rg52 |
| 45345 | 10.21233/aext-h866 |
| 15492 | 10.21233/ajqc-2p38 |
| 16212 | 10.21233/aktj-rk17 |
| 26514 | 10.21233/amj1-fm78 |
| 13047 | 10.21233/anc4-fp20 |
| 45391 | 10.21233/ap4h-y067 |
| 4257  | 10.21233/apjc-5g08 |
| 15007 | 10.21233/ar0p-hj05 |
| 14933 | 10.21233/arn2-5250 |
| 42652 | 10.21233/aryj-gv14 |
| 42559 | 10.21233/asm4-3r71 |
| 24186 | 10.21233/at68-km35 |
| 4360  | 10.21233/atkr-cs63 |
| 14923 | 10.21233/av5q-6587 |
| 16205 | 10.21233/awkk-cx49 |
| 4251  | 10.21233/axz3-2923 |
| 15591 | 10.21233/az3k-5181 |
| 14684 | 10.21233/azmm-9650 |
| 3938  | 10.21233/b0fw-9e91 |
| 4211  | 10.21233/b18z-e808 |
| 2899  | 10.21233/b2cd-db08 |
| 22862 | 10.21233/b2sa-vs04 |
| 4479  | 10.21233/b3av-3w75 |
| 24161 | 10.21233/b40a-qt66 |
| 4548  | 10.21233/b54b-nw94 |
| 45728 | 10.21233/b5h9-pm78 |

|       |                    |
|-------|--------------------|
| 46466 | 10.21233/b62t-vg05 |
| 15793 | 10.21233/b6rr-8867 |
| 24993 | 10.21233/b706-qn93 |
| 4320  | 10.21233/b71k-3606 |
| 41310 | 10.21233/b7c6-fn54 |
| 46483 | 10.21233/b7g3-vh04 |
| 21603 | 10.21233/b9ma-cv72 |
| 15866 | 10.21233/b9nq-n244 |
| 22687 | 10.21233/bax7-sx63 |
| 4082  | 10.21233/bc5s-nr94 |
| 16275 | 10.21233/bcqk-fe25 |
| 41762 | 10.21233/bdex-mm22 |
| 4241  | 10.21233/begd-z059 |
| 15641 | 10.21233/bepp-gp08 |
| 45704 | 10.21233/bfpc-jd87 |
| 4392  | 10.21233/bgsv-qs98 |
| 15106 | 10.21233/bhxy-pk21 |
| 25839 | 10.21233/bjeh-fe46 |
| 15752 | 10.21233/bjqy-em56 |
| 45639 | 10.21233/bkiz-st84 |
| 45329 | 10.21233/bkyg-et47 |
| 20194 | 10.21233/bm1c-7055 |
| 4443  | 10.21233/bp9d-qh60 |
| 45137 | 10.21233/bpfs-3r48 |
| 22969 | 10.21233/bppw-6791 |
| 21913 | 10.21233/bqfq-4x49 |
| 15392 | 10.21233/bqja-m092 |
| 24116 | 10.21233/brk6-dd51 |
| 3945  | 10.21233/brzb-ev42 |
| 21790 | 10.21233/bsv3-k317 |
| 22630 | 10.21233/bswe-2h73 |
| 20316 | 10.21233/bt6r-4598 |
| 15952 | 10.21233/bt73-3f31 |
| 16083 | 10.21233/bt8w-b647 |
| 16115 | 10.21233/bt94-dq60 |
| 30184 | 10.21233/btw4-bh35 |
| 25221 | 10.21233/bv3d-g466 |
| 41212 | 10.21233/bv7h-dw44 |
| 21537 | 10.21233/bvws-hb34 |
| 17322 | 10.21233/bx4k-0v94 |
| 24321 | 10.21233/bx5f-9y20 |
| 24518 | 10.21233/bxa2-pc38 |
| 3984  | 10.21233/bz4w-kv74 |

|       |                    |
|-------|--------------------|
| 42557 | 10.21233/bzbr-4h48 |
| 14134 | 10.21233/bzy2-pe09 |
| 4078  | 10.21233/c09q-sa29 |
| 46488 | 10.21233/c0s8-4k74 |
| 4418  | 10.21233/c1jz-a477 |
| 24645 | 10.21233/c2gf-2j68 |
| 15146 | 10.21233/c3aa-h411 |
| 41537 | 10.21233/c46j-ka17 |
| 16065 | 10.21233/c49c-z514 |
| 45190 | 10.21233/c52w-kn70 |
| 3876  | 10.21233/c5as-w284 |
| 4338  | 10.21233/c60e-p241 |
| 14889 | 10.21233/c69e-2m65 |
| 41308 | 10.21233/c6jy-0927 |
| 15696 | 10.21233/c6pe-5h03 |
| 17344 | 10.21233/c737-1334 |
| 20050 | 10.21233/c7eh-we69 |
| 4450  | 10.21233/c7fs-kf76 |
| 20034 | 10.21233/c8mz-0061 |
| 3900  | 10.21233/c9ps-vy90 |
| 40803 | 10.21233/ca85-bh57 |
| 3868  | 10.21233/caff-6e80 |
| 17371 | 10.21233/cbz6-xb88 |
| 21818 | 10.21233/cc4x-wz63 |
| 45393 | 10.21233/ccqb-dc70 |
| 21828 | 10.21233/cdq2-qq32 |
| 42687 | 10.21233/cecw-sb96 |
| 4283  | 10.21233/cg36-ty75 |
| 41755 | 10.21233/cg7r-v764 |
| 45202 | 10.21233/ch0p-9286 |
| 41614 | 10.21233/ch26-4s93 |
| 24481 | 10.21233/chjr-t175 |
| 20131 | 10.21233/cjmz-5m20 |
| 17352 | 10.21233/ckz2-ef80 |
| 41187 | 10.21233/cm96-6e64 |
| 20306 | 10.21233/cp60-cs35 |
| 1647  | 10.21233/cpgt-b026 |
| 41435 | 10.21233/cqkb-rx04 |
| 41382 | 10.21233/cqtf-2866 |
| 45698 | 10.21233/cr6x-be86 |
| 4308  | 10.21233/cr8f-k669 |
| 4437  | 10.21233/ct1z-ve54 |
| 15396 | 10.21233/ctpk-r067 |

|       |                    |
|-------|--------------------|
| 45655 | 10.21233/cvyt-k021 |
| 25018 | 10.21233/cwpc-7j59 |
| 4120  | 10.21233/cx8d-d024 |
| 16224 | 10.21233/cxev-3204 |
| 41351 | 10.21233/cxq0-9608 |
| 24363 | 10.21233/cxrf-mp20 |
| 16254 | 10.21233/cznd-fg62 |
| 16133 | 10.21233/d01t-8d61 |
| 15588 | 10.21233/d06n-bw32 |
| 41207 | 10.21233/d148-6h03 |
| 22926 | 10.21233/d2tj-p590 |
| 4482  | 10.21233/d47b-gd35 |
| 15187 | 10.21233/d4xx-zn44 |
| 24454 | 10.21233/d6jx-vy62 |
| 20279 | 10.21233/d73q-6954 |
| 45316 | 10.21233/d7f2-p170 |
| 20298 | 10.21233/d917-2x13 |
| 41329 | 10.21233/d9jn-js49 |
| 26433 | 10.21233/daff-1123 |
| 41631 | 10.21233/dayz-mr34 |
| 26608 | 10.21233/dbv5-q164 |
| 15298 | 10.21233/dcm2-wn02 |
| 41928 | 10.21233/dcqy-3516 |
| 41326 | 10.21233/ddey-hy33 |
| 18100 | 10.21233/dds5-cz13 |
| 24097 | 10.21233/dexk-db41 |
| 3991  | 10.21233/dfs- fr27 |
| 15764 | 10.21233/dfzy-sd04 |
| 42001 | 10.21233/dge8-0c88 |
| 4367  | 10.21233/dj3h-f670 |
| 40799 | 10.21233/djae-0e22 |
| 24190 | 10.21233/djqf-s823 |
| 45117 | 10.21233/dm65-7k56 |
| 21807 | 10.21233/dmvc-9j61 |
| 24507 | 10.21233/dngj-0r02 |
| 24046 | 10.21233/dnjr-rs32 |
| 21600 | 10.21233/dpfx-7555 |
| 14624 | 10.21233/dpjk-nw36 |
| 45107 | 10.21233/dptw-0b10 |
| 41298 | 10.21233/dq5k-vq16 |
| 4558  | 10.21233/dqcs-v558 |
| 22988 | 10.21233/dsrz-5k22 |
| 40452 | 10.21233/dtnh-n631 |

|       |                    |
|-------|--------------------|
| 25110 | 10.21233/dvxn-9g46 |
| 24059 | 10.21233/dwfv-m396 |
| 4431  | 10.21233/dwrs-9h77 |
| 4205  | 10.21233/dx45-we16 |
| 25285 | 10.21233/dz7x-af16 |
| 19834 | 10.21233/dzp4-pv02 |
| 45101 | 10.21233/dztb-ga02 |
| 24641 | 10.21233/dzzf-f817 |
| 14635 | 10.21233/e00p-4q45 |
| 15646 | 10.21233/e0q4-t414 |
| 4376  | 10.21233/e1h1-x270 |
| 19817 | 10.21233/e2ez-ep96 |
| 16199 | 10.21233/e2gb-7a78 |
| 21774 | 10.21233/e2hw-ah76 |
| 17402 | 10.21233/e34c-fp95 |
| 24600 | 10.21233/e387-w812 |
| 3995  | 10.21233/e3cd-bd97 |
| 45349 | 10.21233/e3mw-tc57 |
| 26429 | 10.21233/e4p1-1n07 |
| 14648 | 10.21233/e4z3-5t61 |
| 24547 | 10.21233/e523-zp67 |
| 24869 | 10.21233/e5sr-kd56 |
| 4417  | 10.21233/e5sw-b991 |
| 41653 | 10.21233/e7j2-b618 |
| 22803 | 10.21233/e7v0-v862 |
| 4199  | 10.21233/e8bv-7e06 |
| 14523 | 10.21233/e93w-j223 |
| 41760 | 10.21233/eakm-1a87 |
| 524   | 10.21233/ecm1-wf91 |
| 4402  | 10.21233/ecn2-ak50 |
| 20058 | 10.21233/ef79-v217 |
| 15189 | 10.21233/efy3-6z86 |
| 21665 | 10.21233/egh5-v320 |
| 24904 | 10.21233/ehcd-fw95 |
| 26499 | 10.21233/ehet-7b80 |
| 41525 | 10.21233/ehmm-vm11 |
| 16197 | 10.21233/ehwk-t858 |
| 4401  | 10.21233/ehyh-vn64 |
| 41177 | 10.21233/ejfb-t464 |
| 41864 | 10.21233/ek47-9m35 |
| 4287  | 10.21233/emr2-ry49 |
| 22650 | 10.21233/enk7-n978 |
| 15942 | 10.21233/enmq-kb54 |

|       |                    |
|-------|--------------------|
| 22923 | 10.21233/enr7-wa61 |
| 4148  | 10.21233/enzj-0b81 |
| 4442  | 10.21233/epfd-de13 |
| 45701 | 10.21233/epv2-3m87 |
| 40797 | 10.21233/eqhn-8105 |
| 21792 | 10.21233/eqv0-5067 |
| 25845 | 10.21233/ergd-e171 |
| 22826 | 10.21233/es4m-ew33 |
| 4388  | 10.21233/eye6-zs61 |
| 15778 | 10.21233/ez69-yw85 |
| 4258  | 10.21233/eze7-8418 |
| 22992 | 10.21233/f06a-v762 |
| 22910 | 10.21233/f0a8-d318 |
| 40951 | 10.21233/f1r6-n030 |
| 40443 | 10.21233/f2ee-nj62 |
| 4095  | 10.21233/f2r9-2c53 |
| 20289 | 10.21233/f3ba-6s09 |
| 4012  | 10.21233/f3pc-ac31 |
| 24865 | 10.21233/f3pg-3x04 |
| 15221 | 10.21233/f3va-hs11 |
| 25511 | 10.21233/f533-gn18 |
| 16103 | 10.21233/f5x5-y496 |
| 14946 | 10.21233/f630-mb35 |
| 22849 | 10.21233/f70k-ey12 |
| 45395 | 10.21233/f7qr-f244 |
| 25776 | 10.21233/f86j-0362 |
| 4151  | 10.21233/f903-f525 |
| 4364  | 10.21233/fb1t-1r29 |
| 41285 | 10.21233/fb4s-ds71 |
| 16278 | 10.21233/fb6e-1p18 |
| 15399 | 10.21233/fbm9-6394 |
| 4285  | 10.21233/fbsg-8t36 |
| 4063  | 10.21233/fbw1-p392 |
| 15738 | 10.21233/fcvg-km58 |
| 14560 | 10.21233/fd56-pw63 |
| 41766 | 10.21233/fds1-dt10 |
| 3879  | 10.21233/ff82-3p60 |
| 15136 | 10.21233/ffzs-p571 |
| 26431 | 10.21233/fga9-z080 |
| 22397 | 10.21233/fgen-7074 |
| 4423  | 10.21233/fhj7-pj76 |
| 15142 | 10.21233/fhxr-x596 |
| 41034 | 10.21233/fjnd-v956 |

|       |                    |
|-------|--------------------|
| 41764 | 10.21233/fka8-9069 |
| 24465 | 10.21233/fkht-hr86 |
| 24341 | 10.21233/fkrs-q995 |
| 15925 | 10.21233/fm9a-bm03 |
| 24861 | 10.21233/fnc3-w873 |
| 17400 | 10.21233/fnwr-vt02 |
| 45210 | 10.21233/frtz-w434 |
| 14622 | 10.21233/fs4c-mv83 |
| 4316  | 10.21233/fs8n-ec44 |
| 22644 | 10.21233/fs93-kd09 |
| 25340 | 10.21233/fssx-my06 |
| 16111 | 10.21233/fvhw-s571 |
| 16075 | 10.21233/fvkb-9e77 |
| 41497 | 10.21233/fw3s-ft98 |
| 24055 | 10.21233/fw4s-2605 |
| 22734 | 10.21233/fwh3-s335 |
| 4449  | 10.21233/fwvv-4v86 |
| 24937 | 10.21233/fx7m-a985 |
| 42679 | 10.21233/fy68-3t56 |
| 22101 | 10.21233/g0kj-nd32 |
| 16061 | 10.21233/g17d-2n36 |
| 4259  | 10.21233/g1np-hb58 |
| 42681 | 10.21233/g1wf-0z38 |
| 22667 | 10.21233/g20r-jy78 |
| 15394 | 10.21233/g3pw-gj52 |
| 13051 | 10.21233/g3qv-vs64 |
| 22828 | 10.21233/g4aa-8505 |
| 19901 | 10.21233/g546-j142 |
| 21580 | 10.21233/g56e-8205 |
| 40519 | 10.21233/g5jk-1e91 |
| 15288 | 10.21233/g6vy-4j29 |
| 3898  | 10.21233/g6z1-d641 |
| 20018 | 10.21233/g7c8-hk59 |
| 14525 | 10.21233/g7k0-8d93 |
| 41384 | 10.21233/g7x4-c998 |
| 40577 | 10.21233/g8pp-n508 |
| 40666 | 10.21233/g9hf-1t92 |
| 25435 | 10.21233/g9v8-1z05 |
| 4279  | 10.21233/gar4-ty16 |
| 15099 | 10.21233/gb30-9e28 |
| 15762 | 10.21233/gd2j-5k10 |
| 22623 | 10.21233/gdbt-zp90 |
| 21541 | 10.21233/gdtp-j631 |

|       |                    |
|-------|--------------------|
| 24216 | 10.21233/ge5b-h872 |
| 45351 | 10.21233/geb4-ch43 |
| 22706 | 10.21233/gfg1-ee16 |
| 4137  | 10.21233/gg82-s427 |
| 42683 | 10.21233/ggnn-mk26 |
| 25275 | 10.21233/gh60-9e82 |
| 22636 | 10.21233/gjbn-9951 |
| 25551 | 10.21233/gjvj-6s89 |
| 45695 | 10.21233/gmdn-sh18 |
| 46481 | 10.21233/gmfj-ka45 |
| 22658 | 10.21233/gmht-f823 |
| 22784 | 10.21233/gmhy-nn21 |
| 15955 | 10.21233/gmm9-y553 |
| 23004 | 10.21233/gmp0-vr07 |
| 26505 | 10.21233/gn10-hw94 |
| 25470 | 10.21233/gnb0-9516 |
| 3893  | 10.21233/gp8m-6z07 |
| 14884 | 10.21233/gpa8-an56 |
| 43513 | 10.21233/gpyr-c840 |
| 25368 | 10.21233/gq49-ep38 |
| 22874 | 10.21233/grf4-q917 |
| 46469 | 10.21233/grh1-ap74 |
| 24080 | 10.21233/gsax-vn12 |
| 21938 | 10.21233/gt52-mt02 |
| 24522 | 10.21233/gtyp-4x27 |
| 24298 | 10.21233/gve7-qt51 |
| 14276 | 10.21233/gvk8-r723 |
| 15032 | 10.21233/gw2b-x179 |
| 4410  | 10.21233/gw72-9x54 |
| 41456 | 10.21233/gwdm-cz78 |
| 40450 | 10.21233/gwh3-1a93 |
| 25763 | 10.21233/gwnk-ry08 |
| 4171  | 10.21233/gwts-9s82 |
| 16124 | 10.21233/gxbr-bj21 |
| 14521 | 10.21233/gxdp-2n47 |
| 15935 | 10.21233/gxny-ma10 |
| 4461  | 10.21233/gy1d-0c88 |
| 24570 | 10.21233/gy4b-s732 |
| 17368 | 10.21233/gyh8-pb41 |
| 4358  | 10.21233/gzqy-9x14 |
| 24221 | 10.21233/h1k4-fg42 |
| 20024 | 10.21233/h1s8-8h96 |
| 4531  | 10.21233/h1sz-c208 |

|       |                    |
|-------|--------------------|
| 4136  | 10.21233/h27c-dp97 |
| 22942 | 10.21233/h3bs-6188 |
| 24039 | 10.21233/h3rm-sh19 |
| 40992 | 10.21233/h3x5-xz62 |
| 24479 | 10.21233/h4cf-f980 |
| 40940 | 10.21233/h4gb-ka72 |
| 20295 | 10.21233/h5hf-4g09 |
| 4485  | 10.21233/h5wh-mm89 |
| 22890 | 10.21233/h657-1t24 |
| 41543 | 10.21233/h686-6m80 |
| 17713 | 10.21233/h72j-y982 |
| 4473  | 10.21233/h75a-p298 |
| 4424  | 10.21233/h7g7-g111 |
| 22797 | 10.21233/h8w0-4796 |
| 46131 | 10.21233/h94p-kc68 |
| 4317  | 10.21233/h9er-kf81 |
| 15327 | 10.21233/h9hp-vp69 |
| 22795 | 10.21233/h9zx-zt71 |
| 15331 | 10.21233/haqy-4x05 |
| 22807 | 10.21233/hbv9-4k46 |
| 4184  | 10.21233/hbws-c483 |
| 14274 | 10.21233/hca1-3g26 |
| 41842 | 10.21233/hcna-tv25 |
| 3927  | 10.21233/hd31-6942 |
| 15081 | 10.21233/hdeg-rn31 |
| 16236 | 10.21233/hf5z-sc17 |
| 4421  | 10.21233/hfmb-2e61 |
| 24188 | 10.21233/hfzm-9410 |
| 25384 | 10.21233/hg69-1m77 |
| 22976 | 10.21233/hga1-m504 |
| 24305 | 10.21233/hgah-yb23 |
| 26501 | 10.21233/hgw1-8c70 |
| 4435  | 10.21233/hhdq-x585 |
| 24183 | 10.21233/hhxv-jy21 |
| 4086  | 10.21233/hk80-jj60 |
| 15417 | 10.21233/hkn5-4a59 |
| 21553 | 10.21233/hmq8-hm34 |
| 22400 | 10.21233/hnsc-1p36 |
| 15302 | 10.21233/hpc1-5c65 |
| 44896 | 10.21233/hpgt-nm06 |
| 41264 | 10.21233/hqp0-6z14 |
| 39749 | 10.21233/hr41-mn70 |
| 15776 | 10.21233/hrkc-qm74 |

|       |                    |
|-------|--------------------|
| 20014 | 10.21233/hsdf-hx86 |
| 41235 | 10.21233/htm2-cw28 |
| 15157 | 10.21233/htpm-ac79 |
| 21893 | 10.21233/hvvv-sy31 |
| 15074 | 10.21233/hwnh-8509 |
| 1578  | 10.21233/hxd2-5546 |
| 24157 | 10.21233/hxme-qv81 |
| 22330 | 10.21233/hyt5-1v77 |
| 17326 | 10.21233/j01p-4677 |
| 23008 | 10.21233/j0sm-9z75 |
| 14645 | 10.21233/j0zd-6071 |
| 17396 | 10.21233/j12t-e851 |
| 24143 | 10.21233/j1k9-2922 |
| 14410 | 10.21233/j2hz-1p75 |
| 14626 | 10.21233/j36k-8t44 |
| 40441 | 10.21233/j3jg-qz14 |
| 24848 | 10.21233/j4jk-zw12 |
| 22714 | 10.21233/j5ga-dr77 |
| 24360 | 10.21233/j694-t641 |
| 41499 | 10.21233/j6p7-zb53 |
| 41226 | 10.21233/j71m-0095 |
| 15290 | 10.21233/j8q3-sm07 |
| 24390 | 10.21233/j97k-ds95 |
| 24256 | 10.21233/j9as-rt69 |
| 40861 | 10.21233/ja1n-6b46 |
| 4555  | 10.21233/jact-n751 |
| 15789 | 10.21233/jc66-m526 |
| 20068 | 10.21233/jcdm-8a49 |
| 3926  | 10.21233/jdgv-9y34 |
| 24576 | 10.21233/jdtq-9666 |
| 10967 | 10.21233/je2r-dk10 |
| 25477 | 10.21233/jec9-1e73 |
| 4017  | 10.21233/jf00-3j79 |
| 4138  | 10.21233/jgh0-2062 |
| 3892  | 10.21233/jgxs-ey74 |
| 3941  | 10.21233/jhaq-tk78 |
| 15597 | 10.21233/jhh6-7q75 |
| 16184 | 10.21233/jhwb-y436 |
| 4493  | 10.21233/jjat-b004 |
| 41283 | 10.21233/jjez-hm35 |
| 4071  | 10.21233/jkhn-6f57 |
| 41163 | 10.21233/jky8-1c56 |
| 40958 | 10.21233/jm6d-3395 |

|       |                    |
|-------|--------------------|
| 22642 | 10.21233/jm78-za93 |
| 15931 | 10.21233/jmze-9037 |
| 4156  | 10.21233/jnne-vy86 |
| 21788 | 10.21233/jnyr-4x96 |
| 41467 | 10.21233/jpfc-1908 |
| 19967 | 10.21233/jqgd-sd88 |
| 41389 | 10.21233/jqs1-hj70 |
| 24042 | 10.21233/jrvd-m892 |
| 24526 | 10.21233/jsc2-rn41 |
| 16177 | 10.21233/jsh7-n919 |
| 24034 | 10.21233/jsj1-4861 |
| 40976 | 10.21233/jvxc-rw58 |
| 24461 | 10.21233/jvxq-h196 |
| 22973 | 10.21233/jvze-zx40 |
| 46445 | 10.21233/jw93-c102 |
| 42555 | 10.21233/jwt1-1r97 |
| 22964 | 10.21233/jxea-ce51 |
| 21606 | 10.21233/jxj8-mf14 |
| 20188 | 10.21233/jyp9-k385 |
| 22698 | 10.21233/jyz6-4566 |
| 4306  | 10.21233/k0vt-tc67 |
| 4010  | 10.21233/k0xz-ct85 |
| 23000 | 10.21233/k1e4-xe95 |
| 40111 | 10.21233/k2nt-2b74 |
| 24857 | 10.21233/k38b-1167 |
| 4398  | 10.21233/k41y-rh60 |
| 15489 | 10.21233/k4wy-0k33 |
| 4467  | 10.21233/k4zb-ze21 |
| 15892 | 10.21233/k58q-9d96 |
| 42692 | 10.21233/k65h-1n80 |
| 21762 | 10.21233/k9vz-2659 |
| 14554 | 10.21233/ka3z-1h69 |
| 24842 | 10.21233/kakk-r623 |
| 34553 | 10.21233/kb77-8r67 |
| 19266 | 10.21233/kcep-vj71 |
| 4114  | 10.21233/kdkc-ke07 |
| 41320 | 10.21233/ke7a-vf58 |
| 21744 | 10.21233/kefv-nq34 |
| 22892 | 10.21233/keqf-m247 |
| 25468 | 10.21233/kf0z-p180 |
| 41399 | 10.21233/kfbq-jw42 |
| 24323 | 10.21233/kfxk-5f39 |
| 19906 | 10.21233/khvf-ha85 |

|       |                    |
|-------|--------------------|
| 15185 | 10.21233/kkjd-pf71 |
| 14527 | 10.21233/kkn8-9202 |
| 3953  | 10.21233/kmvh-v620 |
| 45170 | 10.21233/kn4a-fd55 |
| 42689 | 10.21233/kngt-v975 |
| 39364 | 10.21233/kpgn-4r23 |
| 15350 | 10.21233/kph1-ps34 |
| 15970 | 10.21233/kq0a-zm89 |
| 17419 | 10.21233/krp4-jk87 |
| 17387 | 10.21233/krw5-yg76 |
| 40484 | 10.21233/kt03-8t61 |
| 20183 | 10.21233/kts9-1316 |
| 4174  | 10.21233/kvx4-xd52 |
| 17357 | 10.21233/kw77-m233 |
| 15814 | 10.21233/kxff-0a77 |
| 24622 | 10.21233/kzqk-jj13 |
| 15379 | 10.21233/m06f-by70 |
| 41634 | 10.21233/m0yb-sp15 |
| 15242 | 10.21233/m16f-gh96 |
| 24939 | 10.21233/m1n7-n027 |
| 3869  | 10.21233/m1s8-qh32 |
| 14997 | 10.21233/m1ty-fz61 |
| 41243 | 10.21233/m24p-3135 |
| 13032 | 10.21233/m2a2-qq61 |
| 40574 | 10.21233/m2sf-vp33 |
| 25455 | 10.21233/m32v-dn19 |
| 22966 | 10.21233/m3rj-t898 |
| 41161 | 10.21233/m3wr-jd95 |
| 25186 | 10.21233/m4nq-s295 |
| 19812 | 10.21233/m57c-a803 |
| 808   | 10.21233/m5dr-hs85 |
| 22887 | 10.21233/m5mg-k090 |
| 4139  | 10.21233/m5qy-sh73 |
| 21844 | 10.21233/m6at-pw62 |
| 3971  | 10.21233/m7cb-vr77 |
| 46475 | 10.21233/m7cc-0639 |
| 21651 | 10.21233/m7v2-ks06 |
| 22720 | 10.21233/m8cg-s095 |
| 14921 | 10.21233/m8m6-rn46 |
| 26321 | 10.21233/m8qj-bz64 |
| 22726 | 10.21233/m8xc-ez05 |
| 41140 | 10.21233/ma1q-f261 |
| 3972  | 10.21233/ma29-1k87 |

|       |                    |
|-------|--------------------|
| 22322 | 10.21233/mbbn-ff92 |
| 24551 | 10.21233/mbst-4266 |
| 15088 | 10.21233/mce3-kp31 |
| 22376 | 10.21233/mczv-f712 |
| 21903 | 10.21233/me0e-ze15 |
| 22896 | 10.21233/me4r-tx16 |
| 16231 | 10.21233/mf7y-nm83 |
| 4299  | 10.21233/mfht-2e09 |
| 41612 | 10.21233/mgtf-q479 |
| 15829 | 10.21233/mgv7-z770 |
| 14643 | 10.21233/mhdv-6n63 |
| 15005 | 10.21233/mhya-2v27 |
| 17334 | 10.21233/mj04-mx52 |
| 22751 | 10.21233/mjwh-t327 |
| 41262 | 10.21233/mjzm-jv11 |
| 4060  | 10.21233/mk13-rb17 |
| 45311 | 10.21233/mks1-mt36 |
| 40582 | 10.21233/mky9-a533 |
| 41446 | 10.21233/mmtn-dv23 |
| 4133  | 10.21233/mnay-8z91 |
| 25133 | 10.21233/mpd1-a275 |
| 22685 | 10.21233/mqcv-z280 |
| 29236 | 10.21233/mqh5-7z20 |
| 21708 | 10.21233/mqtv-9820 |
| 41199 | 10.21233/mrq9-0a25 |
| 4223  | 10.21233/mtkm-0h07 |
| 4446  | 10.21233/mtmk-d772 |
| 41314 | 10.21233/mw33-kd49 |
| 4201  | 10.21233/mybh-v067 |
| 3996  | 10.21233/mzrc-8w03 |
| 22718 | 10.21233/n0v4-yj40 |
| 25268 | 10.21233/n1n7-ya12 |
| 40634 | 10.21233/n1v6-tq67 |
| 239   | 10.21233/n3002s    |
| 1694  | 10.21233/n3016n    |
| 2328  | 10.21233/n3018d    |
| 3132  | 10.21233/n3020q    |
| 203   | 10.21233/n30302    |
| 2065  | 10.21233/n3036b    |
| 260   | 10.21233/n3040d    |
| 2297  | 10.21233/n30472    |
| 2905  | 10.21233/n3049t    |
| 802   | 10.21233/n3061g    |



|      |                 |
|------|-----------------|
| 1606 | 10.21233/n3064m |
| 1840 | 10.21233/n30650 |
| 225  | 10.21233/n30684 |
| 858  | 10.21233/n3070f |
| 1661 | 10.21233/n3073k |
| 365  | 10.21233/n30896 |
| 1805 | 10.21233/n30938 |
| 11   | 10.21233/n3097s |
| 823  | 10.21233/n3099j |
| 1442 | 10.21233/n30b1v |
| 1860 | 10.21233/n30b3m |
| 2663 | 10.21233/n30b5c |
| 1574 | 10.21233/n30d2x |
| 2054 | 10.21233/n30f3n |
| 332  | 10.21233/n30g64 |
| 1144 | 10.21233/n30g8w |
| 1543 | 10.21233/n30h06 |
| 1769 | 10.21233/n30h1k |
| 790  | 10.21233/n30h6g |
| 1595 | 10.21233/n30h9m |
| 2022 | 10.21233/n30j0j |
| 2627 | 10.21233/n30j29 |
| 298  | 10.21233/n30k65 |
| 518  | 10.21233/n30k7j |
| 1965 | 10.21233/n30m1m |
| 2364 | 10.21233/n30m3c |
| 354  | 10.21233/n30m6h |
| 1563 | 10.21233/n30n0k |
| 2596 | 10.21233/n30n3q |
| 2332 | 10.21233/n30q1n |
| 540  | 10.21233/n30q55 |
| 1987 | 10.21233/n30q9p |
| 2385 | 10.21233/n30r10 |
| 1697 | 10.21233/n30s80 |
| 507  | 10.21233/n30t3f |
| 1133 | 10.21233/n30t6k |
| 230  | 10.21233/n30w34 |
| 1664 | 10.21233/n30w7n |
| 287  | 10.21233/n30x23 |
| 688  | 10.21233/n30x3g |
| 1718 | 10.21233/n30x70 |
| 3558 | 10.21233/n30z2f |
| 1445 | 10.21233/n3106m |

|      |                 |
|------|-----------------|
| 1864 | 10.21233/n31070 |
| 2267 | 10.21233/n3108c |
| 68   | 10.21233/n3110p |
| 1632 | 10.21233/n31358 |
| 1831 | 10.21233/n3136n |
| 850  | 10.21233/n3142g |
| 1886 | 10.21233/n3145m |
| 2289 | 10.21233/n31460 |
| 1598 | 10.21233/n3164x |
| 2025 | 10.21233/n31659 |
| 2630 | 10.21233/n3168f |
| 1434 | 10.21233/n3173w |
| 1852 | 10.21233/n3175n |
| 978  | 10.21233/n3191t |
| 1795 | 10.21233/n3194z |
| 1621 | 10.21233/n31b2j |
| 2650 | 10.21233/n31b62 |
| 3050 | 10.21233/n31b7f |
| 3452 | 10.21233/n31b8t |
| 1566 | 10.21233/n31d1v |
| 2388 | 10.21233/n31d40 |
| 1001 | 10.21233/n31d9w |
| 1819 | 10.21233/n31f2k |
| 2619 | 10.21233/n31f4b |
| 324  | 10.21233/n31g7t |
| 1136 | 10.21233/n31g9k |
| 1587 | 10.21233/n31h9x |
| 510  | 10.21233/n31k6g |
| 691  | 10.21233/n31k7v |
| 1158 | 10.21233/n31m8k |
| 1979 | 10.21233/n31n0w |
| 2588 | 10.21233/n31n31 |
| 1688 | 10.21233/n31p9n |
| 2323 | 10.21233/n31q1z |
| 311  | 10.21233/n31q3q |
| 532  | 10.21233/n31q43 |
| 2955 | 10.21233/n31r32 |
| 3582 | 10.21233/n31r5t |
| 254  | 10.21233/n31s4s |
| 1890 | 10.21233/n31s9p |
| 2292 | 10.21233/n31t10 |
| 496  | 10.21233/n31t44 |
| 1522 | 10.21233/n31t78 |

|      |                 |
|------|-----------------|
| 219  | 10.21233/n31w22 |
| 853  | 10.21233/n31w4t |
| 1254 | 10.21233/n31w6k |
| 1656 | 10.21233/n31w7z |
| 278  | 10.21233/n31x2d |
| 2312 | 10.21233/n31x92 |
| 818  | 10.21233/n3203s |
| 1437 | 10.21233/n3205j |
| 2888 | 10.21233/n3219d |
| 2049 | 10.21233/n3236z |
| 2622 | 10.21233/n32393 |
| 841  | 10.21233/n3242s |
| 3483 | 10.21233/n3250c |
| 1590 | 10.21233/n32647 |
| 2017 | 10.21233/n3265m |
| 1844 | 10.21233/n32736 |
| 2642 | 10.21233/n3277q |
| 1161 | 10.21233/n3290r |
| 1786 | 10.21233/n3293w |
| 2591 | 10.21233/n3295n |
| 993  | 10.21233/n32995 |
| 1611 | 10.21233/n32b1g |
| 3042 | 10.21233/n32b50 |
| 314  | 10.21233/n32c8g |
| 535  | 10.21233/n32c9v |
| 1982 | 10.21233/n32d3x |
| 369  | 10.21233/n32d8t |
| 772  | 10.21233/n32d96 |
| 1810 | 10.21233/n32f38 |
| 2611 | 10.21233/n32f51 |
| 720  | 10.21233/n32g8h |
| 2348 | 10.21233/n32h3z |
| 336  | 10.21233/n32h63 |
| 1773 | 10.21233/n32j05 |
| 2579 | 10.21233/n32j4p |
| 281  | 10.21233/n32k5d |
| 1149 | 10.21233/n32m8w |
| 1547 | 10.21233/n32m98 |
| 1969 | 10.21233/n32n06 |
| 2368 | 10.21233/n32n1k |
| 1679 | 10.21233/n32p9z |
| 303  | 10.21233/n32q4d |
| 32   | 10.21233/n32s3q |

|      |                 |
|------|-----------------|
| 267  | 10.21233/n32t32 |
| 488  | 10.21233/n32t4f |
| 1701 | 10.21233/n32t7k |
| 210  | 10.21233/n32w2c |
| 1648 | 10.21233/n32w78 |
| 1847 | 10.21233/n32w8n |
| 672  | 10.21233/n32x33 |
| 9    | 10.21233/n3301b |
| 1615 | 10.21233/n33067 |
| 2645 | 10.21233/n33109 |
| 1450 | 10.21233/n33156 |
| 1868 | 10.21233/n3317z |
| 2614 | 10.21233/n33381 |
| 2061 | 10.21233/n33457 |
| 3468 | 10.21233/n3350p |
| 1581 | 10.21233/n33635 |
| 1776 | 10.21233/n3364j |
| 2006 | 10.21233/n3365x |
| 339  | 10.21233/n33894 |
| 525  | 10.21233/n33902 |
| 1153 | 10.21233/n3392t |
| 2371 | 10.21233/n3396b |
| 2583 | 10.21233/n3397q |
| 306  | 10.21233/n33c7d |
| 361  | 10.21233/n33d7r |
| 2603 | 10.21233/n33f5b |
| 1704 | 10.21233/n33h1h |
| 2340 | 10.21233/n33h38 |
| 328  | 10.21233/n33h51 |
| 271  | 10.21233/n33k63 |
| 675  | 10.21233/n33k8v |
| 514  | 10.21233/n33m6f |
| 3775 | 10.21233/n33n6s |
| 238  | 10.21233/n33p4c |
| 1671 | 10.21233/n33p98 |
| 294  | 10.21233/n33q4q |
| 1107 | 10.21233/n33q7v |
| 2327 | 10.21233/n33r1x |
| 835  | 10.21233/n33s5s |
| 2673 | 10.21233/n33t1m |
| 259  | 10.21233/n33t20 |
| 2904 | 10.21233/n33v1z |
| 202  | 10.21233/n33w32 |

|      |                 |
|------|-----------------|
| 2637 | 10.21233/n33x21 |
| 857  | 10.21233/n33x55 |
| 1894 | 10.21233/n33x9p |
| 3500 | 10.21233/n33z3r |
| 801  | 10.21233/n3403d |
| 224  | 10.21233/n3410m |
| 1441 | 10.21233/n34144 |
| 1859 | 10.21233/n3415h |
| 364  | 10.21233/n34309 |
| 1804 | 10.21233/n34356 |
| 1010 | 10.21233/n34411 |
| 1628 | 10.21233/n3443s |
| 2053 | 10.21233/n34445 |
| 3060 | 10.21233/n34479 |
| 331  | 10.21233/n3460b |
| 1768 | 10.21233/n3464v |
| 2396 | 10.21233/n34670 |
| 788  | 10.21233/n34712 |
| 1594 | 10.21233/n34746 |
| 1826 | 10.21233/n3475k |
| 2626 | 10.21233/n3477b |
| 517  | 10.21233/n3489f |
| 1542 | 10.21233/n3493h |
| 1964 | 10.21233/n3494w |
| 2363 | 10.21233/n34958 |
| 352  | 10.21233/n3498d |
| 974  | 10.21233/n34b0q |
| 1791 | 10.21233/n34b2g |
| 1111 | 10.21233/n34c9g |
| 1733 | 10.21233/n34d25 |
| 539  | 10.21233/n34d72 |
| 1562 | 10.21233/n34f14 |
| 1986 | 10.21233/n34f2h |
| 2384 | 10.21233/n34f3w |
| 1696 | 10.21233/n34h1t |
| 318  | 10.21233/n34h6q |
| 1755 | 10.21233/n34j15 |
| 860  | 10.21233/n34k85 |
| 285  | 10.21233/n34m6r |
| 506  | 10.21233/n34m74 |
| 2352 | 10.21233/n34n2k |
| 3557 | 10.21233/n34n63 |
| 1444 | 10.21233/n34p7t |

|      |                 |
|------|-----------------|
| 1663 | 10.21233/n34p86 |
| 1862 | 10.21233/n34p9k |
| 2319 | 10.21233/n34r0v |
| 1631 | 10.21233/n34s87 |
| 2266 | 10.21233/n34t0j |
| 2665 | 10.21233/n34t29 |
| 250  | 10.21233/n34t3p |
| 1684 | 10.21233/n34t76 |
| 1885 | 10.21233/n34t8k |
| 792  | 10.21233/n34w54 |
| 2629 | 10.21233/n34x1z |
| 215  | 10.21233/n34x3q |
| 849  | 10.21233/n34x5g |
| 977  | 10.21233/n3503q |
| 1794 | 10.21233/n3506v |
| 1433 | 10.21233/n3515t |
| 2649 | 10.21233/n3518z |
| 356  | 10.21233/n35310 |
| 543  | 10.21233/n3532c |
| 2598 | 10.21233/n35391 |
| 1000 | 10.21233/n3542q |
| 1818 | 10.21233/n3545v |
| 2045 | 10.21233/n35467 |
| 1135 | 10.21233/n3562d |
| 2013 | 10.21233/n3574h |
| 2618 | 10.21233/n3577n |
| 509  | 10.21233/n3589r |
| 2355 | 10.21233/n3595k |
| 343  | 10.21233/n3597b |
| 966  | 10.21233/n35993 |
| 1157 | 10.21233/n35b01 |
| 2587 | 10.21233/n35b4j |
| 531  | 10.21233/n35d8r |
| 3790 | 10.21233/n35f83 |
| 253  | 10.21233/n35g6p |
| 1687 | 10.21233/n35h14 |
| 495  | 10.21233/n35h7d |
| 715  | 10.21233/n35h8s |
| 2954 | 10.21233/n35j50 |
| 852  | 10.21233/n35k73 |
| 1655 | 10.21233/n35m0s |
| 1889 | 10.21233/n35m15 |
| 679  | 10.21233/n35m5p |

|      |                 |
|------|-----------------|
| 1709 | 10.21233/n35m96 |
| 2922 | 10.21233/n35n38 |
| 3149 | 10.21233/n35n4n |
| 1854 | 10.21233/n35q0t |
| 2652 | 10.21233/n35q4b |
| 873  | 10.21233/n35q7g |
| 2311 | 10.21233/n35r2x |
| 1003 | 10.21233/n35s6s |
| 1623 | 10.21233/n35s8j |
| 2048 | 10.21233/n35s9x |
| 27   | 10.21233/n35t17 |
| 782  | 10.21233/n35w3p |
| 2016 | 10.21233/n35w8k |
| 206  | 10.21233/n35x18 |
| 1028 | 10.21233/n35x4d |
| 2068 | 10.21233/n35x7j |
| 3482 | 10.21233/n35z20 |
| 346  | 10.21233/n3602n |
| 969  | 10.21233/n3604d |
| 2590 | 10.21233/n36099 |
| 805  | 10.21233/n36120 |
| 1610 | 10.21233/n36154 |
| 1843 | 10.21233/n3616h |
| 3041 | 10.21233/n3620k |
| 534  | 10.21233/n36319 |
| 1160 | 10.21233/n3634f |
| 1981 | 10.21233/n36366 |
| 2378 | 10.21233/n3637k |
| 1391 | 10.21233/n3643d |
| 1809 | 10.21233/n3644s |
| 2610 | 10.21233/n3647x |
| 313  | 10.21233/n36591 |
| 719  | 10.21233/n3660z |
| 1524 | 10.21233/n36633 |
| 1577 | 10.21233/n3673f |
| 2001 | 10.21233/n3674t |
| 2347 | 10.21233/n3695w |
| 335  | 10.21233/n36981 |
| 1148 | 10.21233/n36b0b |
| 1546 | 10.21233/n36b23 |
| 1772 | 10.21233/n36b3g |
| 1968 | 10.21233/n36b4v |
| 2578 | 10.21233/n36b6m |

|      |                 |
|------|-----------------|
| 682  | 10.21233/n36c93 |
| 876  | 10.21233/n36d01 |
| 2314 | 10.21233/n36d5x |
| 302  | 10.21233/n36d82 |
| 2367 | 10.21233/n36f4w |
| 245  | 10.21233/n36g60 |
| 1880 | 10.21233/n36h1f |
| 2335 | 10.21233/n36j25 |
| 31   | 10.21233/n36k5n |
| 209  | 10.21233/n36k61 |
| 843  | 10.21233/n36k8s |
| 671  | 10.21233/n36m6c |
| 1904 | 10.21233/n36n0f |
| 8    | 10.21233/n36p49 |
| 2644 | 10.21233/n36q38 |
| 234  | 10.21233/n36q51 |
| 1667 | 10.21233/n36q9j |
| 2303 | 10.21233/n36r1v |
| 995  | 10.21233/n36s5q |
| 1397 | 10.21233/n36s63 |
| 1448 | 10.21233/n36t7t |
| 1867 | 10.21233/n36t86 |
| 2669 | 10.21233/n36v0h |
| 3074 | 10.21233/n36v28 |
| 774  | 10.21233/n36w5r |
| 1580 | 10.21233/n36w7h |
| 2005 | 10.21233/n36w8w |
| 1635 | 10.21233/n36x6g |
| 1152 | 10.21233/n3704q |
| 1775 | 10.21233/n3706g |
| 796  | 10.21233/n3713p |
| 1601 | 10.21233/n3715f |
| 2633 | 10.21233/n3719z |
| 3033 | 10.21233/n3720w |
| 1549 | 10.21233/n3734r |
| 1972 | 10.21233/n3736h |
| 490  | 10.21233/n3761n |
| 547  | 10.21233/n37710 |
| 1569 | 10.21233/n37744 |
| 1763 | 10.21233/n3775h |
| 269  | 10.21233/n37880 |
| 1703 | 10.21233/n3793f |
| 327  | 10.21233/n3797z |

|      |                 |
|------|-----------------|
| 513  | 10.21233/n3798b |
| 1139 | 10.21233/n37b0n |
| 1959 | 10.21233/n37b2d |
| 3774 | 10.21233/n37b92 |
| 867  | 10.21233/n37c9d |
| 1670 | 10.21233/n37d23 |
| 699  | 10.21233/n37d70 |
| 1105 | 10.21233/n37d9r |
| 1725 | 10.21233/n37f12 |
| 3565 | 10.21233/n37f7b |
| 20   | 10.21233/n37g69 |
| 2326 | 10.21233/n37j47 |
| 3130 | 10.21233/n37j60 |
| 834  | 10.21233/n37k7q |
| 1639 | 10.21233/n37m0d |
| 2063 | 10.21233/n37m1s |
| 258  | 10.21233/n37m4x |
| 2903 | 10.21233/n37n48 |
| 1604 | 10.21233/n37p9h |
| 1837 | 10.21233/n37q0f |
| 856  | 10.21233/n37q6q |
| 1659 | 10.21233/n37q9v |
| 3499 | 10.21233/n37r5p |
| 363  | 10.21233/n37s4n |
| 987  | 10.21233/n37s6d |
| 1803 | 10.21233/n37s85 |
| 821  | 10.21233/n37t40 |
| 1440 | 10.21233/n37t6r |
| 1627 | 10.21233/n37t74 |
| 2262 | 10.21233/n37v0t |
| 2661 | 10.21233/n37v16 |
| 550  | 10.21233/n37w39 |
| 1572 | 10.21233/n37w7t |
| 2395 | 10.21233/n37w9k |
| 1008 | 10.21233/n37x41 |
| 2625 | 10.21233/n37x9x |
| 330  | 10.21233/n3801w |
| 1142 | 10.21233/n3803n |
| 1541 | 10.21233/n3805d |
| 973  | 10.21233/n38130 |
| 3840 | 10.21233/n3822z |
| 516  | 10.21233/n38329 |
| 1732 | 10.21233/n3835f |

|      |                 |
|------|-----------------|
| 2362 | 10.21233/n38376 |
| 351  | 10.21233/n3840w |
| 2594 | 10.21233/n3848x |
| 317  | 10.21233/n3870x |
| 538  | 10.21233/n38719 |
| 1754 | 10.21233/n3874f |
| 261  | 10.21233/n38889 |
| 1695 | 10.21233/n3892c |
| 1897 | 10.21233/n3893r |
| 723  | 10.21233/n3898n |
| 2351 | 10.21233/n38b4g |
| 2962 | 10.21233/n38b67 |
| 226  | 10.21233/n38c8b |
| 1716 | 10.21233/n38f2r |
| 1443 | 10.21233/n38h12 |
| 2265 | 10.21233/n38h3t |
| 880  | 10.21233/n38h93 |
| 1683 | 10.21233/n38j1d |
| 2318 | 10.21233/n38j35 |
| 1013 | 10.21233/n38k71 |
| 1630 | 10.21233/n38k9s |
| 1829 | 10.21233/n38m0q |
| 847  | 10.21233/n38m5m |
| 2287 | 10.21233/n38n02 |
| 791  | 10.21233/n38p72 |
| 2023 | 10.21233/n38q0r |
| 1432 | 10.21233/n38q7d |
| 1651 | 10.21233/n38q8s |
| 1850 | 10.21233/n38q95 |
| 355  | 10.21233/n38s3k |
| 976  | 10.21233/n38s5b |
| 1793 | 10.21233/n38s8g |
| 813  | 10.21233/n38t5p |
| 3048 | 10.21233/n38v2w |
| 1564 | 10.21233/n38w6r |
| 1758 | 10.21233/n38w74 |
| 375  | 10.21233/n38x16 |
| 778  | 10.21233/n38x2k |
| 999  | 10.21233/n38x3z |
| 1817 | 10.21233/n38x63 |
| 2617 | 10.21233/n38x8v |
| 321  | 10.21233/n3902k |
| 1780 | 10.21233/n3917t |

|      |                 |
|------|-----------------|
| 3611 | 10.21233/n39228 |
| 3830 | 10.21233/n3923n |
| 1719 | 10.21233/n3935r |
| 342  | 10.21233/n39398 |
| 530  | 10.21233/n39406 |
| 1156 | 10.21233/n3942z |
| 1553 | 10.21233/n3943b |
| 1976 | 10.21233/n3944q |
| 2586 | 10.21233/n3947v |
| 69   | 10.21233/n3959z |
| 309  | 10.21233/n39699 |
| 2953 | 10.21233/n3977w |
| 252  | 10.21233/n39890 |
| 1888 | 10.21233/n3994f |
| 2290 | 10.21233/n3995t |
| 1520 | 10.21233/n39b21 |
| 2343 | 10.21233/n39b55 |
| 1654 | 10.21233/n39d2q |
| 275  | 10.21233/n39d67 |
| 678  | 10.21233/n39d80 |
| 2920 | 10.21233/n39f6k |
| 816  | 10.21233/n39g8p |
| 1435 | 10.21233/n39h00 |
| 1622 | 10.21233/n39h1c |
| 2047 | 10.21233/n39h34 |
| 2651 | 10.21233/n39h5w |
| 872  | 10.21233/n39h81 |
| 1674 | 10.21233/n39j1q |
| 381  | 10.21233/n39k6z |
| 1002 | 10.21233/n39k8q |
| 1820 | 10.21233/n39m01 |
| 25   | 10.21233/n39m4j |
| 3081 | 10.21233/n39n4w |
| 968  | 10.21233/n39p7c |
| 2015 | 10.21233/n39q1f |
| 205  | 10.21233/n39q4k |
| 1842 | 10.21233/n39q9g |
| 345  | 10.21233/n39s3w |
| 1783 | 10.21233/n39s7d |
| 1980 | 10.21233/n39s8s |
| 804  | 10.21233/n39t37 |
| 1390 | 10.21233/n39t6c |
| 3040 | 10.21233/n39v1t |

|      |                 |
|------|-----------------|
| 312  | 10.21233/n39w3x |
| 2377 | 10.21233/n39w96 |
| 1807 | 10.21233/n39x6d |
| 2609 | 10.21233/n39x9j |
| 497  | 10.21233/n3b02w |
| 1523 | 10.21233/n3b07s |
| 1771 | 10.21233/n3b16r |
| 279  | 10.21233/n3b305 |
| 681  | 10.21233/n3b31j |
| 1711 | 10.21233/n3b34p |
| 1545 | 10.21233/n3b441 |
| 1967 | 10.21233/n3b45d |
| 3781 | 10.21233/n3b517 |
| 1114 | 10.21233/n3b729 |
| 1736 | 10.21233/n3b742 |
| 2945 | 10.21233/n3b78k |
| 1879 | 10.21233/n3b94r |
| 7    | 10.21233/n3bc7k |
| 208  | 10.21233/n3bc8z |
| 1030 | 10.21233/n3bd08 |
| 1646 | 10.21233/n3bd21 |
| 1845 | 10.21233/n3bd3d |
| 2643 | 10.21233/n3bh56 |
| 16   | 10.21233/n3bh6k |
| 232  | 10.21233/n3bh7z |
| 1447 | 10.21233/n3bj0n |
| 1666 | 10.21233/n3bj11 |
| 1866 | 10.21233/n3bj2d |
| 773  | 10.21233/n3bk68 |
| 994  | 10.21233/n3bk7n |
| 1393 | 10.21233/n3bk9d |
| 2612 | 10.21233/n3bm23 |
| 829  | 10.21233/n3bm6m |
| 2270 | 10.21233/n3bn0p |
| 1579 | 10.21233/n3bp82 |
| 2004 | 10.21233/n3bq0c |
| 2632 | 10.21233/n3br0q |
| 3032 | 10.21233/n3br2g |
| 337  | 10.21233/n3bs4k |
| 523  | 10.21233/n3bs5z |
| 1970 | 10.21233/n3bs9g |
| 2369 | 10.21233/n3bt1s |
| 2580 | 10.21233/n3bt25 |

|      |                 |
|------|-----------------|
| 982  | 10.21233/n3bt6p |
| 304  | 10.21233/n3bw2v |
| 1171 | 10.21233/n3bx4z |
| 1568 | 10.21233/n3bx5b |
| 2391 | 10.21233/n3bx8g |
| 489  | 10.21233/n3c026 |
| 1513 | 10.21233/n3c05b |
| 2338 | 10.21233/n3c09v |
| 1138 | 10.21233/n3c149 |
| 1762 | 10.21233/n3c162 |
| 268  | 10.21233/n3c31v |
| 673  | 10.21233/n3c33m |
| 1906 | 10.21233/n3c36r |
| 1724 | 10.21233/n3c45q |
| 1958 | 10.21233/n3c463 |
| 2358 | 10.21233/n3c48v |
| 236  | 10.21233/n3c59k |
| 866  | 10.21233/n3c61w |
| 693  | 10.21233/n3c70v |
| 1104 | 10.21233/n3c717 |
| 19   | 10.21233/n3c887 |
| 1451 | 10.21233/n3c929 |
| 1637 | 10.21233/n3c93p |
| 2671 | 10.21233/n3c976 |
| 1691 | 10.21233/n3cb31 |
| 2902 | 10.21233/n3cb65 |
| 200  | 10.21233/n3cc88 |
| 1836 | 10.21233/n3cd3q |
| 2635 | 10.21233/n3cd6v |
| 1658 | 10.21233/n3cf2p |
| 1892 | 10.21233/n3cf32 |
| 3497 | 10.21233/n3cf8z |
| 799  | 10.21233/n3cg89 |
| 986  | 10.21233/n3cg9p |
| 1603 | 10.21233/n3ch2c |
| 2030 | 10.21233/n3ch3r |
| 1439 | 10.21233/n3cj0z |
| 1857 | 10.21233/n3cj1b |
| 2476 | 10.21233/n3cj33 |
| 2660 | 10.21233/n3cj4g |
| 1571 | 10.21233/n3ck8b |
| 1802 | 10.21233/n3ck9q |
| 820  | 10.21233/n3cm5j |

|      |                 |
|------|-----------------|
| 1626 | 10.21233/n3cm92 |
| 3058 | 10.21233/n3cn34 |
| 329  | 10.21233/n3cp57 |
| 549  | 10.21233/n3cp6m |
| 1766 | 10.21233/n3cq0p |
| 785  | 10.21233/n3cq6z |
| 1592 | 10.21233/n3cq8q |
| 1824 | 10.21233/n3cq93 |
| 2624 | 10.21233/n3cr2s |
| 3839 | 10.21233/n3cr69 |
| 1141 | 10.21233/n3cs6n |
| 1961 | 10.21233/n3cs9s |
| 2361 | 10.21233/n3ct0q |
| 350  | 10.21233/n3ct3v |
| 1789 | 10.21233/n3ct8r |
| 2593 | 10.21233/n3cv1f |
| 701  | 10.21233/n3cw3j |
| 537  | 10.21233/n3cx14 |
| 1984 | 10.21233/n3cx61 |
| 2382 | 10.21233/n3cx7d |
| 316  | 10.21233/n3d12v |
| 2961 | 10.21233/n3d20f |
| 1715 | 10.21233/n3d451 |
| 2317 | 10.21233/n3d752 |
| 1883 | 10.21233/n3db4q |
| 1650 | 10.21233/n3df07 |
| 2286 | 10.21233/n3df20 |
| 3488 | 10.21233/n3df7w |
| 1849 | 10.21233/n3dj08 |
| 2647 | 10.21233/n3dj21 |
| 3047 | 10.21233/n3dj3d |
| 998  | 10.21233/n3dm80 |
| 1815 | 10.21233/n3dn1p |
| 374  | 10.21233/n3dq34 |
| 777  | 10.21233/n3dq5w |
| 2011 | 10.21233/n3dq81 |
| 341  | 10.21233/n3dt35 |
| 1155 | 10.21233/n3dt69 |
| 1778 | 10.21233/n3dt82 |
| 3610 | 10.21233/n3dv4w |
| 527  | 10.21233/n3dx36 |
| 2373 | 10.21233/n3dz0d |
| 308  | 10.21233/n3f11s |

|      |                 |
|------|-----------------|
| 493  | 10.21233/n3f125 |
| 2342 | 10.21233/n3f172 |
| 677  | 10.21233/n3f40f |
| 1707 | 10.21233/n3f45b |
| 2919 | 10.21233/n3f48g |
| 871  | 10.21233/n3f71v |
| 24   | 10.21233/n3f97t |
| 240  | 10.21233/n3f986 |
| 2885 | 10.21233/n3fb75 |
| 204  | 10.21233/n3fd53 |
| 1024 | 10.21233/n3fd87 |
| 1642 | 10.21233/n3ff1x |
| 3080 | 10.21233/n3ff5f |
| 803  | 10.21233/n3fh88 |
| 1607 | 10.21233/n3fj0k |
| 1841 | 10.21233/n3fj1z |
| 3039 | 10.21233/n3fj5g |
| 1806 | 10.21233/n3fn0m |
| 333  | 10.21233/n3ft4v |
| 1770 | 10.21233/n3ft8c |
| 1966 | 10.21233/n3ft9r |
| 2576 | 10.21233/n3fv12 |
| 299  | 10.21233/n3fx24 |
| 519  | 10.21233/n3fx3h |
| 1735 | 10.21233/n3fx71 |
| 2944 | 10.21233/n3g194 |
| 3138 | 10.21233/n3g202 |
| 1698 | 10.21233/n3g45n |
| 15   | 10.21233/n3g974 |
| 828  | 10.21233/n3g99w |
| 2268 | 10.21233/n3gb4b |
| 1633 | 10.21233/n3gf17 |
| 1832 | 10.21233/n3gf2m |
| 1599 | 10.21233/n3gh9z |
| 2026 | 10.21233/n3gj0w |
| 2631 | 10.21233/n3gj2n |
| 3031 | 10.21233/n3gj4d |
| 1796 | 10.21233/n3gn0x |
| 1137 | 10.21233/n3gt6x |
| 3563 | 10.21233/n3gz35 |
| 2324 | 10.21233/n3h182 |
| 3126 | 10.21233/n3h20c |
| 256  | 10.21233/n3h402 |

|      |                 |
|------|-----------------|
| 1891 | 10.21233/n3h45z |
| 2293 | 10.21233/n3h46b |
| 2901 | 10.21233/n3h49g |
| 221  | 10.21233/n3h68s |
| 1255 | 10.21233/n3h72v |
| 1438 | 10.21233/n3h737 |
| 1657 | 10.21233/n3h74m |
| 1856 | 10.21233/n3hb38 |
| 2050 | 10.21233/n3hb4n |
| 2654 | 10.21233/n3hb6d |
| 3056 | 10.21233/n3hb7s |
| 784  | 10.21233/n3hd97 |
| 1006 | 10.21233/n3hf05 |
| 2623 | 10.21233/n3hf52 |
| 971  | 10.21233/n3hh7h |
| 1591 | 10.21233/n3hj06 |
| 1162 | 10.21233/n3hm8x |
| 1559 | 10.21233/n3hm99 |
| 1788 | 10.21233/n3hn07 |
| 315  | 10.21233/n3hq32 |
| 536  | 10.21233/n3hq4f |
| 2381 | 10.21233/n3hr08 |
| 2960 | 10.21233/n3hr3d |
| 501  | 10.21233/n3ht33 |
| 684  | 10.21233/n3hx4h |
| 878  | 10.21233/n3j13g |
| 1680 | 10.21233/n3j157 |
| 33   | 10.21233/n3j39f |
| 1882 | 10.21233/n3j458 |
| 3487 | 10.21233/n3j50q |
| 212  | 10.21233/n3j69g |
| 1033 | 10.21233/n3j71s |
| 811  | 10.21233/n3j99h |
| 1617 | 10.21233/n3jb1t |
| 2646 | 10.21233/n3jb4z |
| 3046 | 10.21233/n3jb6q |
| 3861 | 10.21233/n3jb8g |
| 776  | 10.21233/n3jd85 |
| 997  | 10.21233/n3jd9j |
| 1814 | 10.21233/n3jf27 |
| 2615 | 10.21233/n3jf40 |
| 2007 | 10.21233/n3jj28 |
| 340  | 10.21233/n3jm53 |



|      |                 |
|------|-----------------|
| 1154 | 10.21233/n3jm87 |
| 1551 | 10.21233/n3jm9m |
| 1974 | 10.21233/n3jn0j |
| 307  | 10.21233/n3jq3c |
| 2951 | 10.21233/n3jr2b |
| 492  | 10.21233/n3jt55 |
| 1705 | 10.21233/n3jt89 |
| 2341 | 10.21233/n3jv10 |
| 272  | 10.21233/n3jx1p |
| 2884 | 10.21233/n3k18p |
| 3079 | 10.21233/n3k493 |
| 3473 | 10.21233/n3k501 |
| 2943 | 10.21233/n3kr31 |
| 3067 | 10.21233/n3m49d |
| 3561 | 10.21233/n3mn6f |
| 3771 | 10.21233/n3mn7t |
| 3125 | 10.21233/n3mv20 |
| 3494 | 10.21233/n3mz21 |
| 3054 | 10.21233/n3n48b |
| 2959 | 10.21233/n3nj5b |
| 2892 | 10.21233/n3nv29 |
| 3486 | 10.21233/n3nz2b |
| 2882 | 10.21233/n3pv17 |
| 3078 | 10.21233/n3pv2m |
| 3471 | 10.21233/n3pz18 |
| 2907 | 10.21233/n3qn37 |
| 3029 | 10.21233/n3r20j |
| 3493 | 10.21233/n3rr5b |
| 3454 | 10.21233/n3rv3m |
| 2925 | 10.21233/n3sf5j |
| 2890 | 10.21233/n3sj5k |
| 3485 | 10.21233/n3sn5m |
| 3859 | 10.21233/n3sv49 |
| 2949 | 10.21233/n3t77j |
| 3077 | 10.21233/n3tn4j |
| 3568 | 10.21233/n3v51w |
| 2906 | 10.21233/n3vb7w |
| 3559 | 10.21233/n3w516 |
| 3492 | 10.21233/n3wf8m |
| 3051 | 10.21233/n3wj5h |
| 3583 | 10.21233/n3wz3w |
| 2956 | 10.21233/n3x203 |
| 3484 | 10.21233/n3xf7j |

|       |                    |
|-------|--------------------|
| 3043  | 10.21233/n3xj4f    |
| 3858  | 10.21233/n3xj8z    |
| 2948  | 10.21233/n3z183    |
| 2880  | 10.21233/n3zb6f    |
| 3076  | 10.21233/n3zb7t    |
| 3035  | 10.21233/n3zj54    |
| 40875 | 10.21233/n4bq-p922 |
| 40997 | 10.21233/n4sd-es14 |
| 23006 | 10.21233/n4x8-0k74 |
| 41366 | 10.21233/n4xw-kd72 |
| 21535 | 10.21233/n4y2-m886 |
| 20495 | 10.21233/n5d1-mq43 |
| 26446 | 10.21233/n5nj-5q34 |
| 4087  | 10.21233/n6bg-kc41 |
| 20167 | 10.21233/n7jz-0g74 |
| 24236 | 10.21233/n87r-7a39 |
| 14999 | 10.21233/n8dz-y640 |
| 24590 | 10.21233/n8w1-xz08 |
| 4347  | 10.21233/n8z7-nx69 |
| 4216  | 10.21233/n9a0-fk75 |
| 24467 | 10.21233/n9vy-3c22 |
| 15415 | 10.21233/na70-nc19 |
| 4377  | 10.21233/nbg7-rk14 |
| 26507 | 10.21233/nbnz-tz48 |
| 14637 | 10.21233/nc0w-mk91 |
| 4081  | 10.21233/nc7w-an65 |
| 2069  | 10.21233/nda9-aw65 |
| 4173  | 10.21233/ndhk-ws14 |
| 24325 | 10.21233/nep1-3z35 |
| 24900 | 10.21233/nf08-bn61 |
| 24534 | 10.21233/nfah-4t91 |
| 41146 | 10.21233/ngxf-6p79 |
| 4057  | 10.21233/nkzg-w156 |
| 15115 | 10.21233/nm9j-w372 |
| 24559 | 10.21233/nmwt-fc53 |
| 15366 | 10.21233/nn1h-xp19 |
| 16269 | 10.21233/nn2g-qt23 |
| 4169  | 10.21233/nnyx-kj31 |
| 14494 | 10.21233/npm2-8d68 |
| 17859 | 10.21233/npmk-6h16 |
| 4481  | 10.21233/nq7x-mx79 |
| 22373 | 10.21233/nqb2-na71 |
| 22693 | 10.21233/nrd3-gj67 |

|       |                    |
|-------|--------------------|
| 15772 | 10.21233/nre4-q408 |
| 16086 | 10.21233/nrq0-e757 |
| 41201 | 10.21233/nrvm-5m89 |
| 21838 | 10.21233/nryw-9765 |
| 3890  | 10.21233/nsm3-eh40 |
| 25217 | 10.21233/nssh-az33 |
| 40999 | 10.21233/nt4c-9462 |
| 22982 | 10.21233/nt73-cr73 |
| 4502  | 10.21233/nvn7-f141 |
| 41604 | 10.21233/nwfm-st50 |
| 45629 | 10.21233/nwgq-s472 |
| 45281 | 10.21233/ny4b-e654 |
| 15635 | 10.21233/ny7s-f780 |
| 45383 | 10.21233/p0mn-7534 |
| 41230 | 10.21233/p1h4-4v17 |
| 22786 | 10.21233/p1tb-df93 |
| 4021  | 10.21233/p28f-qv78 |
| 15250 | 10.21233/p37m-jn82 |
| 41252 | 10.21233/p39d-rd93 |
| 25213 | 10.21233/p3md-9032 |
| 14529 | 10.21233/p4mc-9f34 |
| 20180 | 10.21233/p4nw-2d17 |
| 4549  | 10.21233/p4zh-1534 |
| 24281 | 10.21233/p5jz-zk41 |
| 4055  | 10.21233/p76r-3q63 |
| 16081 | 10.21233/p7fp-g179 |
| 22810 | 10.21233/p83k-v204 |
| 45200 | 10.21233/p8ac-sf20 |
| 24218 | 10.21233/p8jv-nx13 |
| 17340 | 10.21233/p96n-6v19 |
| 24846 | 10.21233/p9bs-0686 |
| 15649 | 10.21233/paxn-mh26 |
| 15746 | 10.21233/pbbn-5h88 |
| 24929 | 10.21233/pbc8-c366 |
| 25287 | 10.21233/pbmw-9s02 |
| 24626 | 10.21233/pbq8-yy15 |
| 16251 | 10.21233/pbwt-b156 |
| 15296 | 10.21233/pck3-ct03 |
| 16271 | 10.21233/pcmd-m560 |
| 25283 | 10.21233/pe6c-pb93 |
| 24277 | 10.21233/pegh-gp75 |
| 16063 | 10.21233/pfsb-bc85 |
| 24671 | 10.21233/pgj9-5v59 |

|       |                    |
|-------|--------------------|
| 32258 | 10.21233/pgwj-9f54 |
| 24348 | 10.21233/ph7f-8b78 |
| 25078 | 10.21233/ph7n-8m49 |
| 16217 | 10.21233/phdj-h055 |
| 4103  | 10.21233/phdz-hs08 |
| 44941 | 10.21233/phqc-me73 |
| 25344 | 10.21233/pht8-mj95 |
| 4504  | 10.21233/pj9k-qg05 |
| 45097 | 10.21233/pkhx-pf62 |
| 16179 | 10.21233/pkt4-am12 |
| 15371 | 10.21233/pn5c-9x40 |
| 18123 | 10.21233/pnbx-1e72 |
| 14928 | 10.21233/pps9-sn76 |
| 45636 | 10.21233/pr2m-cc37 |
| 14556 | 10.21233/ps1x-es22 |
| 15811 | 10.21233/psnq-xv46 |
| 14446 | 10.21233/ptaw-4d96 |
| 14768 | 10.21233/ptjw-d867 |
| 40439 | 10.21233/ptq6-q055 |
| 14930 | 10.21233/ptx4-dz18 |
| 4286  | 10.21233/pvn2-a273 |
| 25386 | 10.21233/pvpd-tm53 |
| 45219 | 10.21233/pwgs-4g85 |
| 22851 | 10.21233/pxem-ce07 |
| 15342 | 10.21233/pyjt-xa38 |
| 41280 | 10.21233/pys7-k313 |
| 4047  | 10.21233/q057-d355 |
| 19993 | 10.21233/q20r-m406 |
| 22847 | 10.21233/q2tc-z758 |
| 4523  | 10.21233/q36c-4q49 |
| 21545 | 10.21233/q6p2-kw54 |
| 17292 | 10.21233/q744-pp22 |
| 42570 | 10.21233/q95g-2x92 |
| 41421 | 10.21233/q9sk-t894 |
| 45192 | 10.21233/q9wh-hq41 |
| 14104 | 10.21233/qaht-6745 |
| 14935 | 10.21233/qamn-c462 |
| 25400 | 10.21233/qbf7-hn56 |
| 21770 | 10.21233/qbkz-hz40 |
| 32260 | 10.21233/qd2q-5c39 |
| 24553 | 10.21233/qdx7-af11 |
| 4135  | 10.21233/qem1-6q63 |
| 13029 | 10.21233/qf6p-8j75 |

|       |                    |
|-------|--------------------|
| 4209  | 10.21233/qf8f-me80 |
| 22648 | 10.21233/qf8f-wb97 |
| 4470  | 10.21233/qfrx-zf42 |
| 42547 | 10.21233/qg8e-np07 |
| 45173 | 10.21233/qgv1-sv24 |
| 45164 | 10.21233/qh50-8208 |
| 15377 | 10.21233/qhtr-fk23 |
| 41183 | 10.21233/qjda-f561 |
| 4085  | 10.21233/qjjs-h634 |
| 4116  | 10.21233/qjxn-st60 |
| 44723 | 10.21233/qk2b-8b38 |
| 22904 | 10.21233/qka4-j483 |
| 46479 | 10.21233/qkmf-dk52 |
| 41417 | 10.21233/qmke-wg69 |
| 14558 | 10.21233/qmy5-xr61 |
| 4483  | 10.21233/qp8c-4854 |
| 22344 | 10.21233/qphx-cn83 |
| 4197  | 10.21233/qq1x-zk02 |
| 41476 | 10.21233/qqk2-fy61 |
| 15612 | 10.21233/qrjk-gj85 |
| 24100 | 10.21233/qrwc-m362 |
| 22814 | 10.21233/qtf9-zf76 |
| 24300 | 10.21233/qtfz-0018 |
| 41237 | 10.21233/qx7x-1245 |
| 24250 | 10.21233/qx94-hx64 |
| 4330  | 10.21233/qxv2-w585 |
| 40949 | 10.21233/qyrx-tz10 |
| 42685 | 10.21233/qzek-wp34 |
| 24956 | 10.21233/r08t-2829 |
| 15294 | 10.21233/r0cq-9083 |
| 20397 | 10.21233/r0kz-yt78 |
| 20311 | 10.21233/r0mg-q111 |
| 41339 | 10.21233/r11j-mj44 |
| 4058  | 10.21233/r27w-7c93 |
| 4532  | 10.21233/r2nw-6c72 |
| 23019 | 10.21233/r37v-gx98 |
| 24193 | 10.21233/r3mj-5588 |
| 15704 | 10.21233/r4mc-tc72 |
| 25127 | 10.21233/r4xz-v815 |
| 16238 | 10.21233/r5wm-z686 |
| 26516 | 10.21233/r6kr-hg54 |
| 4351  | 10.21233/r749-6141 |
| 25318 | 10.21233/r7dr-q154 |

|       |                     |
|-------|---------------------|
| 22842 | 10.21233/r8zp-ww92  |
| 4102  | 10.21233/r9pn-tx36  |
| 17338 | 10.21233/r9wb-gz24  |
| 22646 | 10.21233/rahy-8590  |
| 4203  | 10.21233/raph-rb39  |
| 41753 | 10.21233/rarx-fe28  |
| 26425 | 10.21233/rb09-6144  |
| 15325 | 10.21233/rb6f-1g25  |
| 15368 | 10.21233/rc8q-je06  |
| 4154  | 10.21233/rce2-en21  |
| 41746 | 10.21233/rd01-0v56  |
| 22757 | 10.21233/rd1y-0x62  |
| 45716 | 10.21233/rfek-5a50  |
| 14650 | 10.21233/rg17-hr80  |
| 42663 | 10.21233/rgr7-f616  |
| 15020 | 10.21233/rgvz-gj38  |
| 42677 | 10.21233/rhm6-pc30  |
| 15009 | 10.21233/rhs1-wt07  |
| 45324 | 10.21233/rj4f-fn81  |
| 13060 | 10.21233/rja4-q512  |
| 4420  | 10.21233/rmkd-2162  |
| 41411 | 10.21233/rmpn-9878  |
| 24931 | 10.21233/rn1j-tb02  |
| 25404 | 10.21233/rn65-2k02  |
| 4490  | 10.21233/rnkp-2723  |
| 15680 | 10.21233/rp2w-0753  |
| 15785 | 10.21233/rp8s-2k53  |
| 41750 | 10.21233/rpzt-3p58  |
| 15909 | 10.21233/rqzm-ma95  |
| 24574 | 10.21233/rrows-7771 |
| 41521 | 10.21233/rrzj-sp79  |
| 24944 | 10.21233/rsdg-ep81  |
| 20042 | 10.21233/rt31-zw12  |
| 45207 | 10.21233/rt3s-g752  |
| 45327 | 10.21233/rtcq-kn47  |
| 22761 | 10.21233/rw25-2v24  |
| 25372 | 10.21233/rwdw-1852  |
| 21418 | 10.21233/rwpj-e158  |
| 24952 | 10.21233/ryar-ev70  |
| 22689 | 10.21233/rybb-mp20  |
| 4134  | 10.21233/ryfa-y280  |
| 45725 | 10.21233/s0pq-6335  |
| 4545  | 10.21233/s1ae-ar89  |

|       |                    |
|-------|--------------------|
| 40627 | 10.21233/s1va-qn28 |
| 3913  | 10.21233/s1x4-mq32 |
| 46485 | 10.21233/s2j6-5w36 |
| 17597 | 10.21233/s3er-nf45 |
| 15284 | 10.21233/s3ma-a925 |
| 18106 | 10.21233/s4jg-yh87 |
| 22119 | 10.21233/s4k3-4429 |
| 14370 | 10.21233/s4yh-p034 |
| 22738 | 10.21233/s54m-1k85 |
| 16073 | 10.21233/s6jx-f115 |
| 42673 | 10.21233/s6my-6052 |
| 45387 | 10.21233/s6wg-4d92 |
| 4288  | 10.21233/s7rb-ap65 |
| 41220 | 10.21233/s7t1-hx33 |
| 24520 | 10.21233/s85f-3f36 |
| 24837 | 10.21233/s8ht-3z18 |
| 4517  | 10.21233/s8kk-y022 |
| 17383 | 10.21233/s9wz-1g21 |
| 25013 | 10.21233/sa5v-5h89 |
| 24102 | 10.21233/sa88-mb64 |
| 14972 | 10.21233/sam2-cd21 |
| 45314 | 10.21233/sb36-c222 |
| 24284 | 10.21233/sbes-jp06 |
| 46462 | 10.21233/sc2f-5d04 |
| 24197 | 10.21233/sc9n-2r53 |
| 24578 | 10.21233/scew-1h82 |
| 45168 | 10.21233/scrs-nq43 |
| 4118  | 10.21233/sczz-2g33 |
| 22763 | 10.21233/sd3z-7v27 |
| 4554  | 10.21233/sdqe-ky81 |
| 3884  | 10.21233/sewp-vp39 |
| 25027 | 10.21233/sf2s-x915 |
| 4543  | 10.21233/sfsk-ej53 |
| 21422 | 10.21233/sg70-ew74 |
| 4150  | 10.21233/shhz-0f61 |
| 4005  | 10.21233/sj04-8c24 |
| 22793 | 10.21233/sjqw-qa18 |
| 15511 | 10.21233/sk02-jh34 |
| 17672 | 10.21233/skp4-td45 |
| 15713 | 10.21233/sn81-zc38 |
| 22753 | 10.21233/snt9-p808 |
| 20293 | 10.21233/snyf-b526 |
| 4030  | 10.21233/sq17-8k63 |

|       |                    |
|-------|--------------------|
| 24110 | 10.21233/sq7c-9a90 |
| 25232 | 10.21233/sqtj-fr11 |
| 15381 | 10.21233/ss13-7n86 |
| 17880 | 10.21233/ssg9-gk36 |
| 40955 | 10.21233/stpw-ta17 |
| 24497 | 10.21233/sxfw-2b43 |
| 24181 | 10.21233/sxhe-sa20 |
| 24227 | 10.21233/sxhx-j135 |
| 22824 | 10.21233/sy1b-py46 |
| 41245 | 10.21233/syjt-3739 |
| 4002  | 10.21233/szbb-8k05 |
| 18159 | 10.21233/t00e-b616 |
| 22342 | 10.21233/t052-s807 |
| 22674 | 10.21233/t0ea-cd42 |
| 4383  | 10.21233/t0t5-0w85 |
| 24108 | 10.21233/t1ba-1q15 |
| 4032  | 10.21233/t1n7-cq82 |
| 45406 | 10.21233/t1p9-n569 |
| 41030 | 10.21233/t2fv-s268 |
| 41453 | 10.21233/t318-2y34 |
| 42712 | 10.21233/t318-n046 |
| 20223 | 10.21233/t3c4-7x23 |
| 45221 | 10.21233/t3tp-6180 |
| 16129 | 10.21233/t4b6-ax18 |
| 24669 | 10.21233/t4ct-mw46 |
| 24493 | 10.21233/t4n0-6s83 |
| 41210 | 10.21233/t55e-8g66 |
| 3973  | 10.21233/t57v-4b19 |
| 45144 | 10.21233/t6dq-4b03 |
| 24753 | 10.21233/t7ne-1h11 |
| 4117  | 10.21233/tab2-ts04 |
| 15462 | 10.21233/tadv-5c57 |
| 24145 | 10.21233/tbav-4v25 |
| 21415 | 10.21233/tbhk-kw62 |
| 3866  | 10.21233/tcav-fn36 |
| 20046 | 10.21233/td9p-m745 |
| 14676 | 10.21233/te1p-he56 |
| 24859 | 10.21233/te66-cy52 |
| 20512 | 10.21233/tegf-sg62 |
| 42745 | 10.21233/tekc-rz82 |
| 17398 | 10.21233/teyv-5z70 |
| 14510 | 10.21233/tfq7-s408 |
| 22955 | 10.21233/tgd4-nk81 |

|       |                    |
|-------|--------------------|
| 3872  | 10.21233/tk7w-th94 |
| 26435 | 10.21233/tktg-sh56 |
| 4518  | 10.21233/tkzz-2t77 |
| 14641 | 10.21233/tmdc-mj73 |
| 1147  | 10.21233/tp4a-h605 |
| 4529  | 10.21233/tphv-z798 |
| 45722 | 10.21233/tpvk-wa79 |
| 24112 | 10.21233/tq8x-5z45 |
| 17328 | 10.21233/tr2m-fm40 |
| 25410 | 10.21233/ts6e-h593 |
| 22938 | 10.21233/tt6f-9c78 |
| 15825 | 10.21233/ttaf-pc16 |
| 22771 | 10.21233/ttjd-w232 |
| 15665 | 10.21233/twkp-hz46 |
| 45204 | 10.21233/tx0m-hk41 |
| 15323 | 10.21233/txns-sv58 |
| 19931 | 10.21233/txpr-cb18 |
| 25131 | 10.21233/tz5g-8d59 |
| 4294  | 10.21233/v088-1d37 |
| 17359 | 10.21233/v0wk-b742 |
| 24048 | 10.21233/v1dw-9x16 |
| 15363 | 10.21233/v2kw-6697 |
| 24061 | 10.21233/v3yx-9c11 |
| 22640 | 10.21233/v4mx-q473 |
| 22662 | 10.21233/v7ky-p784 |
| 17711 | 10.21233/v7nq-4w81 |
| 24343 | 10.21233/v8jm-v785 |
| 1582  | 10.21233/v98s-4073 |
| 4405  | 10.21233/v9em-3b09 |
| 25406 | 10.21233/vbwz-tg22 |
| 41401 | 10.21233/vc1n-v894 |
| 14955 | 10.21233/vcma-8k37 |
| 4533  | 10.21233/vdpe-dp57 |
| 15403 | 10.21233/vds5-pf58 |
| 14803 | 10.21233/ve01-y167 |
| 40990 | 10.21233/ve15-mn82 |
| 24279 | 10.21233/veqa-0n52 |
| 14619 | 10.21233/vf6b-8k35 |
| 16016 | 10.21233/vffp-x175 |
| 41460 | 10.21233/vg3e-tx36 |
| 41485 | 10.21233/vgxh-qv84 |
| 4207  | 10.21233/vh8n-2090 |
| 22664 | 10.21233/vhkm-se51 |

|       |                    |
|-------|--------------------|
| 4468  | 10.21233/vhxz-9969 |
| 24032 | 10.21233/vj9n-bt57 |
| 22960 | 10.21233/vjdb-ec95 |
| 22845 | 10.21233/vkd7-vh44 |
| 22652 | 10.21233/vmeh-gz58 |
| 15766 | 10.21233/vmwe-g130 |
| 15276 | 10.21233/vmxy-3004 |
| 22745 | 10.21233/vn5f-tz80 |
| 4200  | 10.21233/vpnw-pv89 |
| 24410 | 10.21233/vq9d-x874 |
| 45410 | 10.21233/vqfq-2n70 |
| 16054 | 10.21233/vqnc-sx41 |
| 4020  | 10.21233/vqqw-nc29 |
| 15633 | 10.21233/vr5d-4130 |
| 1782  | 10.21233/vrv9-4t45 |
| 45115 | 10.21233/vs9g-8428 |
| 41770 | 10.21233/vsfm-xz32 |
| 24902 | 10.21233/vtmh-9d28 |
| 15882 | 10.21233/vx1h-dj04 |
| 4056  | 10.21233/vxzv-9k94 |
| 4452  | 10.21233/vy6k-x487 |
| 15022 | 10.21233/w03f-sr85 |
| 14498 | 10.21233/w0ab-4w11 |
| 42671 | 10.21233/w0c2-k512 |
| 45719 | 10.21233/w0j3-9h31 |
| 17296 | 10.21233/w2gd-mz79 |
| 43295 | 10.21233/w4n6-qv07 |
| 3999  | 10.21233/w4z8-3q21 |
| 14564 | 10.21233/w4zt-yj57 |
| 25308 | 10.21233/w5qv-sv92 |
| 15214 | 10.21233/w5rw-qd24 |
| 25157 | 10.21233/w61s-9827 |
| 4069  | 10.21233/w63t-nf61 |
| 3896  | 10.21233/w6j3-gn15 |
| 17324 | 10.21233/w72d-bx06 |
| 41469 | 10.21233/w7bt-xr68 |
| 45194 | 10.21233/w88p-xj69 |
| 41532 | 10.21233/w9z1-fn16 |
| 19933 | 10.21233/watr-af89 |
| 24637 | 10.21233/wb8q-wk43 |
| 4476  | 10.21233/wbfp-6424 |
| 22638 | 10.21233/wc9m-v912 |
| 41233 | 10.21233/wefk-sp33 |

|       |                    |
|-------|--------------------|
| 4097  | 10.21233/weqb-ef25 |
| 4380  | 10.21233/whjz-0k24 |
| 45710 | 10.21233/wjmk-7376 |
| 4510  | 10.21233/wkz1-sd64 |
| 41323 | 10.21233/wm29-be77 |
| 15103 | 10.21233/wn4z-7521 |
| 26510 | 10.21233/wnfe-f385 |
| 41587 | 10.21233/wp2z-kt38 |
| 17320 | 10.21233/wq2v-5053 |
| 3882  | 10.21233/wq2x-c027 |
| 26520 | 10.21233/wqej-0r45 |
| 14897 | 10.21233/wrb3-qd23 |
| 14959 | 10.21233/wrt5-qc27 |
| 45389 | 10.21233/ws4c-an72 |
| 22962 | 10.21233/wvsb-6130 |
| 21796 | 10.21233/wwa4-0236 |
| 13073 | 10.21233/wwc5-6x04 |
| 4466  | 10.21233/wwj8-s239 |
| 25382 | 10.21233/wxyd-q154 |
| 16181 | 10.21233/wy62-rm78 |
| 15385 | 10.21233/wy8b-3e83 |
| 3934  | 10.21233/wyaq-1b97 |
| 25003 | 10.21233/x0ba-j040 |
| 15594 | 10.21233/x0c3-ed21 |
| 41228 | 10.21233/x0cd-0q06 |
| 17404 | 10.21233/x0jy-tp30 |
| 24259 | 10.21233/x0z2-py02 |
| 4304  | 10.21233/x11h-5275 |
| 4059  | 10.21233/x17y-bb18 |
| 21706 | 10.21233/x19k-0e45 |
| 15878 | 10.21233/x1bk-ra92 |
| 3894  | 10.21233/x1s2-s723 |
| 15138 | 10.21233/x1ts-qh05 |
| 18110 | 10.21233/x2md-aj39 |
| 4024  | 10.21233/x2v2-4v32 |
| 14110 | 10.21233/x34r-6x54 |
| 14633 | 10.21233/x35d-q248 |
| 4041  | 10.21233/x43j-z193 |
| 4083  | 10.21233/x49t-wj37 |
| 42655 | 10.21233/x4x4-tg29 |
| 3986  | 10.21233/x4xa-1k90 |
| 24593 | 10.21233/x6et-gw35 |
| 26442 | 10.21233/x6sj-rv93 |

|       |                    |
|-------|--------------------|
| 24463 | 10.21233/x7a5-2c36 |
| 45816 | 10.21233/x7et-qe66 |
| 15719 | 10.21233/x7hq-ts05 |
| 41758 | 10.21233/x8p5-xp81 |
| 19820 | 10.21233/x8y7-re14 |
| 24927 | 10.21233/x90a-8v66 |
| 41171 | 10.21233/x91r-1a30 |
| 4145  | 10.21233/x9b0-z153 |
| 24616 | 10.21233/x9jq-my02 |
| 4332  | 10.21233/xa3s-kj49 |
| 40914 | 10.21233/xa6z-jh17 |
| 24639 | 10.21233/xadk-1x55 |
| 24941 | 10.21233/xb5c-wb44 |
| 14512 | 10.21233/xc0y-6b19 |
| 4314  | 10.21233/xe1b-tf19 |
| 32262 | 10.21233/xe3h-wb42 |
| 22953 | 10.21233/xeev-fr63 |
| 41203 | 10.21233/xeke-2h87 |
| 41506 | 10.21233/xett-n046 |
| 41911 | 10.21233/xfh1-6085 |
| 41582 | 10.21233/xfrs-q084 |
| 4391  | 10.21233/xj85-7c26 |
| 22801 | 10.21233/xm08-vp32 |
| 26439 | 10.21233/xmbg-mz72 |
| 41269 | 10.21233/xn7x-eb17 |
| 3870  | 10.21233/xnjz-z143 |
| 21702 | 10.21233/xp8e-bd49 |
| 40844 | 10.21233/xpy2-m222 |
| 4042  | 10.21233/xq55-z804 |
| 15904 | 10.21233/xqhj-c782 |
| 22791 | 10.21233/xraa-re03 |
| 17417 | 10.21233/xrzb-zq82 |
| 22691 | 10.21233/xsdn-cx54 |
| 41479 | 10.21233/xsk9-bx90 |
| 24964 | 10.21233/xss2-e959 |
| 15406 | 10.21233/xstm-aq61 |
| 24572 | 10.21233/xsrx-ky48 |
| 4004  | 10.21233/xw05-mj88 |
| 25402 | 10.21233/xw8c-gq46 |
| 3937  | 10.21233/xwhx-v671 |
| 3874  | 10.21233/xwk9-q426 |
| 15244 | 10.21233/xyf7-9v15 |
| 14491 | 10.21233/xyvh-px20 |

|       |                    |
|-------|--------------------|
| 22736 | 10.21233/xyxq-gr38 |
| 15950 | 10.21233/xz5z-pr53 |
| 3928  | 10.21233/y0cr-gc25 |
| 20308 | 10.21233/y0pj-8d71 |
| 22352 | 10.21233/y1ej-xh18 |
| 24563 | 10.21233/y1f4-bz49 |
| 14125 | 10.21233/y28m-nq05 |
| 18051 | 10.21233/y3mq-m120 |
| 24106 | 10.21233/y42f-6218 |
| 3878  | 10.21233/y4e7-me97 |
| 16186 | 10.21233/y4mj-v434 |
| 44951 | 10.21233/y4ss-7811 |
| 41276 | 10.21233/y554-yd92 |
| 25835 | 10.21233/y5bx-3n98 |
| 22238 | 10.21233/y6je-9a17 |
| 4189  | 10.21233/y7b7-5a72 |
| 24759 | 10.21233/ya3m-xh05 |
| 24057 | 10.21233/ya53-0561 |
| 22346 | 10.21233/yb97-px46 |
| 24238 | 10.21233/ycfn-p887 |
| 14289 | 10.21233/yczc-8b58 |
| 4541  | 10.21233/yd8b-wb47 |
| 14925 | 10.21233/ydnc-0495 |
| 4249  | 10.21233/ye9x-z889 |
| 4539  | 10.21233/yeg0-6p54 |
| 24852 | 10.21233/yfcd-n026 |
| 25083 | 10.21233/yfwj-f753 |
| 40569 | 10.21233/ygbz-tf05 |
| 15939 | 10.21233/yhre-qg42 |
| 4187  | 10.21233/yj5d-ej18 |
| 24954 | 10.21233/yjbz-h684 |
| 15209 | 10.21233/yjhg-b425 |
| 41397 | 10.21233/yktz-5q37 |
| 14944 | 10.21233/ym56-bk43 |
| 21915 | 10.21233/ymye-gn96 |
| 41218 | 10.21233/yp3p-5z78 |
| 22931 | 10.21233/yp88-eq30 |
| 24166 | 10.21233/yr7f-7517 |
| 41562 | 10.21233/ysrz-ve64 |
| 15223 | 10.21233/yt10-kv93 |
| 24491 | 10.21233/ytdh-rq41 |
| 24358 | 10.21233/yvzf-7m50 |
| 15205 | 10.21233/yw2g-1t26 |

|       |                    |
|-------|--------------------|
| 16175 | 10.21233/ywa8-4h38 |
| 15976 | 10.21233/ywkn-vk84 |
| 41580 | 10.21233/ywn4-f081 |
| 21772 | 10.21233/yxa5-7p09 |
| 14291 | 10.21233/yxsc-gf06 |
| 41121 | 10.21233/yxxp-as21 |
| 45707 | 10.21233/yxzd-xn66 |
| 22812 | 10.21233/yy4y-0p72 |
| 4340  | 10.21233/yys3-qz47 |
| 14792 | 10.21233/yzwy-0p89 |
| 17945 | 10.21233/yzzz-aa38 |
| 17377 | 10.21233/z08c-rb24 |
| 21766 | 10.21233/z256-fh92 |
| 15197 | 10.21233/z377-nz81 |
| 24611 | 10.21233/z3vf-sk02 |
| 17385 | 10.21233/z5j4-8v57 |
| 17366 | 10.21233/z627-yk93 |
| 41159 | 10.21233/z7gy-mw75 |
| 15247 | 10.21233/z7yn-c813 |
| 4323  | 10.21233/z80c-sf19 |
| 17347 | 10.21233/z81b-ch22 |
| 25289 | 10.21233/z8a8-vz94 |
| 4272  | 10.21233/z913-g676 |
| 3887  | 10.21233/z9wq-cc18 |
| 24030 | 10.21233/za1e-fb06 |
| 15730 | 10.21233/zakg-m595 |
| 20287 | 10.21233/zc0w-ge65 |
| 14539 | 10.21233/zcrn-2h47 |
| 4497  | 10.21233/zcst-x145 |
| 15660 | 10.21233/zd0z-ve57 |
| 24854 | 10.21233/zd47-af67 |
| 14941 | 10.21233/zdh7-r634 |
| 45398 | 10.21233/zdqt-kr34 |
| 41926 | 10.21233/zdyp-3t68 |
| 15796 | 10.21233/ze2y-2e90 |
| 15715 | 10.21233/zedd-cm35 |
| 2028  | 10.21233/zesr-6507 |
| 4309  | 10.21233/zf76-3490 |
| 16079 | 10.21233/zh76-mx93 |
| 14799 | 10.21233/zhp9-cm48 |
| 4359  | 10.21233/zhsh-zr85 |
| 14629 | 10.21233/zjqh-j697 |
| 22831 | 10.21233/zjr5-v667 |

|       |                    |
|-------|--------------------|
| 4374  | 10.21233/zjtz-k726 |
| 20165 | 10.21233/zk15-wq18 |
| 40791 | 10.21233/zkeb-rj50 |
| 15933 | 10.21233/zkg7-4840 |
| 4505  | 10.21233/zkna-r256 |
| 15902 | 10.21233/zn7m-gc31 |
| 12    | 10.21233/znex-sp94 |
| 15682 | 10.21233/zpe5-s053 |
| 40168 | 10.21233/zq7z-7471 |
| 24078 | 10.21233/zqez-kr13 |
| 41335 | 10.21233/zqj0-ma56 |
| 24149 | 10.21233/zqk8-aa65 |
| 4372  | 10.21233/zqse-ep64 |
| 4507  | 10.21233/zr55-9j43 |
| 42714 | 10.21233/zspv-ta39 |
| 24243 | 10.21233/zvcd-yn53 |
| 13053 | 10.21233/zvn7-m788 |
| 24302 | 10.21233/zw4f-ce58 |
| 13071 | 10.21233/zw81-nc35 |
| 20372 | 10.21233/zwdj-4e50 |
| 4404  | 10.21233/zwpy-vk55 |
| 4498  | 10.21233/zx8x-vj28 |
| 4050  | 10.21233/zxz5-q261 |
